# Supplementary material for: The Feasibility of Implementing the Flexible Surge Capacity Concept in Bangkok: Willing Participants and Educational Gaps
Source: Int J Environ Res Public Health. 2021 Jul 22;18(15):7793. doi: 10.3390/ijerph18157793 (PMC8345441; doi:10.3390/ijerph18157793)
Supplement: Supplementary file 1 [file ijerph-18-07793-s001.zip › ijerph-1200729-Supplementary B.xlsx]

## Sheet: Export Summary
	This document was exported from Numbers. Each table was converted to an Excel worksheet. All other objects on each Numbers sheet were placed on separate worksheets. Please be aware that formula calculations may differ in Excel.
	Numbers Sheet Name	Numbers Table Name	Excel Worksheet Name
	PHCC
		Table 1	PHCC
	Private clinics
		Table 1	Private clinics
	Dental
		Table 1-1	Dental - Table 1-1
	school
		Table 1	school
	Sport
		Table 1	Sport
	Veterinary
		Table 1	Veterinary
	Hotel
		Table 1	Hotel

## Sheet: PHCC
Primary Health Care Centers
Timestamp	ชื่อหน่วยพยาบาลของท่าน	1.หากเวลาที่เกิดเหตุหน่วยงานของท่านมีผู้ขึ้นปฏิบัติงานปกติ ท่านจะให้ความช่วยเหลืออะไรบ้าง	2.1. ในด้านอุปกรณ์และเครื่องมือ	2.2.ในด้านทรัพยากรในองค์กร	2.3.ในด้านเจ้าหน้าที่ ความรู้หรือทรัพยากรใดที่เจ้าหน้าที่ของท่านต้องการเพื่อเพิ่มความสามารถในการให้การดูแลผู้บาดเจ็บ	2.4.ในด้านทรัพยากรด้านความรู้ความสามารถ ท่านมีทักษะเพียงพอสำหรับการช่วยเหลือที่ท่านอยากให้ในอุบัติเหตุใหญ่เมื่อความต้องการการช่วยเหลือมากกว่าทรัพยากรที่มีหรือไม่	กรุณาให้ความเห็นเพิ่มเติม
11/10/2020 14:03:42	ศบส 6 สโมสรวัฒนธรรมหญิง	ท่านสามารถรับดูแลผู้บาดเจ็บเล็กน้อยได้, ท่านสามารถรับดูแลผู้ป่วยฉุกเฉินที่ไม่เกี่ยวข้องกับอุบัติเหตุเพื่อบรรเทาความหนาแน่นของห้องฉุกเฉินที่โรงพยาบาล, หน่วยงานของท่านสามารถให้การดูแลทางจิตใจกับผู้บาดเจ็บและทีมงานได้	ท่านขาดอุปกรณ์และเครื่องมือเพื่อเพิ่มความสามารถในการช่วยเหลือ กรุณาระบุอุปกรณ์และเครื่องมือที่ต้องการในอื่นๆ, Defibrillator มีเฉพาะ AED	ท่านขาดทรัพยากรในองค์กรเพื่อเพิ่มความสามารถในการช่วยเหลือ กรุณาระบุทรัพยากรในองค์กรที่ต้องการในอื่นๆ	ACLS	ไม่มี แต่ท่านสามารถทำได้หากมีคนมาแนะนำการฝึกปฏิบัติ กรุณาระบุสิ่งที่ท่านสามารถฝึกได้ในอื่นๆ	ขอบคุณสำหรับคำถามที่ช่วยให้หน่วยงานได้ประเมินตรเอง
12/24/2020 15:07:12	ศบส.47คลองขวาง	ท่านสามารถรับดูแลผู้บาดเจ็บเล็กน้อยได้, หน่วยงานของท่านสามารถให้การดูแลทางจิตใจกับผู้บาดเจ็บและทีมงานได้	ท่านขาดอุปกรณ์และเครื่องมือเพื่อเพิ่มความสามารถในการช่วยเหลือ กรุณาระบุอุปกรณ์และเครื่องมือที่ต้องการในอื่นๆ	ท่านขาดทรัพยากรในองค์กรเพื่อเพิ่มความสามารถในการช่วยเหลือ กรุณาระบุทรัพยากรในองค์กรที่ต้องการในอื่นๆ, บุคลากร สถานที่	สถานที่จำกัด ไม่เหมาะสม	ไม่มี แต่ท่านสามารถทำได้หากมีคนมาแนะนำการฝึกปฏิบัติ กรุณาระบุสิ่งที่ท่านสามารถฝึกได้ในอื่นๆ, การดูแลจิตใจของครอบครัว	ศบส.47 ขณะนี้อยู่ในที่ทำการชั่วคราว ซึ่งคับแคบมาก จึงมีปัญหาในการดูแลผู้ป่วยในสถานการณ์อุบัติเหตุฉุกเฉินใหญ่ๆ
11/10/2020 16:49:37	ศบส.54ทัศน์เอี่ยม	ท่านสามารถรับดูแลผู้บาดเจ็บรุนแรงด้วยการให้การดูแลเบื้องต้นให้ผู้บาดเจ็บมีอาการคงที่ ระหว่างรอการส่งต่อไปยังโรงพยาบาลขนาดใหญ่, หน่วยงานของท่านสามารถให้การดูแลทางจิตใจกับผู้บาดเจ็บและทีมงานได้	ท่านขาดอุปกรณ์และเครื่องมือเพื่อเพิ่มความสามารถในการช่วยเหลือ กรุณาระบุอุปกรณ์และเครื่องมือที่ต้องการในอื่นๆ, วัสดุ อุปกรณ์ทางการแพทย์	ท่านขาดทรัพยากรในองค์กรเพื่อเพิ่มความสามารถในการช่วยเหลือ กรุณาระบุทรัพยากรในองค์กรที่ต้องการในอื่นๆ, พยาบาลที่มีความชำนาญด้านการช่วยเหลือฉุกเฉิน	ความรู้ทักษะ ประสบการณ์ และการบริหารจัดการในการให้การดูแลเบื่องต้น	ใช่ แต่ท่านต้องการการฝึกปฏิบัติเพิ่มเติม	บุคลากรไม่เพียงพอ ขาดทักษะและประสบการณ์ ขาดวัสดุอุปกรณ์สำหรับอุบัติเหตุใหญ่
12/29/2020 10:23:41	ศบส36บุคคโล	ท่านสามารถรับดูแลผู้บาดเจ็บเล็กน้อยได้	มีเครื่องมือช่วยชีวิตพื้นฐาน	มีทรัพยากรพื้นฐานสำหรีบหน่วยบริการปฐมภูมิ	บุคลากร ความรู้ แบะทรัพยาการเพียงพอสำหรับการดูแลพื้นฐาน	เมื่อเกิดอุบัติเหตุใหญ่จะประสานส่งต่อ	หน่วยบริการปฐมภูมิจะดูแลจั้นพื้นฐานและส่งต่อเมื่อเกินรวามสามารถ
12/28/2020 9:36:37	ศูนย์บริการสาธารณสุข	ท่านสามารถรับดูแลผู้บาดเจ็บรุนแรงด้วยการให้การดูแลเบื้องต้นให้ผู้บาดเจ็บมีอาการคงที่ ระหว่างรอการส่งต่อไปยังโรงพยาบาลขนาดใหญ่	ท่านขาดอุปกรณ์และเครื่องมือเพื่อเพิ่มความสามารถในการช่วยเหลือ กรุณาระบุอุปกรณ์และเครื่องมือที่ต้องการในอื่นๆ, Medicut iv fluid จำนวนไม่เพียงพอ	ท่านขาดทรัพยากรในองค์กรเพื่อเพิ่มความสามารถในการช่วยเหลือ กรุณาระบุทรัพยากรในองค์กรที่ต้องการในอื่นๆ	ประเทินผู้ป่วยและความชำนาญ	ใช่ แต่ท่านต้องการการฝึกปฏิบัติเพิ่มเติม	ไม่มี
12/24/2020 17:04:26	ศูนย์บริการสาธารณสุข 1 สะพานมอญ	ท่านสามารถรับดูแลผู้บาดเจ็บเล็กน้อยได้, หน่วยงานของท่านสามารถให้การดูแลทางจิตใจกับผู้บาดเจ็บและทีมงานได้, หน่วยงานของท่านสามารถประสานงานการขนย้ายผู้บาดเจ็บกลับบ้านได้	ท่านขาดอุปกรณ์และเครื่องมือเพื่อเพิ่มความสามารถในการช่วยเหลือ กรุณาระบุอุปกรณ์และเครื่องมือที่ต้องการในอื่นๆ, ถ้ามีผู้ป่วยมากมากขนาดนี้อุปกรณ์ไม่พอเนื่องจากยามปกติศบส.ไม่มีความจำเป็นต้องมีอุปกรณ์ช่วยชีวิตระดับสูงมาก เพราะไมได้มีจำนวนผู้ป่วยมาก และผู้ป่วยหนักก็ส่งต่อ สิ่งที่มีคือ set ใส่ Et 1 set AED 1 เครื่อง O2 tank ขนาดเล็ก 2 EKG 1	ท่านขาดทรัพยากรในองค์กรเพื่อเพิ่มความสามารถในการช่วยเหลือ กรุณาระบุทรัพยากรในองค์กรที่ต้องการในอื่นๆ, ตึกแถว 2 คูหา พื้นที่เล็ก มีแพทย์ประจำ 1 แพทย์part time ช่วยตรวจ OPD เช้า 1 คน พยาบาล 10 ตำแหน่ง อยู่ จริง 9 ออกชุมชน 5 คน อยู่ข้างใน4 คนในด้านทรัพยากร เรามีแค่พอที่เราคาดการณ์เช่น กระเป๋า emergency เครื่องมือ ยาจำกัด ที่พอดูแล ผู้ป่วยหนักได้ครั้งละ 1 -2 คน จากนั้นก็เบิกมาเติม ไม่ได้เตรียมเผื่อไว…	ฝึกการดูแลผู้ป่วยที่ได้รับอุบัติเหตุ หลาย ๆ กรณี	ใช่ แต่ท่านต้องการการฝึกปฏิบัติเพิ่มเติม, ใส่ท่อช่วยหายใจเพื่อส่งต่อรพ.	หน่วยงานเป็นหน่วยที่ปฏิบัติงานด้านการรักษาพยาบาล การส่งเสริมสุขภาพ ป้องกันและควบคุมโรค ฟื้นฟูสุขภาพ ให้ประชาชนในพื้นที่รับผิดชอบเขตพระนคร (6แขวง) กรณีเกิดอุบัติเหตุใหญ่ ศบส.มีพื้นที่จำกัด บุคลากรจำกัด และไม่ได้เตรียมเผื่อการเกิดอุบัติเหตุใหญ่ สามารถให้ความช่วยเหลือในผู้ป่วยได้รับบาดเจ็บเล็กน้อย เช่น ล้างแผล พันแผล ด้านจิตใจ และติดตามดูแลหลังเกิดเหตุได้
11/30/2020 15:06:06	ศูนย์บริการสาธารณสุข 11 ประดิพัทธ์	ท่านสามารถรับดูแลผู้บาดเจ็บเล็กน้อยได้, ท่านสามารถรับดูแลผู้บาดเจ็บรุนแรงด้วยการให้การดูแลเบื้องต้นให้ผู้บาดเจ็บมีอาการคงที่ ระหว่างรอการส่งต่อไปยังโรงพยาบาลขนาดใหญ่, หน่วยงานของท่านสามารถดูแลผู้ป่วยได้, หน่วยงานของท่านสามารถให้การดูแลทางจิตใจกับผู้บาดเจ็บและทีมงานได้	ท่านขาดอุปกรณ์และเครื่องมือเพื่อเพิ่มความสามารถในการช่วยเหลือ กรุณาระบุอุปกรณ์และเครื่องมือที่ต้องการในอื่นๆ, กระเป๋าemergency มีอุปกรณ์และยาในปริมาณเล็กน้อยเท่านั้น	ท่านขาดทรัพยากรในองค์กรเพื่อเพิ่มความสามารถในการช่วยเหลือ กรุณาระบุทรัพยากรในองค์กรที่ต้องการในอื่นๆ	ความรู้ด้านการดูแลผู้ป่วยฉุกเฉิน	ใช่ แต่ท่านต้องการการฝึกปฏิบัติเพิ่มเติม, ไม่มี แต่ท่านสามารถทำได้หากมีคนมาแนะนำการฝึกปฏิบัติ กรุณาระบุสิ่งที่ท่านสามารถฝึกได้ในอื่นๆ	ส่วนใหญ่เจ้าหน้าที่ที่ทำงานในศูนย์บริการสาธารณสุข ขาดประสบการณ์การดูแลผู้ป่วยฉุกเฉิน น่าจะต้องมีการอบรมฟื้นฟู
12/25/2020 10:02:47	ศูนย์บริการสาธารณสุข 12 จันทร์เที่ยง เนตรวิเศษ	ท่านสามารถรับดูแลผู้บาดเจ็บเล็กน้อยได้, หน่วยงานของท่านสามารถดูแลผู้ป่วยได้, หน่วยงานของท่านสามารถให้การดูแลทางจิตใจกับผู้บาดเจ็บและทีมงานได้, หน่วยงานของท่านสามารถประสานงานการขนย้ายผู้บาดเจ็บกลับบ้านได้	ท่านมีอุปกรณ์และเครื่องมือเพียงพอต่อการช่วยเหลือสถานการณ์พิเศษ	ท่านมีทรัพยากรในองค์กรเพียงพอต่อการช่วยเหลือสถานการณ์พิเศษ	CPR	ใช่ แต่ท่านต้องการการฝึกปฏิบัติเพิ่มเติม	อบรม CPR
11/30/2020 20:20:32	ศูนย์บริการสาธารณสุข 15 ลาดพร้าว	ท่านสามารถรับดูแลผู้บาดเจ็บเล็กน้อยได้, องค์กรของท่านมีทรัพยากรที่สามารถช่วยเหลือได้ ได้แก่ พื้นที่ อุปกรณ์และเครื่องมือทางการแพทย์, มีอุปกรณ์การช่วยเหลือเบื้องต้น เช่น เครื่องAED, ท่อช่วยหายใจ, สารน้ำ, รถส่งต่อ เป็นต้น ส่วนสามารถทำผ่าตัดเล็กเย็บแผลที่ไม่ซับซ้อนได้ แต่ขาดทรัพยากรด้านอุปกรณ์เฝือก	ท่านขาดอุปกรณ์และเครื่องมือเพื่อเพิ่มความสามารถในการช่วยเหลือ กรุณาระบุอุปกรณ์และเครื่องมือที่ต้องการในอื่นๆ, ไม่มี spinal board, splint, slab/cast, ICD, Inotroph มีแต่ adrenaline, สารน้ำมีแต่ NSS ไม่มี ringer lactate, ไม่มี spotted LAB นอกจาก DTX, ไม่มี FAST , ยาฉุกเฉินพื้นฐานมีแต่ยาที่เฉพาะลงไปยังไม่มี เช่น naloxone ,ยาฉีดหลายตัวๆทางศูนย์ฯ ไม่มี เป็นต้น	ท่านขาดทรัพยากรในองค์กรเพื่อเพิ่มความสามารถในการช่วยเหลือ กรุณาระบุทรัพยากรในองค์กรที่ต้องการในอื่นๆ, บุคลากรยังมีความรู้และประสบการณ์ไม่เยอะ แม้จะมีการจัดอบรมเบื้องต้นขั้นพื้นฐาน	การฝึกอบรมเชิงปฏิบัติให้แก่เจ้าหน้าที่ในศูนย์ฯ, การวางแผนซักซ้อมภายในศูนย์ฯ, อุปกรณ์ที่เน้นการดูแลเบื้องต้นเพื่อที่จะส่งต่อได้	ใช่ แต่ท่านต้องการการฝึกปฏิบัติเพิ่มเติม	ทางศูนย์บริการสาธารณสุข เป็นหน่วยสถานพยาบาลแบบปฐมภูมิซึ่งเน้นในแนวเชิงรุก+มีการตรวจรักษาได้เบื้องต้น ดังนั้นการจัดการด้านฉุกเฉินยังน้อยทั้งทรัพยากรบุคคล/ความรู้ความสามารถ/อุปกรณ์ แต่ทางเราก็ยังสามารถรักษาเจ็บป่วยไม่รุนแรงบางประเภทได้ และสามารถดูแลผู้ป่วยเบื้องต้นก่อนส่งต่อได้อย่างมีประสิทธิภาพได้บางประเภท
12/29/2020 12:08:11	ศูนย์บริการสาธารณสุข 2 วัดมักกะสัน	ท่านสามารถรับดูแลผู้บาดเจ็บเล็กน้อยได้, หน่วยงานของท่านสามารถประสานงานการขนย้ายผู้บาดเจ็บกลับบ้านได้	มีเฉพาะอุปกรณ์ที่จำเป็นสำหรับหน่วยบริการปฐมภูมิ	จำนวนบุคลากร เครื่องมือเฉพาะที่ต้องใช้ในกรณีที่มีสถานการณ์พิเศษ ศูนย์ฯเป็นหน่วยปฐมภูมิ จึงสามารถดูแลในเบื้องต้นได้เท่านั้น	การเพิ่มทักษะในการดูแลและให้การพยาบาลผู้ป่วยระยะวิกฤติ ในสถานการณ์พิเศษในหมู่คนจำนวนมาก	ใช่ แต่ท่านต้องการการฝึกปฏิบัติเพิ่มเติม	มีการอบรมร่วมกันระหว่างโรงพยาบาลและศูนย์บริการสาธารณสุขในพื้นที่ เพื่อสร้างเครือข่ายในการประสานเมื่อมีเหตุการณ์พิเศษเกิดขึ้น
11/10/2020 14:51:23	ศูนย์บริการสาธารณสุข 22 วัดปากบ่อ	ท่านสามารถรับดูแลผู้บาดเจ็บรุนแรงด้วยการให้การดูแลเบื้องต้นให้ผู้บาดเจ็บมีอาการคงที่ ระหว่างรอการส่งต่อไปยังโรงพยาบาลขนาดใหญ่, ท่านสามารถรับดูแลผู้ป่วยฉุกเฉินที่ไม่เกี่ยวข้องกับอุบัติเหตุเพื่อบรรเทาความหนาแน่นของห้องฉุกเฉินที่โรงพยาบาล	ท่านมีอุปกรณ์และเครื่องมือเพียงพอต่อการช่วยเหลือสถานการณ์พิเศษ	ท่านมีทรัพยากรในองค์กรเพียงพอต่อการช่วยเหลือสถานการณ์พิเศษ	รถแอมบูแลน / อุปกรณ์ CPR	ใช่ แต่ท่านต้องการการฝึกปฏิบัติเพิ่มเติม	อยากให้มีการ อบรม สัมนา เพื่อรองรับ อุบัติภัยหมู่
12/29/2020 11:53:01	ศูนย์บริการสาธารณสุข 23 สี่พระยา	เป็นหน่วยบริการปฐมภูมิที่ไม่ได้รับผู้ป่วยนอน	ท่านขาดอุปกรณ์และเครื่องมือเพื่อเพิ่มความสามารถในการช่วยเหลือ กรุณาระบุอุปกรณ์และเครื่องมือที่ต้องการในอื่นๆ	ท่านขาดทรัพยากรในองค์กรเพื่อเพิ่มความสามารถในการช่วยเหลือ กรุณาระบุทรัพยากรในองค์กรที่ต้องการในอื่นๆ	เพิ่มเติมความรู้ความเข้าใจและทักษะการปฏิบัติงานในกรณีเกิด สถานการณ์พิเศษ	ใช่ แต่ท่านต้องการการฝึกปฏิบัติเพิ่มเติม	เนื่องจากเป็นหน่วยปฐมภูมิซึ่งไม่มีการรับผู้ป่วยไว้ ดูแลรักษาจะเป็นการบริการแบบ ส่งเสริมสุขภาพป้องกัน ฟื้นฟูและรักษา พยาบาลเบื้องต้น เป็นหน่วยปฐมภูมิที่อยู่ใกล้ๆรพ.เลิดสิน และเจริญกรุงประชารักษ์ สามารส่งต่อได้กรณีฉุกเฉินและไม่มีแพทย์ประจำ ต้องจ้างแพทย์ห้วงเวลา
11/13/2020 10:44:59	ศูนย์บริการสาธารณสุข 26	ท่านสามารถรับดูแลผู้บาดเจ็บเล็กน้อยได้, ท่านสามารถรับดูแลผู้บาดเจ็บรุนแรงด้วยการให้การดูแลเบื้องต้นให้ผู้บาดเจ็บมีอาการคงที่ ระหว่างรอการส่งต่อไปยังโรงพยาบาลขนาดใหญ่, ท่านมีบุคลากรทางการแพทย์ที่สามารถเชื่อมต่อกับโรงพยาบาลเพื่อเสริมกำลังการช่วยเหลือผู้บาดเจ็บ	ท่านขาดอุปกรณ์และเครื่องมือเพื่อเพิ่มความสามารถในการช่วยเหลือ กรุณาระบุอุปกรณ์และเครื่องมือที่ต้องการในอื่นๆ	ท่านขาดทรัพยากรในองค์กรเพื่อเพิ่มความสามารถในการช่วยเหลือ กรุณาระบุทรัพยากรในองค์กรที่ต้องการในอื่นๆ	อบรมให้ความรู้การให้ความช่วยเหลือเบื้องต้นแก่บุคลากรทุกคนและการฝึกทักษะให้กับทีมบุคลากรทางการแพทย์ในการช่วยเหลือผู้ป่วยที่มีภาวะฉุกเฉินรุนแรง	ใช่ แต่ท่านต้องการการฝึกปฏิบัติเพิ่มเติม	เห็นด้วยในการพัฒนาองค์กรให้มีความพร้อมในการให้ความช่วยเหลือร่วมกันกรณีอุบัติเหตุหมู่
12/4/2020 11:07:48	ศูนย์บริการสาธารณสุข 28 กรุงธนบุรี	ท่านสามารถรับดูแลผู้บาดเจ็บเล็กน้อยได้, ท่านสามารถรับดูแลผู้บาดเจ็บรุนแรงด้วยการให้การดูแลเบื้องต้นให้ผู้บาดเจ็บมีอาการคงที่ ระหว่างรอการส่งต่อไปยังโรงพยาบาลขนาดใหญ่	ท่านขาดอุปกรณ์และเครื่องมือเพื่อเพิ่มความสามารถในการช่วยเหลือ กรุณาระบุอุปกรณ์และเครื่องมือที่ต้องการในอื่นๆ, 1มีเครื่องAED 1เครื่อง 2อุปกรณ์ใส่ท่อช่วยหายใจมี 1ชุด 3 ถังออกซิเจน1ถัง เคลื่อนที่ได้ ,ไม่มีท่อส่งออกซิเจนแบบติดผนัง	ท่านขาดทรัพยากรในองค์กรเพื่อเพิ่มความสามารถในการช่วยเหลือ กรุณาระบุทรัพยากรในองค์กรที่ต้องการในอื่นๆ, มีเภสัชกร1ท่าน มียาช่วยเกลือฉุกเฉินจำนวน จำกัด	ต้องการเพิ่มแพทย์เวชศาสตร์ฉุกเฉินและพยาบาลเวชศาสตร์ฉุกเฉิน	ใช่ แต่ท่านต้องการการฝึกปฏิบัติเพิ่มเติม	ทางศบส.มีภาระกิจ เน้นให้การดูแลผู้ป่วยรักษาเบื้องต้น เน้นการส่งเสริมสุขภาพ ป้องกันควบคุมโรค และส่งต่อในรายที่ฉุกเฉิน
12/24/2020 18:28:27	ศูนย์บริการสาธารณสุข 29 ช่วงนุชเนตร	ท่านสามารถรับดูแลผู้บาดเจ็บเล็กน้อยได้, ท่านสามารถรับดูแลผู้บาดเจ็บรุนแรงด้วยการให้การดูแลเบื้องต้นให้ผู้บาดเจ็บมีอาการคงที่ ระหว่างรอการส่งต่อไปยังโรงพยาบาลขนาดใหญ่, องค์กรของท่านมีทรัพยากรที่สามารถช่วยเหลือได้ ได้แก่ พื้นที่ อุปกรณ์และเครื่องมือทางการแพทย์, หน่วยงานของท่านสามารถดูแลผู้ป่วยได้, หน่วยงานของท่านสามารถให้การดูแลทางจิตใจกับผู้บาดเจ็บและทีมงานได้	ท่านขาดอุปกรณ์และเครื่องมือเพื่อเพิ่มความสามารถในการช่วยเหลือ กรุณาระบุอุปกรณ์และเครื่องมือที่ต้องการในอื่นๆ, มีอุปกรณ์พื้นฐาน เช่น AED ชุด CPR แต่มีจำนวนไม่มากพอ หากมีผู้บาดเจ็บจำนวนมาก	ท่านขาดทรัพยากรในองค์กรเพื่อเพิ่มความสามารถในการช่วยเหลือ กรุณาระบุทรัพยากรในองค์กรที่ต้องการในอื่นๆ	ในช่วงคลินิกนอกเวลา จะมีจำนวนเจ้าหน้าที่น้อยกว่าในเวลาค่อนข้างมาก	ใช่ แต่ท่านต้องการการฝึกปฏิบัติเพิ่มเติม	เห็นด้วยเป็นอย่างยิ่งว่ากรณีเกิดเหตุการณ์พิเศษ การติดตามข้อมูลที่เป็นปัจจุบัน เพื่อประเมินสถานการณ์มีความสำคัญมาก ช่วยให้การส่งต่อไปเครือข่ายสามารถทำได้ถูกต้องตามศักยภาพ ญาติสามารถติดตามข้อมูลของผู้บาดเจ็บได้อย่างรวดเร็ว
1/23/2021 10:09:37	ศูนย์บริการสาธารณสุข 30 วัดเจ้าอาม สำนักอนามัย กรุงเทพมหานคร	ท่านสามารถรับดูแลผู้บาดเจ็บเล็กน้อยได้, หน่วยงานของท่านสามารถประสานงานการขนย้ายผู้บาดเจ็บกลับบ้านได้	ท่านมีอุปกรณ์และเครื่องมือเพียงพอต่อการช่วยเหลือสถานการณ์พิเศษ	ท่านขาดทรัพยากรในองค์กรเพื่อเพิ่มความสามารถในการช่วยเหลือ กรุณาระบุทรัพยากรในองค์กรที่ต้องการในอื่นๆ, แพทย์ประจำที่เป็นข้าราชการในศูนย์บริการสาธารณสุข 30 วัดเจ้าอาม มีเพียง 1 คนที่ช่วยเหลือเหตุการณ์ฉุกเฉินได้ แพทย์ห้วงเวลาที่จ้างมาช่วยตรวจ ทำงานแค่ 8.00-12.00	การอบรมและฝึกซ้อมในการรับมือสถานการณ์ฉุกเฉิน ( Mass casualty) ศูนย์30 ไม่มีแผนรับมือและการฝึกซ้อมเลย	ไม่มี แต่ท่านสามารถทำได้หากมีคนมาแนะนำการฝึกปฏิบัติ กรุณาระบุสิ่งที่ท่านสามารถฝึกได้ในอื่นๆ, ฝึกรับมือ Mass casualty ดูแลผู้ป่วยบาดเจ็บเล็กน้อย	ศูนย์บริการสาธารณสุข 30 วัดเจ้าอาม เน้นงานด้านเวชศาสตร์ครอบครัว 5 ด้าน และงานสุขภาพเชิงรุก คือ งานป้องกันควบคุมโรค งานส่งเสริมสุขภาพ ตรวจรักษาโรคเบื้องต้น งานฟื้นฟูสุขภาพ และควบคุมผู้บริโภค ดังนั้นจุดแข็งคือ การทำงานในชุมชน ประสานงานกับอาสาสมัครสาธารณสุข (อสส.) จุดด้อย คือ การ Triage เคสผู้ป่วยนอก ยังไม่ค่อยมีประสิทธิภาพ ซึ่งทำให้การรับมือ Mass casualty อ่อนด้อยไปด้วย แพทย์ประจำมีเพียงคนเดียว ต้อ…
12/24/2020 14:04:49	ศูนย์บริการสาธารณสุข 34 โพธิ์ศรี	ท่านสามารถรับดูแลผู้บาดเจ็บเล็กน้อยได้, หน่วยงานของท่านสามารถให้การดูแลทางจิตใจกับผู้บาดเจ็บและทีมงานได้	มีอุปกรณ์และเครื่องมือเพียงพอในการปฐมพยาบาลเบื้องต้น	ท่านขาดทรัพยากรในองค์กรเพื่อเพิ่มความสามารถในการช่วยเหลือ กรุณาระบุทรัพยากรในองค์กรที่ต้องการในอื่นๆ	ศูนย์บริการสาธารณสุขมีพยาบาลวิชาชีพที่มีองค์ความรู้และทักษะในการปฐมพยาบาลเบื้องต้นได้	ใช่ แต่ท่านต้องการการฝึกปฏิบัติเพิ่มเติม	ไม่มี
12/28/2020 10:27:46	ศูนย์บริการสาธารณสุข 35 หัวหมาก	ท่านสามารถรับดูแลผู้บาดเจ็บเล็กน้อยได้, ท่านมีบุคลากรทางการแพทย์ที่สามารถเชื่อมต่อกับโรงพยาบาลเพื่อเสริมกำลังการช่วยเหลือผู้บาดเจ็บ	ท่านมีอุปกรณ์และเครื่องมือเพียงพอต่อการช่วยเหลือสถานการณ์พิเศษ	ท่านขาดทรัพยากรในองค์กรเพื่อเพิ่มความสามารถในการช่วยเหลือ กรุณาระบุทรัพยากรในองค์กรที่ต้องการในอื่นๆ, ขาดรถพยาบาลฉุกเฉิน	มีอบรมเรื่องCPRและเคลื่อนย้ายผู้ป่วยกรณีไฟไหม้ปีละครั้ง	ใช่ แต่ท่านต้องการการฝึกปฏิบัติเพิ่มเติม	น่ามีนิยามคำว่าทรัพยากรหมายถึงอะไรด้วยครับ
11/24/2020 11:09:48	ศูนย์บริการสาธารณสุข 36บุคคโล	ท่านสามารถรับดูแลผู้บาดเจ็บเล็กน้อยได้, ท่านมีบุคลากรทางการแพทย์ที่สามารถเชื่อมต่อกับโรงพยาบาลเพื่อเสริมกำลังการช่วยเหลือผู้บาดเจ็บ, หน่วยงานของท่านสามารถดูแลผู้ป่วยได้, หน่วยงานของท่านสามารถให้การดูแลทางจิตใจกับผู้บาดเจ็บและทีมงานได้	ท่านขาดอุปกรณ์และเครื่องมือเพื่อเพิ่มความสามารถในการช่วยเหลือ กรุณาระบุอุปกรณ์และเครื่องมือที่ต้องการในอื่นๆ	ท่านขาดทรัพยากรในองค์กรเพื่อเพิ่มความสามารถในการช่วยเหลือ กรุณาระบุทรัพยากรในองค์กรที่ต้องการในอื่นๆ	การเคลื่อนย้ายผู้บาดเจ็บ การช่วยชีวิตผู้ป่วย	ใช่ แต่ท่านต้องการการฝึกปฏิบัติเพิ่มเติม	ไม่มี
12/29/2020 14:36:14	ศูนย์บริการสาธารณสุข 39 ราษฎร์บูรณะ	ท่านสามารถรับดูแลผู้บาดเจ็บเล็กน้อยได้, หน่วยงานของท่านสามารถให้การดูแลทางจิตใจกับผู้บาดเจ็บและทีมงานได้	ท่านขาดอุปกรณ์และเครื่องมือเพื่อเพิ่มความสามารถในการช่วยเหลือ กรุณาระบุอุปกรณ์และเครื่องมือที่ต้องการในอื่นๆ, ขาดอุปกรณ์และเครื่องมือสำหรับเข้าเฝือก ส่วนอุปกรณ์และเครื่องมือที่มีไม่เพียงพอเช่น อุปกรณ์และเครื่องมือช่วยหายใจ	ท่านมีทรัพยากรในองค์กรเพียงพอต่อการช่วยเหลือสถานการณ์พิเศษ	ความรู้ใหม่ๆเพื่อเพิ่มศักยภาพของเจ้าหน้าที่ในการให้การดูแผู้บาดเจ็บ	ใช่ แต่ท่านต้องการการฝึกปฏิบัติเพิ่มเติม	งานวิจัยนี้มีส่วนช่วยให้ทางหน่วยงานได้สำรวจความพร้อมในการให้ความช่วยเหลือกรณีอุบัติภัยหมู่ และความรู้ความสามารถของตนเองในการเป็นผู้ให้ความร่วมมือช่วยเหลือผู้บาดเจ็บ
11/12/2020 12:06:22	ศูนย์บริการสาธารณสุข 40 บางแค	ท่านสามารถรับดูแลผู้บาดเจ็บเล็กน้อยได้, ท่านมีบุคลากรทางการแพทย์ที่สามารถเชื่อมต่อกับโรงพยาบาลเพื่อเสริมกำลังการช่วยเหลือผู้บาดเจ็บ, องค์กรของท่านมีทรัพยากรที่สามารถช่วยเหลือได้ ได้แก่ พื้นที่ อุปกรณ์และเครื่องมือทางการแพทย์, หน่วยงานของท่านสามารถทำผ่าตัดเล็ก เย็บแผล หรือใส่เฝือกกรณีกระดูกหักที่ไม่ซับซ้อน, หน่วยงานของท่านสามารถดูแลผู้ป่วยได้, หน่วยงานของท่านสามารถให้การดูแลทางจิตใจกับผู้บาดเจ็บแล…	ท่านมีอุปกรณ์และเครื่องมือเพียงพอต่อการช่วยเหลือสถานการณ์พิเศษ	ท่านขาดทรัพยากรในองค์กรเพื่อเพิ่มความสามารถในการช่วยเหลือ กรุณาระบุทรัพยากรในองค์กรที่ต้องการในอื่นๆ, ความรู้ ทักษะ การช่วยเหลือในสถานการณ์ พิเศษ	ความรู้ และ ทักษะ	ไม่มี แต่ท่านสามารถทำได้หากมีคนมาแนะนำการฝึกปฏิบัติ กรุณาระบุสิ่งที่ท่านสามารถฝึกได้ในอื่นๆ	1.หัวข้อคำถาม ดูซ้ำซ้อน แยกไม่ออก ในการตอบ 2.หน่วยงานเราเป็นสถานพยาบาล ปฐมภูมิ ที่ไม่มีการรับผป.ไว้ค้างคืน มีแพทย์ เพียง2ท่าน ศักยภาพ ย่อมไม่มากเท่ารพ. ในด้านการรับมือกับการเจ็บป่วย ฉุกเฉิน ทั่วไป และ อุบัติเหตุ หรือสาธารณภัยที่รุนแรง แบบพิเศษ (สถานการณ์พิเศษคือ อะไร? ไม่ชัดเจน) คำตอบที่มีให้เลือก ก็ไม่เพียงพอ ในการแยก ศักยภาพ อาจสรุป ได้ไม่ตรงกับความสามารถ ศักยภาพจริง ที่เรามี และจะช่วยเหลือได้น…
12/25/2020 12:49:58	ศูนย์บริการสาธารณสุข 48 นาควัชระอุทิศ	ท่านสามารถรับดูแลผู้บาดเจ็บรุนแรงด้วยการให้การดูแลเบื้องต้นให้ผู้บาดเจ็บมีอาการคงที่ ระหว่างรอการส่งต่อไปยังโรงพยาบาลขนาดใหญ่, ท่านมีบุคลากรทางการแพทย์ที่สามารถเชื่อมต่อกับโรงพยาบาลเพื่อเสริมกำลังการช่วยเหลือผู้บาดเจ็บ, องค์กรของท่านมีทรัพยากรที่สามารถช่วยเหลือได้ ได้แก่ พื้นที่ อุปกรณ์และเครื่องมือทางการแพทย์, หน่วยงานของท่านสามารถทำผ่าตัดเล็ก เย็บแผล หรือใส่เฝือกกรณีกระดูกหักที่ไม่ซับซ้อน, หน่ว…	ท่านมีอุปกรณ์และเครื่องมือเพียงพอต่อการช่วยเหลือสถานการณ์พิเศษ	ท่านมีทรัพยากรในองค์กรเพียงพอต่อการช่วยเหลือสถานการณ์พิเศษ	บุคคลากร ทต้องได้รับการอบรม ใหม่ทั้งหมด เนื่องจาก เป็นงาน ที่ไม่ได้ปฎิบัติ เป็นประจำ	ไม่มี แต่ท่านสามารถทำได้หากมีคนมาแนะนำการฝึกปฏิบัติ กรุณาระบุสิ่งที่ท่านสามารถฝึกได้ในอื่นๆ	เจ้าหน้าที่มีน้อย งานที่ต้องรับผิดชอบประจำก็ขาดคน และ งานล้นมือกันอยู่แล้ว ถ้าบังคับ ให้ทำ ก็ต้องทำ แต่ถ้าเลือกได้ ต้องเพิ่มอะตรากำลัง เจ้าหน้าที่ ประจำ ห้องฉุกเฉิน
12/28/2020 9:09:22	ศูนย์บริการสาธารณสุข 50 บึงกุ่ม	ท่านสามารถรับดูแลผู้บาดเจ็บเล็กน้อยได้, ท่านมีบุคลากรทางการแพทย์ที่สามารถเชื่อมต่อกับโรงพยาบาลเพื่อเสริมกำลังการช่วยเหลือผู้บาดเจ็บ, หน่วยงานของท่านสามารถให้การดูแลทางจิตใจกับผู้บาดเจ็บและทีมงานได้, หน่วยงานของท่านสามารถประสานงานการขนย้ายผู้บาดเจ็บกลับบ้านได้	ท่านขาดอุปกรณ์และเครื่องมือเพื่อเพิ่มความสามารถในการช่วยเหลือ กรุณาระบุอุปกรณ์และเครื่องมือที่ต้องการในอื่นๆ, อุปกรณ์ advance CPR	ท่านขาดทรัพยากรในองค์กรเพื่อเพิ่มความสามารถในการช่วยเหลือ กรุณาระบุทรัพยากรในองค์กรที่ต้องการในอื่นๆ, แพทย์เฉพาะทาง เช่นศัลยแพทย์	แพทย์ พยาบาล การช่วยเหลือฉุกเฉิน เมื่อเกิดอุบัติภัยหมู่เช่น อุบัติเหตุใหญ่ สารเคมี	ไม่มี แต่ท่านสามารถทำได้หากมีคนมาแนะนำการฝึกปฏิบัติ กรุณาระบุสิ่งที่ท่านสามารถฝึกได้ในอื่นๆ	ในกรณีจำเป็น หน่วยงานสามารถประสานขอความช่วยเหลือต่างๆจากผู้บริหาร สำนักอนามัยได้
11/22/2020 11:18:12	ศูนย์บริการสาธารณสุข 56 ทับเจริญ	ท่านสามารถรับดูแลผู้บาดเจ็บเล็กน้อยได้, ท่านสามารถรับดูแลผู้บาดเจ็บรุนแรงด้วยการให้การดูแลเบื้องต้นให้ผู้บาดเจ็บมีอาการคงที่ ระหว่างรอการส่งต่อไปยังโรงพยาบาลขนาดใหญ่, ท่านสามารถรับดูแลผู้ป่วยฉุกเฉินที่ไม่เกี่ยวข้องกับอุบัติเหตุเพื่อบรรเทาความหนาแน่นของห้องฉุกเฉินที่โรงพยาบาล, หน่วยงานของท่านสามารถให้การดูแลทางจิตใจกับผู้บาดเจ็บและทีมงานได้	เป็นปฐมภูมิ มีอุปกรณ์เบื้องต้น แล้วรีบส่งต่อรพ.	เช่นเดียวกับข้อ 2.1	มีเพียงพอ ในระดับปฐมภูมิ	ใช่ แต่ท่านต้องการการฝึกปฏิบัติเพิ่มเติม	ศบส.เป็นปฐมภูมิ พร้อมช่วยเหลือเบื้องต้นอย่างถูกต้อง แล้วรีบส่งต่อ ดังนั้นต้องขอให้ช่วยจัดการเรืองเครือข่าย และความรวดเร็วในการมาถึงที่เกิดเหตุเพือช่วยเหลือได้ทันท่วงที
11/12/2020 10:47:00	ศูนย์บริการสาธารณสุข 57 บุญเรือง ล้ำเลิศ	ท่านสามารถรับดูแลผู้บาดเจ็บเล็กน้อยได้, ท่านสามารถรับดูแลผู้ป่วยฉุกเฉินที่ไม่เกี่ยวข้องกับอุบัติเหตุเพื่อบรรเทาความหนาแน่นของห้องฉุกเฉินที่โรงพยาบาล, หน่วยงานของท่านสามารถให้การดูแลทางจิตใจกับผู้บาดเจ็บและทีมงานได้, หน่วยงานของท่านสามารถประสานงานการขนย้ายผู้บาดเจ็บกลับบ้านได้	มีอุปกรณ์พื้นฐาน	ทรัพยากรเพียงพอในสถานการณ์ปกติ	จำนวนเจ้าหน้าที่	ไม่มี แต่ท่านสามารถทำได้หากมีคนมาแนะนำการฝึกปฏิบัติ กรุณาระบุสิ่งที่ท่านสามารถฝึกได้ในอื่นๆ	ไม่มี
11/10/2020 14:54:53	ศูนย์บริการสาธารณสุข 61 สังวาลย์ทัสนารมย์ สำนักอนามัยกทม	ท่านสามารถรับดูแลผู้บาดเจ็บเล็กน้อยได้, ท่านสามารถรับดูแลผู้ป่วยฉุกเฉินที่ไม่เกี่ยวข้องกับอุบัติเหตุเพื่อบรรเทาความหนาแน่นของห้องฉุกเฉินที่โรงพยาบาล	มีอุปกรณ์เบื้องต้น เช่น EKG ,AED , BP, O2 SATเป็นต้น	ท่านขาดทรัพยากรในองค์กรเพื่อเพิ่มความสามารถในการช่วยเหลือ กรุณาระบุทรัพยากรในองค์กรที่ต้องการในอื่นๆ, แพทย์ เภสัชกร พยาบาล เป็นต้น	ด้านเวชศาสตร์ฉุกเฉิน	ใช่ แต่ท่านต้องการการฝึกปฏิบัติเพิ่มเติม	เป็นหน่วยบริการปฐมภูมิ สามารถดูแลฉุกเฉินเบื้องต้นได้
12/28/2020 15:09:19	ศูนย์บริการสาธารณสุข 65	ท่านสามารถรับดูแลผู้บาดเจ็บเล็กน้อยได้, ท่านสามารถรับดูแลผู้บาดเจ็บรุนแรงด้วยการให้การดูแลเบื้องต้นให้ผู้บาดเจ็บมีอาการคงที่ ระหว่างรอการส่งต่อไปยังโรงพยาบาลขนาดใหญ่	ท่านขาดอุปกรณ์และเครื่องมือเพื่อเพิ่มความสามารถในการช่วยเหลือ กรุณาระบุอุปกรณ์และเครื่องมือที่ต้องการในอื่นๆ	ท่านขาดทรัพยากรในองค์กรเพื่อเพิ่มความสามารถในการช่วยเหลือ กรุณาระบุทรัพยากรในองค์กรที่ต้องการในอื่นๆ	ต้องการการอบรมเพิ่มเติม ขาดความเชี่ยวชาญ	ใช่ แต่ท่านต้องการการฝึกปฏิบัติเพิ่มเติม	ส่วนใหญ่เป็นการช่วยเหลือเบื้องต้น การป้องกันและสอบสวนโรค
12/25/2020 15:50:18	ศูนย์บริการสาธารณสุข 8 บุญรอดรุ่งเรือง	ท่านสามารถรับดูแลผู้บาดเจ็บเล็กน้อยได้, ท่านสามารถรับดูแลผู้ป่วยฉุกเฉินที่ไม่เกี่ยวข้องกับอุบัติเหตุเพื่อบรรเทาความหนาแน่นของห้องฉุกเฉินที่โรงพยาบาล, หน่วยงานของท่านสามารถทำผ่าตัดเล็ก เย็บแผล หรือใส่เฝือกกรณีกระดูกหักที่ไม่ซับซ้อน, หน่วยงานของท่านสามารถดูแลผู้ป่วยได้, หน่วยงานของท่านสามารถให้การดูแลทางจิตใจกับผู้บาดเจ็บและทีมงานได้, ไม่สามารถใส่เฝือกได้	มีเครื่องมือจำกัดสามารถช่วยเหลือเบื้องต้นได้เช่น ETC เย็บแผลล้างแผล CPR เบื้องต้นได้ มีบางรายการ เช้นใส่tube	บุคลากรสามารถทำ basic CPR ได้ ท่านขาดทรัพยากรในองค์กรเพื่อเพิ่มความสามารถในการช่วยเหลือ กรุณาระบุทรัพยากรในองค์กรที่ต้องการในอื่นๆ	Advance CPR	ไม่มี แต่ท่านสามารถทำได้หากมีคนมาแนะนำการฝึกปฏิบัติ กรุณาระบุสิ่งที่ท่านสามารถฝึกได้ในอื่นๆ ใช่ แต่ท่านต้องการการฝึกปฏิบัติเพิ่มเติม	เจ้าหน้าที่ ขาดประสบการณ์ในการช่วยเหลือผู้ประสบอุบัติเหตุขนาดใหญ่ที่รุนแรงและมีอาการหนักแต่สามารถช่วยเหลือในเขตเบื้องต้นที่มีอุบัติเหตุบาดเจ็บเล็กน้อย ได้
12/29/2020 11:53:08	ศูนย์บริการสาธารณสุข 9 ประชาธิปไตย	ท่านสามารถรับดูแลผู้บาดเจ็บเล็กน้อยได้, ท่านสามารถรับดูแลผู้บาดเจ็บรุนแรงด้วยการให้การดูแลเบื้องต้นให้ผู้บาดเจ็บมีอาการคงที่ ระหว่างรอการส่งต่อไปยังโรงพยาบาลขนาดใหญ่, หน่วยงานของท่านสามารถดูแลผู้ป่วยได้, หน่วยงานของท่านสามารถให้การดูแลทางจิตใจกับผู้บาดเจ็บและทีมงานได้	ท่านขาดอุปกรณ์และเครื่องมือเพื่อเพิ่มความสามารถในการช่วยเหลือ กรุณาระบุอุปกรณ์และเครื่องมือที่ต้องการในอื่นๆ, ยาฉีด เครื่อง defibrillator จำนวนของน้ำเกลือในStock เครื่อง Set Load IV	ท่านขาดทรัพยากรในองค์กรเพื่อเพิ่มความสามารถในการช่วยเหลือ กรุณาระบุทรัพยากรในองค์กรที่ต้องการในอื่นๆ, รถพยาบาล อุปกรณ์เครื่องช่วยมีในวงจำกัดเนื่องจากเป็นศูนย์อนามัย	การช่วยชีวิตผู้ป่วยขั้นสูง	ใช่ แต่ท่านต้องการการฝึกปฏิบัติเพิ่มเติม	น่าจะมีหน่วยงานที่จัดการอบรมเรื่องการช่วยชีวิตผู้ป่วยขั้นสูงทุกปี ให้กับศูนย์บริการสาธารณสุข ควรมีการจัดอบรม
11/11/2020 15:32:24	ศูนย์บริการสาธารณสุข10สุขุมวิท	ท่านสามารถรับดูแลผู้บาดเจ็บเล็กน้อยได้, ท่านสามารถรับดูแลผู้บาดเจ็บรุนแรงด้วยการให้การดูแลเบื้องต้นให้ผู้บาดเจ็บมีอาการคงที่ ระหว่างรอการส่งต่อไปยังโรงพยาบาลขนาดใหญ่	ท่านขาดอุปกรณ์และเครื่องมือเพื่อเพิ่มความสามารถในการช่วยเหลือ กรุณาระบุอุปกรณ์และเครื่องมือที่ต้องการในอื่นๆ, เครื่องdefiblitation เครืองช่วยหายใจ รถambulance	ท่านมีทรัพยากรในองค์กรเพียงพอต่อการช่วยเหลือสถานการณ์พิเศษ, ท่านขาดทรัพยากรในองค์กรเพื่อเพิ่มความสามารถในการช่วยเหลือ กรุณาระบุทรัพยากรในองค์กรที่ต้องการในอื่นๆ, บุคลากรที่เชี่ยวชาฐมีทักษะการช่วยเหลือผู้ป่วยฉุุกเฉินที่มีภาวะวิกฤต	ความสามารถในการข่วยเหลือผู้ป่วยฉุกเฉินขั้นadvance	ใช่ แต่ท่านต้องการการฝึกปฏิบัติเพิ่มเติม	ขีดความสามารถของหน่วยบริการปฐมภูมิหัวใจคือแพทย์ที่มีทักษะความรู้ความสามารถและจิตวิญญานดูแลผู้รับบริการ
12/29/2020 11:13:32	ศูนย์บริการสาธารณสุข14แก้ว สีบุญเรือง	ท่านสามารถรับดูแลผู้บาดเจ็บเล็กน้อยได้, หน่วยงานของท่านสามารถดูแลผู้ป่วยได้, หน่วยงานของท่านสามารถให้การดูแลทางจิตใจกับผู้บาดเจ็บและทีมงานได้, หน่วยงานของท่านสามารถประสานงานการขนย้ายผู้บาดเจ็บกลับบ้านได้	มีแต่ขึ้นกับสถานการณ์	มีแต่ขึ้นกับสถานการณ์	ความรู้และทักษะในสถานการณ์พิเศษ	ใช่ แต่ท่านต้องการการฝึกปฏิบัติเพิ่มเติม	ไม่เข้าใจว่าสถานการณ์พิเศษคืออะไร
11/26/2020 20:57:57	ศูนย์บริการสาธารณสุข33 วัดหงส์รัตนาราม	ท่านสามารถรับดูแลผู้บาดเจ็บเล็กน้อยได้, หน่วยงานของท่านสามารถดูแลผู้ป่วยได้, หน่วยงานของท่านสามารถให้การดูแลทางจิตใจกับผู้บาดเจ็บและทีมงานได้	ท่านขาดอุปกรณ์และเครื่องมือเพื่อเพิ่มความสามารถในการช่วยเหลือ กรุณาระบุอุปกรณ์และเครื่องมือที่ต้องการในอื่นๆ, ไม่มียาและอุปกรณ์กู้ชีพมากพอสำหรับอุบัติเหตุหมู่(ปกติ หากมีผป.ต้องให้ออกซิเจน พ่นยา ให้สารน้ำ รับได้เพียง 2-3 คน	ท่านขาดทรัพยากรในองค์กรเพื่อเพิ่มความสามารถในการช่วยเหลือ กรุณาระบุทรัพยากรในองค์กรที่ต้องการในอื่นๆ, กำลังคนเมื่อเกิดอุบัติเหตุหมู่ คือมีพยาบาลประมาณ 10 คน แต่ปฏิบัติงานในหน้าที่ของตน หากแบ่งไปรับมือเรื่องอื่นจะกระทบงานหลัก ติ	อบรมเรื่องการดูแลผู้ป่วยอุบัติเหตุหนัก(ปกติที่ศ.ไม่ค่อยมีเคสฉุกเฉิน)	ใช่ แต่ท่านต้องการการฝึกปฏิบัติเพิ่มเติม	บริบทศบส. ไม่คุ้นเคยกับเคสฉุกเฉิน หรือการรับมือกับผู้ป่วยหนักปริมาณมาก ปกติดูแลผป แบบopd case
11/10/2020 10:59:52	ศูนย์บริการสาธารณสุข42	ท่านสามารถรับดูแลผู้บาดเจ็บเล็กน้อยได้	ท่านขาดอุปกรณ์และเครื่องมือเพื่อเพิ่มความสามารถในการช่วยเหลือ กรุณาระบุอุปกรณ์และเครื่องมือที่ต้องการในอื่นๆ	ท่านขาดทรัพยากรในองค์กรเพื่อเพิ่มความสามารถในการช่วยเหลือ กรุณาระบุทรัพยากรในองค์กรที่ต้องการในอื่นๆ	การช่วยชีวิตในภาวะวิกฤติ	ใช่ แต่ท่านต้องการการฝึกปฏิบัติเพิ่มเติม	หน่วยงานเป็นศูนย์บริการสาธารณสุข ที่ดูแลผู้ป่วยปฐมภูมิ การรักษาผู้ป่วยเรื้อรังและด้านการส่งเสริมควบคุมโรค ถ้าหากให้การดูแลผู้ป่วยอุบัติเหตุฉุกเฉินที่เป็นหมู่คงไม่พร้อมทั้งด้านบุคลากรและเครื่องมือแพทย์
11/13/2020 8:54:32	ศูนย์บริการสาธารณสุข53ทุ่งสองห้อง	ท่านสามารถรับดูแลผู้บาดเจ็บเล็กน้อยได้, ท่านสามารถรับดูแลผู้บาดเจ็บรุนแรงด้วยการให้การดูแลเบื้องต้นให้ผู้บาดเจ็บมีอาการคงที่ ระหว่างรอการส่งต่อไปยังโรงพยาบาลขนาดใหญ่, หน่วยงานของท่านสามารถให้การดูแลทางจิตใจกับผู้บาดเจ็บและทีมงานได้, หน่วยงานของท่านสามารถประสานงานการขนย้ายผู้บาดเจ็บกลับบ้านได้	ท่านขาดอุปกรณ์และเครื่องมือเพื่อเพิ่มความสามารถในการช่วยเหลือ กรุณาระบุอุปกรณ์และเครื่องมือที่ต้องการในอื่นๆ	ท่านมีทรัพยากรในองค์กรเพียงพอต่อการช่วยเหลือสถานการณ์พิเศษ	การจัดการเพิื่อช่วยเหลือกรณีเกิดสาธารณะภัย	ใช่ แต่ท่านต้องการการฝึกปฏิบัติเพิ่มเติม	ถ้ามีการอบรมอย่างให้เชิญศูนย์ร่วมอบรมด้วยค่ะ
12/29/2020 13:21:55	ศูนย์บริการสาธารณสุข64คลองสามวา	ท่านสามารถรับดูแลผู้บาดเจ็บเล็กน้อยได้, หน่วยงานของท่านสามารถให้การดูแลทางจิตใจกับผู้บาดเจ็บและทีมงานได้, หน่วยงานของท่านสามารถประสานงานการขนย้ายผู้บาดเจ็บกลับบ้านได้	ท่านมีอุปกรณ์และเครื่องมือเพียงพอต่อการช่วยเหลือสถานการณ์พิเศษ, ท่านขาดอุปกรณ์และเครื่องมือเพื่อเพิ่มความสามารถในการช่วยเหลือ กรุณาระบุอุปกรณ์และเครื่องมือที่ต้องการในอื่นๆ	ท่านมีทรัพยากรในองค์กรเพียงพอต่อการช่วยเหลือสถานการณ์พิเศษ	Simple triage ,transport	ไม่มี แต่ท่านสามารถทำได้หากมีคนมาแนะนำการฝึกปฏิบัติ กรุณาระบุสิ่งที่ท่านสามารถฝึกได้ในอื่นๆ	-

## Sheet: Private clinics
Private clinics
Timestamp	ชื่อหน่วยพยาบาลของท่าน	1.หากเวลาที่เกิดเหตุหน่วยงานของท่านมีผู้ขึ้นปฏิบัติงานปกติ ท่านจะให้ความช่วยเหลืออะไรบ้าง	2.1. ในด้านอุปกรณ์และเครื่องมือ	2.2.ในด้านทรัพยากรในองค์กร	2.3.ในด้านเจ้าหน้าที่ ความรู้หรือทรัพยากรใดที่เจ้าหน้าที่ของท่านต้องการเพื่อเพิ่มความสามารถในการให้การดูแลผู้บาดเจ็บ	2.4.ในด้านทรัพยากรด้านความรู้ความสามารถ ท่านมีทักษะเพียงพอสำหรับการช่วยเหลือที่ท่านอยากให้ในอุบัติเหตุใหญ่เมื่อความต้องการการช่วยเหลือมากกว่าทรัพยากรที่มีหรือไม่	กรุณาให้ความเห็นเพิ่มเติม
12/15/2020 21:31:17	Clinic Dr.Nan	ท่านสามารถรับดูแลผู้บาดเจ็บเล็กน้อยได้, ท่านมีบุคลากรทางการแพทย์ที่สามารถเชื่อมต่อกับโรงพยาบาลเพื่อเสริมกำลังการช่วยเหลือผู้บาดเจ็บ, องค์กรของท่านมีทรัพยากรที่สามารถช่วยเหลือได้ ได้แก่ พื้นที่ อุปกรณ์และเครื่องมือทางการแพทย์, หน่วยงานของท่านสามารถประสานงานการขนย้ายผู้บาดเจ็บกลับบ้านได้	ท่านขาดอุปกรณ์และเครื่องมือเพื่อเพิ่มความสามารถในการช่วยเหลือ กรุณาระบุอุปกรณ์และเครื่องมือที่ต้องการในอื่นๆ	ท่านขาดทรัพยากรในองค์กรเพื่อเพิ่มความสามารถในการช่วยเหลือ กรุณาระบุทรัพยากรในองค์กรที่ต้องการในอื่นๆ	CPR และ AED	ใช่ แต่ท่านต้องการการฝึกปฏิบัติเพิ่มเติม	-
12/18/2020 18:59:15	โกลฟคลินิกเวชกรรม	ท่านสามารถรับดูแลผู้บาดเจ็บเล็กน้อยได้, หน่วยงานของท่านสามารถให้การดูแลทางจิตใจกับผู้บาดเจ็บและทีมงานได้	ท่านขาดอุปกรณ์และเครื่องมือเพื่อเพิ่มความสามารถในการช่วยเหลือ กรุณาระบุอุปกรณ์และเครื่องมือที่ต้องการในอื่นๆ	ท่านขาดทรัพยากรในองค์กรเพื่อเพิ่มความสามารถในการช่วยเหลือ กรุณาระบุทรัพยากรในองค์กรที่ต้องการในอื่นๆ	อุปกรณ์เซ็ตฉุกเฉินมีไม่เพียงพอ	ไม่มี แต่ท่านสามารถทำได้หากมีคนมาแนะนำการฝึกปฏิบัติ กรุณาระบุสิ่งที่ท่านสามารถฝึกได้ในอื่นๆ	มีพยาบาลเพียงคนเดียว
12/11/2020 12:55:15	คลินิกความงาม	ท่านสามารถรับดูแลผู้บาดเจ็บเล็กน้อยได้	ท่านขาดอุปกรณ์และเครื่องมือเพื่อเพิ่มความสามารถในการช่วยเหลือ กรุณาระบุอุปกรณ์และเครื่องมือที่ต้องการในอื่นๆ	ท่านขาดทรัพยากรในองค์กรเพื่อเพิ่มความสามารถในการช่วยเหลือ กรุณาระบุทรัพยากรในองค์กรที่ต้องการในอื่นๆ	พยาบาลที่มีความรู้ในการช่วยปฐมพยาบาล	ใช่ แต่ท่านต้องการการฝึกปฏิบัติเพิ่มเติม	ทีมงานที่มีความสามารถในการช่วยเหลือ
12/10/2020 15:25:24	คลินิกเฉพาะทางด้านเวชกรรม อายุรศาสตร์	ท่านสามารถรับดูแลผู้ป่วยฉุกเฉินที่ไม่เกี่ยวข้องกับอุบัติเหตุเพื่อบรรเทาความหนาแน่นของห้องฉุกเฉินที่โรงพยาบาล	ท่านขาดอุปกรณ์และเครื่องมือเพื่อเพิ่มความสามารถในการช่วยเหลือ กรุณาระบุอุปกรณ์และเครื่องมือที่ต้องการในอื่นๆ	ท่านขาดทรัพยากรในองค์กรเพื่อเพิ่มความสามารถในการช่วยเหลือ กรุณาระบุทรัพยากรในองค์กรที่ต้องการในอื่นๆ	คลินิกไม่ได้เซตไว้รองรับการบาดเจ็บเลยค่ะ	ใช่ แต่ท่านต้องการการฝึกปฏิบัติเพิ่มเติม	ยินดีให้ความร่วมมือค่ะ
12/7/2020 10:50:15	คลินิกบัวจันทร์	หน่วยงานของท่านไม่สามารถให้ความช่วยเหลือได้	ท่านขาดอุปกรณ์และเครื่องมือเพื่อเพิ่มความสามารถในการช่วยเหลือ กรุณาระบุอุปกรณ์และเครื่องมือที่ต้องการในอื่นๆ	ท่านขาดทรัพยากรในองค์กรเพื่อเพิ่มความสามารถในการช่วยเหลือ กรุณาระบุทรัพยากรในองค์กรที่ต้องการในอื่นๆ	ไม่มี	ไม่มี แต่ท่านสามารถทำได้หากมีคนมาแนะนำการฝึกปฏิบัติ กรุณาระบุสิ่งที่ท่านสามารถฝึกได้ในอื่นๆ	แพทย์แก่แล้ว จะปิดคลินิก ตอนนี้รับดูแลแต่คนไข้ประจำ
12/9/2020 17:52:28	คลินิกพุทธรักษา	ท่านสามารถรับดูแลผู้บาดเจ็บเล็กน้อยได้	ท่านขาดอุปกรณ์และเครื่องมือเพื่อเพิ่มความสามารถในการช่วยเหลือ กรุณาระบุอุปกรณ์และเครื่องมือที่ต้องการในอื่นๆ	ท่านขาดทรัพยากรในองค์กรเพื่อเพิ่มความสามารถในการช่วยเหลือ กรุณาระบุทรัพยากรในองค์กรที่ต้องการในอื่นๆ	CPR	ไม่มี แต่ท่านสามารถทำได้หากมีคนมาแนะนำการฝึกปฏิบัติ กรุณาระบุสิ่งที่ท่านสามารถฝึกได้ในอื่นๆ	ต้องการอบรม เรื่อง ER management
11/30/2020 12:18:49	คลินิกเวชกรรมคลองประปาการแพทย์	สามารถให้ความช่วยเหลือได้เล็กน้อยเนื่องจากคลินิคของเราไม่ได้เปิดให้บริการทุกวันและเปิดให้บริการในช่วงเวลา 8.30 -17.00 น.	ท่านขาดอุปกรณ์และเครื่องมือเพื่อเพิ่มความสามารถในการช่วยเหลือ กรุณาระบุอุปกรณ์และเครื่องมือที่ต้องการในอื่นๆ, ยา เวชภัณฑ์ และบุคลากรในการช่วยเหลือมีจำกัด	ท่านขาดทรัพยากรในองค์กรเพื่อเพิ่มความสามารถในการช่วยเหลือ กรุณาระบุทรัพยากรในองค์กรที่ต้องการในอื่นๆ, เจ้าหน้าที่ ยาและเวชภัณฑ์	ไม่มี	ไม่มี แต่ท่านสามารถทำได้หากมีคนมาแนะนำการฝึกปฏิบัติ กรุณาระบุสิ่งที่ท่านสามารถฝึกได้ในอื่นๆ, ทำแผลการเคลื่อนย้ายและส่งต่อผู้ป่วย	ศักยภาพของเรายังไม่เพียงพอในการให้ความช่วยเหลือเรื่องอุบัติเหตุฉุกเฉินเนื่องจากคลินิคของเรายังขาดบุคลากร ยาและเวชภัณฑ์ ซึ่งไม่เพียงพอ และเรายังขาดกำลังคนในการปฏิบัติงานซึ่งอาจไม่มีเวลาในการเรียนรู้เพิ่มเติม
12/10/2020 14:21:30	คลินิกเวชกรรมแพทย์อัญชัญ	ท่านสามารถรับดูแลผู้บาดเจ็บเล็กน้อยได้, หน่วยงานของท่านสามารถประสานงานการขนย้ายผู้บาดเจ็บกลับบ้านได้	ท่านขาดอุปกรณ์และเครื่องมือเพื่อเพิ่มความสามารถในการช่วยเหลือ กรุณาระบุอุปกรณ์และเครื่องมือที่ต้องการในอื่นๆ, Airway assistance, item ยามีจำกัด , อุปกรณ์ดาม เฝือก	ท่านขาดทรัพยากรในองค์กรเพื่อเพิ่มความสามารถในการช่วยเหลือ กรุณาระบุทรัพยากรในองค์กรที่ต้องการในอื่นๆ	การดูแลผู้ป่วยจากอุบัติเหตุ, trauma	ใช่ อย่างแน่นอน	แต่ละคลินิกมี facility ต่างกันมากเนื่องจากให้บริการผู้ป่วยที่แตกต่างกัน รวมถึงความเชี่ยวชาญของบุคลากรที่ดูแลได้ต่างกัน การรวบรวมคลินิกประเภทที่สามารถดูแลผู้ป่วยบาดเจ็บได้อาจต้องมีระบบ support ค่อนข้างมากรวมถึงการรณรงค์ให้ความรู้แก่คลินิกที่ไม่ได้ดูแลผู้ป่วยประเภทนี้บ่อย
12/8/2020 15:35:39	คลินิกเวชกรรมระนอง 1	ท่านสามารถรับดูแลผู้บาดเจ็บเล็กน้อยได้, ท่านสามารถรับดูแลผู้บาดเจ็บรุนแรงด้วยการให้การดูแลเบื้องต้นให้ผู้บาดเจ็บมีอาการคงที่ ระหว่างรอการส่งต่อไปยังโรงพยาบาลขนาดใหญ่, หน่วยงานของท่านสามารถให้การดูแลทางจิตใจกับผู้บาดเจ็บและทีมงานได้, หน่วยงานของท่านสามารถประสานงานการขนย้ายผู้บาดเจ็บกลับบ้านได้	ท่านมีอุปกรณ์และเครื่องมือเพียงพอต่อการช่วยเหลือสถานการณ์พิเศษ, ทำแผลถลอกได้ เย็บแผลไม่ได้ พ่นยาได้	ท่านมีทรัพยากรในองค์กรเพียงพอต่อการช่วยเหลือสถานการณ์พิเศษ, ผู้ช่วยพยาบาลพระมงกุฏ	ผู้ช่วยพยาบาล skin test พ่นยาได้ ฉีด adrenaline, dexa IV	ไม่มี แต่ท่านสามารถทำได้หากมีคนมาแนะนำการฝึกปฏิบัติ กรุณาระบุสิ่งที่ท่านสามารถฝึกได้ในอื่นๆ, ช่วย CPR ได้เบื้องต้น เนื่องจากเป็นผู้ช่วยพยาบาลจากพระมงกุฎ เสมียนจากรพ พระมงกุฎ	พอทำแผลเล็กน้อยได้ แต่ต้องรีบส่งโรงพยาบาล แนะนำให้ผู้ป่วยไปเอง หรือ รพ วิชัยยุทธ โทรบอกพยาบาลว่าจะส่งผู้ป่วยไป
12/15/2020 14:53:55	คลินิกศัลยกรรมกระดูกและข้อ ยูทูเพลย์	ท่านสามารถรับดูแลผู้บาดเจ็บเล็กน้อยได้, หน่วยงานของท่านสามารถให้การดูแลทางจิตใจกับผู้บาดเจ็บและทีมงานได้	ท่านขาดอุปกรณ์และเครื่องมือเพื่อเพิ่มความสามารถในการช่วยเหลือ กรุณาระบุอุปกรณ์และเครื่องมือที่ต้องการในอื่นๆ, จำนวนอุปกรณ์ไม่เพียงพอ	ท่านขาดทรัพยากรในองค์กรเพื่อเพิ่มความสามารถในการช่วยเหลือ กรุณาระบุทรัพยากรในองค์กรที่ต้องการในอื่นๆ, มีแพทย์ 1 คน ขาดบุคลากรที่มีทักษะ	first aids, BLS,	ไม่มี แต่ท่านสามารถทำได้หากมีคนมาแนะนำการฝึกปฏิบัติ กรุณาระบุสิ่งที่ท่านสามารถฝึกได้ในอื่นๆ	พื้นที่จำกัด ไม่มีที่จอดให้รถพยาบาล
12/3/2020 7:07:31	ใจสบายคลินิกเวชกรรม	ท่านสามารถรับดูแลผู้บาดเจ็บเล็กน้อยได้	มีแค่ทำแผลปกติ	ไม่มี	ไม่มี	ไม่มี แต่ท่านสามารถทำได้หากมีคนมาแนะนำการฝึกปฏิบัติ กรุณาระบุสิ่งที่ท่านสามารถฝึกได้ในอื่นๆ	คลินิกไม่ได้มีหัตการอื่นใด นอกจากตรวจ รักษาเบื้องต้น
11/30/2020 13:41:21	เอรียา​คลีนิก	ท่านสามารถรับดูแลผู้บาดเจ็บเล็กน้อยได้	ท่านมีอุปกรณ์และเครื่องมือเพียงพอต่อการช่วยเหลือสถานการณ์พิเศษ	ท่านมีทรัพยากรในองค์กรเพียงพอต่อการช่วยเหลือสถานการณ์พิเศษ	ผู้ช่วยแพทย์	ใช่ แต่ท่านต้องการการฝึกปฏิบัติเพิ่มเติม	ไม่มี
12/8/2020 15:44:32	พรคลินิกเวชกรรม	หน่วยงานของท่านไม่สามารถให้ความช่วยเหลือได้, เป็นคลินิก เวชศาสตร์คตรอบครัว ไม่ทำหัตถการใดๆ จะเกษียณแล้ว	ท่านขาดอุปกรณ์และเครื่องมือเพื่อเพิ่มความสามารถในการช่วยเหลือ กรุณาระบุอุปกรณ์และเครื่องมือที่ต้องการในอื่นๆ, ไม่สะดวกทำเลย	มีหมอ 3 คน ไม่มีผู้ช่วย	ไม่มี แต่ท่านสามารถทำได้หากมีคนมาแนะนำการฝึกปฏิบัติ กรุณาระบุสิ่งที่ท่านสามารถฝึกได้ในอื่นๆ	ถ้าเกิดเหตุ ไม่สะดวกรับคนไข้ หรือ ดูแลผู้บาดเจ็บเลย

## Sheet: Dental - Table 1-1
Dental Clinics
Timestamp	ชื่อคลินิกของท่าน	1.หากเวลาที่เกิดเหตุหน่วยงานของท่านมีผู้ขึ้นปฏิบัติงานปกติ ท่านจะให้ความช่วยเหลืออะไรบ้าง	2.1. ในด้านอุปกรณ์และเครื่องมือ	2.2.ในด้านทรัพยากรในองค์กร	2.3.ในด้านทรัพยากรด้านความรู้ความสามารถ คลินิกของท่านมีทักษะเพียงพอสำหรับการช่วยเหลือที่ท่านอยากให้ในอุบัติเหตุใหญ่เมื่อความต้องการการช่วยเหลือมากกว่าทรัพยากรที่มีหรือไม่	กรุณาให้ความเห็นเพิ่มเติม
11/21/2020 9:28:31	คลินิกทันตกรรมฟิน	ท่านสามารถรับดูแลผู้บาดเจ็บเล็กน้อยได้	ท่านมีอุปกรณ์และเครื่องมือเพียงพอต่อการช่วยเหลือสถานการณ์พิเศษ	ท่านขาดทรัพยากรในองค์กรเพื่อเพิ่มความสามารถในการช่วยเหลือ กรุณาระบุทรัพยากรในองค์กรที่ต้องการในอื่นๆ	ไม่มี แต่ท่านสามารถทำได้หากมีคนมาแนะนำการฝึกปฏิบัติ กรุณาระบุสิ่งที่ท่านสามารถฝึกได้ในอื่นๆ	เปนโครงการที่ดีค่ะ
11/24/2020 7:52:16		ท่านสามารถรับดูแลผู้บาดเจ็บเล็กน้อยได้, ดูแล อุบัตเหตุ ที่เกี่ยวข้องกับ ทางทันตกรรมได้	ท่านมีอุปกรณ์และเครื่องมือเพียงพอต่อการช่วยเหลือสถานการณ์พิเศษ	ท่านมีทรัพยากรในองค์กรเพียงพอต่อการช่วยเหลือสถานการณ์พิเศษ	ใช่ แต่ท่านต้องการการฝึกปฏิบัติเพิ่มเติม	อยากให้ระบุ หัตถการ ที่ต้องการให้ควาทช่วยเหลือให้ชัดเจน มากกว่านี้ เพราะ ทาง ทันตกรรม ในกรณี ที่ผู้ป่วย รู้สึกตัวมีสติดี สามารถจัดการได้
12/6/2020 2:48:50	คลินิกทันตแพทย์บุญชู	ท่านสามารถรับดูแลผู้บาดเจ็บเล็กน้อยได้	ท่านขาดอุปกรณ์และเครื่องมือเพื่อเพิ่มความสามารถในการช่วยเหลือ กรุณาระบุอุปกรณ์และเครื่องมือที่ต้องการในอื่นๆ	ท่านขาดทรัพยากรในองค์กรเพื่อเพิ่มความสามารถในการช่วยเหลือ กรุณาระบุทรัพยากรในองค์กรที่ต้องการในอื่นๆ	ไม่มี แต่ท่านสามารถทำได้หากมีคนมาแนะนำการฝึกปฏิบัติ กรุณาระบุสิ่งที่ท่านสามารถฝึกได้ในอื่นๆ	ยินดีช่วยเหลืออย่างยิ่งตามศักยภาพที่มีเลยค่ะ
12/9/2020 9:19:45	little honey dental clinic	ท่านสามารถรับดูแลผู้บาดเจ็บเล็กน้อยได้, ท่านมีบุคลากรทางการแพทย์ที่สามารถเชื่อมต่อกับโรงพยาบาลเพื่อเสริมกำลังการช่วยเหลือผู้บาดเจ็บ, หน่วยงานของท่านสามารถทำผ่าตัดเล็ก เย็บแผล หรือใส่เฝือกกรณีกระดูกหักที่ไม่ซับซ้อน, หน่วยงานของท่านสามารถให้การดูแลทางจิตใจกับผู้บาดเจ็บและทีมงานได้, หน่วยงานของท่านสามารถประสานงานการขนย้ายผู้บาดเจ็บกลับบ้านได้		ท่านมีทรัพยากรในองค์กรเพียงพอต่อการช่วยเหลือสถานการณ์พิเศษ, ล้างแผล เย็บแผล จ่ายยาแก้ปวด	ไม่มี แต่ท่านสามารถทำได้หากมีคนมาแนะนำการฝึกปฏิบัติ กรุณาระบุสิ่งที่ท่านสามารถฝึกได้ในอื่นๆ, ไม่ต้องการฝึก	ไม่มี
12/9/2020 10:58:48	Mos dental clinic	ท่านสามารถรับดูแลผู้บาดเจ็บเล็กน้อยได้	ท่านขาดอุปกรณ์และเครื่องมือเพื่อเพิ่มความสามารถในการช่วยเหลือ กรุณาระบุอุปกรณ์และเครื่องมือที่ต้องการในอื่นๆ	ท่านขาดทรัพยากรในองค์กรเพื่อเพิ่มความสามารถในการช่วยเหลือ กรุณาระบุทรัพยากรในองค์กรที่ต้องการในอื่นๆ	ไม่มี แต่ท่านสามารถทำได้หากมีคนมาแนะนำการฝึกปฏิบัติ กรุณาระบุสิ่งที่ท่านสามารถฝึกได้ในอื่นๆ	ขอให้มีการอบรมให้ความรู้เพิ่มเติม และแจกแจงระดับอุบัติเหตุที่สามารถช่วยเหลือเบื้องต้นได้กับอุบัติเหตุที่ไม่สามารถช่วยเหลือเบื้องต้น(ที่จำเป็นต้องเรียกรถพยาบาลด่วน)
12/9/2020 11:00:09	Skytrain dental clinic	ท่านสามารถรับดูแลผู้บาดเจ็บเล็กน้อยได้	ท่านขาดอุปกรณ์และเครื่องมือเพื่อเพิ่มความสามารถในการช่วยเหลือ กรุณาระบุอุปกรณ์และเครื่องมือที่ต้องการในอื่นๆ	ท่านขาดทรัพยากรในองค์กรเพื่อเพิ่มความสามารถในการช่วยเหลือ กรุณาระบุทรัพยากรในองค์กรที่ต้องการในอื่นๆ	ใช่ แต่ท่านต้องการการฝึกปฏิบัติเพิ่มเติม	ความรู้ในการช่วยเหลือเบื้องต้น อาจมีการหลงลืมในรายละเอียด จึงควรได้รับการฝึกอบรมเปนระยะๆ
12/9/2020 23:33:54	จันคลินิคทันตกรรม	ท่านสามารถรับดูแลผู้บาดเจ็บเล็กน้อยได้, หน่วยงานของท่านไม่สามารถให้ความช่วยเหลือได้	ท่านขาดอุปกรณ์และเครื่องมือเพื่อเพิ่มความสามารถในการช่วยเหลือ กรุณาระบุอุปกรณ์และเครื่องมือที่ต้องการในอื่นๆ, ถังออกซิเจน	ท่านขาดทรัพยากรในองค์กรเพื่อเพิ่มความสามารถในการช่วยเหลือ กรุณาระบุทรัพยากรในองค์กรที่ต้องการในอื่นๆ	ไม่มี แต่ท่านสามารถทำได้หากมีคนมาแนะนำการฝึกปฏิบัติ กรุณาระบุสิ่งที่ท่านสามารถฝึกได้ในอื่นๆ, ฝึกการทำCPR	ต้องการให้มีการฝึกการทำCPRทและการใช้เครื่องมือในการนี้แก่คลินิคโดย ก.สาธารณสุข อย่่างจริงจัง
12/10/2020 7:22:41	Double b dental clinic	ท่านสามารถรับดูแลผู้บาดเจ็บเล็กน้อยได้	ท่านขาดอุปกรณ์และเครื่องมือเพื่อเพิ่มความสามารถในการช่วยเหลือ กรุณาระบุอุปกรณ์และเครื่องมือที่ต้องการในอื่นๆ	ท่านขาดทรัพยากรในองค์กรเพื่อเพิ่มความสามารถในการช่วยเหลือ กรุณาระบุทรัพยากรในองค์กรที่ต้องการในอื่นๆ	ไม่มี แต่ท่านสามารถทำได้หากมีคนมาแนะนำการฝึกปฏิบัติ กรุณาระบุสิ่งที่ท่านสามารถฝึกได้ในอื่นๆ	อยากให้มีการอบรมตามคลินิกเอกชนเรื่อยๆ
12/10/2020 16:07:10	โรงพยาบาลรามาธิบดี	ท่านสามารถรับดูแลผู้บาดเจ็บเล็กน้อยได้, ท่านมีบุคลากรทางการแพทย์ที่สามารถเชื่อมต่อกับโรงพยาบาลเพื่อเสริมกำลังการช่วยเหลือผู้บาดเจ็บ, หน่วยงานของท่านสามารถทำผ่าตัดเล็ก เย็บแผล หรือใส่เฝือกกรณีกระดูกหักที่ไม่ซับซ้อน, หน่วยงานของท่านสามารถให้การดูแลทางจิตใจกับผู้บาดเจ็บและทีมงานได้, หน่วยงานของท่านสามารถประสานงานการขนย้ายผู้บาดเจ็บกลับบ้านได้	ท่านขาดอุปกรณ์และเครื่องมือเพื่อเพิ่มความสามารถในการช่วยเหลือ กรุณาระบุอุปกรณ์และเครื่องมือที่ต้องการในอื่นๆ, เครื่องDefibrillator เครื่องmonitor setเข้าเฝือก	ท่านขาดทรัพยากรในองค์กรเพื่อเพิ่มความสามารถในการช่วยเหลือ กรุณาระบุทรัพยากรในองค์กรที่ต้องการในอื่นๆ, บุคลากร​ เครื่องมือ	ใช่ แต่ท่านต้องการการฝึกปฏิบัติเพิ่มเติม, ACLS Intubation	ยินดีช่วย​บุคลากรในสาขาอื่นเท่าที่ทำได้
12/11/2020 5:48:44	ทันตกรรม รพ ทหารผ่านศึก	ท่านสามารถรับดูแลผู้บาดเจ็บเล็กน้อยได้, องค์กรของท่านมีทรัพยากรที่สามารถช่วยเหลือได้ ได้แก่ พื้นที่ อุปกรณ์และเครื่องมือทางการแพทย์, หน่วยงานของท่านสามารถดูแลผู้ป่วยได้	ท่านมีอุปกรณ์และเครื่องมือเพียงพอต่อการช่วยเหลือสถานการณ์พิเศษ	ท่านมีทรัพยากรในองค์กรเพียงพอต่อการช่วยเหลือสถานการณ์พิเศษ	ไม่มี แต่ท่านสามารถทำได้หากมีคนมาแนะนำการฝึกปฏิบัติ กรุณาระบุสิ่งที่ท่านสามารถฝึกได้ในอื่นๆ	ในรพ . มีหน่วยงานรับผิดชอบหลัก ทางทันตกรรมเป็นฝ่ายสนับสนุนเล็กๆ น้อยตามที่ได้รับมอบหมายในงาน
12/11/2020 7:13:37	คลินิกทันตกรรมปราณบุรี	ท่านสามารถรับดูแลผู้บาดเจ็บเล็กน้อยได้	ท่านขาดอุปกรณ์และเครื่องมือเพื่อเพิ่มความสามารถในการช่วยเหลือ กรุณาระบุอุปกรณ์และเครื่องมือที่ต้องการในอื่นๆ, ทำได้แค่ปฐมพยาบาลทั่วไป	ท่านขาดทรัพยากรในองค์กรเพื่อเพิ่มความสามารถในการช่วยเหลือ กรุณาระบุทรัพยากรในองค์กรที่ต้องการในอื่นๆ, ทำได้แค่ปฐมพยาบาลทั่วไป	ไม่มี แต่ท่านสามารถทำได้หากมีคนมาแนะนำการฝึกปฏิบัติ กรุณาระบุสิ่งที่ท่านสามารถฝึกได้ในอื่นๆ	ยังไม่เข้าใจวัตถุประสงค์ของแบบสอบถามครับ ปัจจุบันคลินิกมีศักยภาพเพียงพอต่อการดูแลเบื้องต้นหรือการเกิดเหตุฉุกเฉินในคลินิก แต่ไม่พร้อมจะรับกรณีมีเหตุสถานการณ์พิเศษ เนื่องจากไม่มีบุคลากรตลอดเวลา รวมทั้งไม่ได้ฝึกซ้อมกรณีอุบัติภัยหมู่ครับ
12/11/2020 15:49:03	คลินิกทันตกรรม The grand dentist	ท่านสามารถรับดูแลผู้บาดเจ็บเล็กน้อยได้, ท่านสามารถรับดูแลผู้ป่วยฉุกเฉินที่ไม่เกี่ยวข้องกับอุบัติเหตุเพื่อบรรเทาความหนาแน่นของห้องฉุกเฉินที่โรงพยาบาล, หน่วยงานของท่านสามารถให้การดูแลทางจิตใจกับผู้บาดเจ็บและทีมงานได้, หน่วยงานของท่านสามารถประสานงานการขนย้ายผู้บาดเจ็บกลับบ้านได้	ท่านมีอุปกรณ์และเครื่องมือเพียงพอต่อการช่วยเหลือสถานการณ์พิเศษ, ท่านขาดอุปกรณ์และเครื่องมือเพื่อเพิ่มความสามารถในการช่วยเหลือ กรุณาระบุอุปกรณ์และเครื่องมือที่ต้องการในอื่นๆ, เตียงผู้ป่วย ถังออกซิเจน เครื่องช่วยหายใจ	ท่านมีทรัพยากรในองค์กรเพียงพอต่อการช่วยเหลือสถานการณ์พิเศษ	ใช่ แต่ท่านต้องการการฝึกปฏิบัติเพิ่มเติม	อยากให้เจ้าหน้าที่ในคลินิกได้มีการฝึกอบรมช่วยเหลือผู้ป่วยในยามฉุกเฉิน
12/11/2020 15:52:33	คลินิก สุทธิพร	ท่านสามารถรับดูแลผู้บาดเจ็บเล็กน้อยได้	ท่านขาดอุปกรณ์และเครื่องมือเพื่อเพิ่มความสามารถในการช่วยเหลือ กรุณาระบุอุปกรณ์และเครื่องมือที่ต้องการในอื่นๆ	ท่านขาดทรัพยากรในองค์กรเพื่อเพิ่มความสามารถในการช่วยเหลือ กรุณาระบุทรัพยากรในองค์กรที่ต้องการในอื่นๆ	ไม่มี แต่ท่านสามารถทำได้หากมีคนมาแนะนำการฝึกปฏิบัติ กรุณาระบุสิ่งที่ท่านสามารถฝึกได้ในอื่นๆ	-
12/11/2020 16:50:13	พรีเมียร์ เดนทัล สตูดิโอ	ท่านสามารถรับดูแลผู้บาดเจ็บเล็กน้อยได้, ท่านสามารถรับดูแลผู้บาดเจ็บรุนแรงด้วยการให้การดูแลเบื้องต้นให้ผู้บาดเจ็บมีอาการคงที่ ระหว่างรอการส่งต่อไปยังโรงพยาบาลขนาดใหญ่, ท่านสามารถรับดูแลผู้ป่วยฉุกเฉินที่ไม่เกี่ยวข้องกับอุบัติเหตุเพื่อบรรเทาความหนาแน่นของห้องฉุกเฉินที่โรงพยาบาล, ท่านมีบุคลากรทางการแพทย์ที่สามารถเชื่อมต่อกับโรงพยาบาลเพื่อเสริมกำลังการช่วยเหลือผู้บาดเจ็บ, หน่วยงานของท่านสามารถให้การดู…	ท่านมีอุปกรณ์และเครื่องมือเพียงพอต่อการช่วยเหลือสถานการณ์พิเศษ	ท่านมีทรัพยากรในองค์กรเพียงพอต่อการช่วยเหลือสถานการณ์พิเศษ	ใช่ แต่ท่านต้องการการฝึกปฏิบัติเพิ่มเติม	ขึ้นอยู่กับว่าคลินิกมีใครช่วยประจำการบ้าง ที่คลินิกมีพยายาลด้วย เลยทำให้มั่นใจในการรับผู้ป้วยมากขึ้นค่ะ ถ้ามีแค่ทันตแพทย์ น่าจะรับได้ไม่เยอะค่ะ
12/14/2020 13:50:55	เอโอเอสเดนทอลคลินิกทันตกรรม	ท่านสามารถรับดูแลผู้บาดเจ็บเล็กน้อยได้, หน่วยงานของท่านสามารถให้การดูแลทางจิตใจกับผู้บาดเจ็บและทีมงานได้	ท่านขาดอุปกรณ์และเครื่องมือเพื่อเพิ่มความสามารถในการช่วยเหลือ กรุณาระบุอุปกรณ์และเครื่องมือที่ต้องการในอื่นๆ	ท่านขาดทรัพยากรในองค์กรเพื่อเพิ่มความสามารถในการช่วยเหลือ กรุณาระบุทรัพยากรในองค์กรที่ต้องการในอื่นๆ	ใช่ แต่ท่านต้องการการฝึกปฏิบัติเพิ่มเติม	-
12/14/2020 20:18:40	คลินิกทันตกรรมสุโขทัย	ให้ที่นั่งพักแบบไม่ค้างคืนได้ แต่ไม่มีศักยภาพในการดูแลผู้ป่วย/ผู้บาดเจ็บ	จำนวนทันตแพทย์ที่อยู่ปฏิบัติงานมีน้อย บางช่วงเวลามีเพียงคนเดียว อาจจะไม่สามารถรับมือต่อสถานการณ์พิเศษได้	บุคคลากรทั้งทันตแพทย์และผู้ช่วยมีจำกัด	ไม่พร้อมสำหรับสถานการณ์อุบัติเหตุใหญ่	กรณีอุบัติเหตุใหญ่ ความฉุกเฉินทางทันตกรรมน่าจะได้รับการรักษาในรพ.มากกว่า ศักยภาพระดับคลินิก น่าจะช่วยได้ในกรณีอุบัติเหตุเล็กน้อย
12/20/2020 12:16:25	ทันตวัน์คลินิกทันตกรรม	หน่วยงานของท่านไม่สามารถให้ความช่วยเหลือได้	ท่านขาดอุปกรณ์และเครื่องมือเพื่อเพิ่มความสามารถในการช่วยเหลือ กรุณาระบุอุปกรณ์และเครื่องมือที่ต้องการในอื่นๆ, เครื่องAED เป็นต้น	ท่านขาดทรัพยากรในองค์กรเพื่อเพิ่มความสามารถในการช่วยเหลือ กรุณาระบุทรัพยากรในองค์กรที่ต้องการในอื่นๆ	ใช่ แต่ท่านต้องการการฝึกปฏิบัติเพิ่มเติม	อยากให้มีการอบรมในการช่วยเหลือผู้ป่วยเบื้องต้นอย่างมั่นใจ อบรมเป็นระยะๆ

## Sheet: school
School
Timestamp	ชั้นปี	ชั้นปี			ชื่อโรงเรียน	1.ท่านสามารถให้การช่วยเหลือเร่งด่วนสำหรับผู้บาดเจ็บข้อใดบ้าง	2.ท่านมีทักษะเพียงพอสำหรับการช่วยเหลือที่ท่านอยากให้ในอุบัติเหตุใหญ่หรือไม่	3.1. ในด้านอุปกรณ์และเครื่องมือ	3.2.ในด้านทรัพยากรในองค์กร	3.3.ในด้านทรัพยากรด้านความรู้ความสามารถ ท่านมีทักษะที่จำเป็นสำหรับสิ่งที่ท่านจะทำในเหตุการณ์ที่ต้องการการดูแลปริมาณมาก	กรุณาให้ความเห็นเพิ่มเติม
12/16/2020 10:08:13	อนุบาล 1	มัธยม 3		1624	คลองกุ่ม (เสรีไทย อนุสรณ์)	ท่านสามารถจัดสรรที่พักสำหรับคนจรจัด หรือผู้บาดเจ็บได้	ใช่ แต่ท่านต้องการการศึกษาเพิ่มเติม กรุณาระบุข้อเสนอแนะที่ต้องการศึกษาเพิ่มเติมในอื่นๆ, อบรมการปฐมพยาบาลเบื้องต้นให้บุคลากร	ท่านขาดอุปกรณ์และเครื่องมือเพื่อเพิ่มความสามารถในการช่วยเหลือ กรุณาระบุอุปกรณ์และเครื่องมือที่ต้องการในอื่นๆ, เครื่องมือและอุปกรณ์ปฐมพยาบาลเบื้องต้น	ท่านขาดทรัพยากรในองค์กรเพื่อเพิ่มความสามารถในการช่วยเหลือ กรุณาระบุทรัพยากรในองค์กรที่ต้องการในอื่นๆ, ผู้มีความรู้ด้านการปฐมพยาบาล	ใช่ แต่ท่านต้องการการฝึกปฏิบัติเพิ่มเติม กรุณาระบุสิ่งที่ท่านสามารถฝึกได้ในอื่นๆ, -	ควรมีการจัดฝึกอบรมการปฐมพยาบาลให้กับบุคลากร
12/9/2020 17:41:54	อนุบาล 1	ประถม 6	4 ไร่	501	คลองลำเจียกใจ	ท่านสามารถส่งเจ้าหน้าที่ไปช่วยเหลือองค์กรอื่นได้	ไม่มี แต่ท่านสามารถทำได้หากมีได้รับการศึกษาที่ตรงจุด กรุณาระบุข้อเสนอแนะที่ต้องการในอื่นๆ	ท่านขาดอุปกรณ์และเครื่องมือเพื่อเพิ่มความสามารถในการช่วยเหลือ กรุณาระบุอุปกรณ์และเครื่องมือที่ต้องการในอื่นๆ	ท่านขาดทรัพยากรในองค์กรเพื่อเพิ่มความสามารถในการช่วยเหลือ กรุณาระบุทรัพยากรในองค์กรที่ต้องการในอื่นๆ	ไม่มี แต่ท่านสามารถทำได้หากมีคนมาแนะนำการฝึกปฏิบัติ กรุณาระบุสิ่งที่ท่านสามารถฝึกได้ในอื่นๆ	บุคลากรต้องมีความรู้ใในการช่วยเหลือผู้อื่น
12/18/2020 10:24:33	อนุบาล 1	มัธยม 3	4 ไร่	557	เคหะทุ่งสองห้องวิทยา 2	ท่านสามารถรับดูแลผู้บาดเจ็บเล็กน้อยได้, ท่านสามารถช่วยดูแลเด็กได้ กรณีญาติผู้ใหญ่จำเป็นต้องให้การช่วยเหลือผู้อื่น	ไม่มี แต่ท่านสามารถทำได้หากมีได้รับการศึกษาที่ตรงจุด กรุณาระบุข้อเสนอแนะที่ต้องการในอื่นๆ	ท่านขาดอุปกรณ์และเครื่องมือเพื่อเพิ่มความสามารถในการช่วยเหลือ กรุณาระบุอุปกรณ์และเครื่องมือที่ต้องการในอื่นๆ, ไม่มีอุปกรณ์ช่วยเหลือ	ท่านขาดทรัพยากรในองค์กรเพื่อเพิ่มความสามารถในการช่วยเหลือ กรุณาระบุทรัพยากรในองค์กรที่ต้องการในอื่นๆ	ไม่มี แต่ท่านสามารถทำได้หากมีคนมาแนะนำการฝึกปฏิบัติ กรุณาระบุสิ่งที่ท่านสามารถฝึกได้ในอื่นๆ	ร.ร.สามารถเป็นสถานที่พักของผู้บาดเจ็บ รอรับการรักษาพยาบาลได้ตามโอกาส
12/17/2020 10:21:24	อนุบาล 1	มัธยม 6		2954	นาหลวง	ท่านสามารถรับดูแลผู้บาดเจ็บเล็กน้อยได้, ท่านสามารถรับดูแลผู้ป่วยที่มีอาการตกใจและให้การดูแลทางด้านจิตใจได้, ท่านสามารถจัดสรรน้ำและอาหารให้ผู้ที่ต้องการได้, ท่านสามารถช่วยดูแลเด็กได้ กรณีญาติผู้ใหญ่จำเป็นต้องให้การช่วยเหลือผู้อื่น	ไม่มี แต่ท่านสามารถทำได้หากมีได้รับการศึกษาที่ตรงจุด กรุณาระบุข้อเสนอแนะที่ต้องการในอื่นๆ	ท่านขาดอุปกรณ์และเครื่องมือเพื่อเพิ่มความสามารถในการช่วยเหลือ กรุณาระบุอุปกรณ์และเครื่องมือที่ต้องการในอื่นๆ	ท่านขาดทรัพยากรในองค์กรเพื่อเพิ่มความสามารถในการช่วยเหลือ กรุณาระบุทรัพยากรในองค์กรที่ต้องการในอื่นๆ	ไม่มี แต่ท่านสามารถทำได้หากมีคนมาแนะนำการฝึกปฏิบัติ กรุณาระบุสิ่งที่ท่านสามารถฝึกได้ในอื่นๆ	โรงเรียนสามารถช่วยเหลือนักเรียนในการปฐมพยาบาลเบื้องต้น หากเกิดเหตุที่ประเมินแล้วเกินความสามารถ ทางโรงเรียนจะดำเนินการส่งต่ออย่างเร็วที่สุด
12/7/2020 14:57:29	อนุบาล 1	มัธยม 3		550	บ้านเกาะ เขตมีนบุรี	ท่านสามารถรับดูแลผู้บาดเจ็บเล็กน้อยได้	ไม่มี แต่ท่านสามารถทำได้หากมีได้รับการศึกษาที่ตรงจุด กรุณาระบุข้อเสนอแนะที่ต้องการในอื่นๆ	ท่านขาดอุปกรณ์และเครื่องมือเพื่อเพิ่มความสามารถในการช่วยเหลือ กรุณาระบุอุปกรณ์และเครื่องมือที่ต้องการในอื่นๆ	ท่านขาดทรัพยากรในองค์กรเพื่อเพิ่มความสามารถในการช่วยเหลือ กรุณาระบุทรัพยากรในองค์กรที่ต้องการในอื่นๆ	ไม่มี แต่ท่านสามารถทำได้หากมีคนมาแนะนำการฝึกปฏิบัติ กรุณาระบุสิ่งที่ท่านสามารถฝึกได้ในอื่นๆ	จัดอบรมให้ความรู้และฝึกปฏิบัติ
12/8/2020 13:48:38	อนุบาล 1	มัธยม 6		1520	บ้านคลองบัว(เอี่ยมแสงโรจน์)	ท่านสามารถรับดูแลผู้บาดเจ็บเล็กน้อยได้, ท่านสามารถรับดูแลผู้ป่วยที่มีอาการตกใจและให้การดูแลทางด้านจิตใจได้, ท่านสามารถจัดสรรที่พักสำหรับคนจรจัด หรือผู้บาดเจ็บได้, ท่านสามารถจัดสรรน้ำและอาหารให้ผู้ที่ต้องการได้, ท่านสามารถช่วยดูแลเด็กได้ กรณีญาติผู้ใหญ่จำเป็นต้องให้การช่วยเหลือผู้อื่น, ท่านสามารถส่งเจ้าหน้าที่ไปช่วยเหลือองค์กรอื่นได้	ใช่ อย่างแน่นอน	ท่านขาดอุปกรณ์และเครื่องมือเพื่อเพิ่มความสามารถในการช่วยเหลือ กรุณาระบุอุปกรณ์และเครื่องมือที่ต้องการในอื่นๆ	ท่านขาดทรัพยากรในองค์กรเพื่อเพิ่มความสามารถในการช่วยเหลือ กรุณาระบุทรัพยากรในองค์กรที่ต้องการในอื่นๆ	ใช่ แต่ท่านต้องการการฝึกปฏิบัติเพิ่มเติม กรุณาระบุสิ่งที่ท่านสามารถฝึกได้ในอื่นๆ	ควรมีการฝึกอบรมให้กับบุคลากรให้มีความรู้พื้นฐานในการช่วยเหลือผู้อื่นกรณีเกิดการบาดเจ็บหมู่
1/5/2021 15:05:45	อนุบาล 1	ประถม 6		559	บ้านนายผล (แม้นสุวรรณอุปถัมภ์)	ท่านสามารถทำการห้ามเลือด ซ่อมบาดแผล การช่วยชีวิตและหัตถการฉุกเฉินอื่นๆได้, ท่านสามารถรับดูแลผู้บาดเจ็บเล็กน้อยได้, ท่านสามารถรับดูแลผู้ป่วยที่มีอาการตกใจและให้การดูแลทางด้านจิตใจได้, ท่านสามารถจัดสรรน้ำและอาหารให้ผู้ที่ต้องการได้, ท่านสามารถช่วยดูแลเด็กได้ กรณีญาติผู้ใหญ่จำเป็นต้องให้การช่วยเหลือผู้อื่น	ใช่ แต่ท่านต้องการการศึกษาเพิ่มเติม กรุณาระบุข้อเสนอแนะที่ต้องการศึกษาเพิ่มเติมในอื่นๆ	ท่านขาดอุปกรณ์และเครื่องมือเพื่อเพิ่มความสามารถในการช่วยเหลือ กรุณาระบุอุปกรณ์และเครื่องมือที่ต้องการในอื่นๆ	ท่านขาดทรัพยากรในองค์กรเพื่อเพิ่มความสามารถในการช่วยเหลือ กรุณาระบุทรัพยากรในองค์กรที่ต้องการในอื่นๆ	ใช่ แต่ท่านต้องการการฝึกปฏิบัติเพิ่มเติม กรุณาระบุสิ่งที่ท่านสามารถฝึกได้ในอื่นๆ	อยากให้มีการจัดอบรมให้ความรู้เพิ่มเติม
1/8/2021 9:27:07	อนุบาล 1	มัธยม 3		2500	ประชาอุทิศ (จันทาบอนุสรณ์)	ท่านสามารถรับดูแลผู้บาดเจ็บเล็กน้อยได้	ไม่มี แต่ท่านสามารถทำได้หากมีได้รับการศึกษาที่ตรงจุด กรุณาระบุข้อเสนอแนะที่ต้องการในอื่นๆ	ท่านขาดอุปกรณ์และเครื่องมือเพื่อเพิ่มความสามารถในการช่วยเหลือ กรุณาระบุอุปกรณ์และเครื่องมือที่ต้องการในอื่นๆ, รร.จะมีเพียงยาสามามัญประจำบ้าน และวัสดุทำแผลเบื้องต้น	ท่านขาดทรัพยากรในองค์กรเพื่อเพิ่มความสามารถในการช่วยเหลือ กรุณาระบุทรัพยากรในองค์กรที่ต้องการในอื่นๆ, ด้วยบุคลากรยังไม่ทีความรู้ในเคทที่ต้องดูแล ช่วยเหลือเคทหนักๆ จึงยังไม่ประสงค์ขออุปกรณ์เพิ่ม	ไม่มี แต่ท่านสามารถทำได้หากมีคนมาแนะนำการฝึกปฏิบัติ กรุณาระบุสิ่งที่ท่านสามารถฝึกได้ในอื่นๆ	โรงเรียนยินดีให้ จนท. จากโรงพยาบาลมาให้ความรู้ในด้านการให้ความช่วยเหลือผู้ประสบอุบัติเหตุเบื้องต้นแก่ครูและบุคลากร
12/9/2020 9:48:08	อนุบาล 1	ประถม 6	3 ไร่	646	ปลูกจิต	ท่านสามารถรับดูแลผู้ป่วยที่มีอาการตกใจและให้การดูแลทางด้านจิตใจได้	ไม่มี แต่ท่านสามารถทำได้หากมีได้รับการศึกษาที่ตรงจุด กรุณาระบุข้อเสนอแนะที่ต้องการในอื่นๆ	ท่านขาดอุปกรณ์และเครื่องมือเพื่อเพิ่มความสามารถในการช่วยเหลือ กรุณาระบุอุปกรณ์และเครื่องมือที่ต้องการในอื่นๆ	ท่านขาดทรัพยากรในองค์กรเพื่อเพิ่มความสามารถในการช่วยเหลือ กรุณาระบุทรัพยากรในองค์กรที่ต้องการในอื่นๆ	ไม่มี แต่ท่านสามารถทำได้หากมีคนมาแนะนำการฝึกปฏิบัติ กรุณาระบุสิ่งที่ท่านสามารถฝึกได้ในอื่นๆ	โรงเรียนอยู่ใกล้ศูนย์บริการสาธารณสุขลุมพินี้
12/17/2020 13:22:05	อนุบาล 1	ประถม 6		1030	พระราม๙กาญจนาภิเษก	ท่านสามารถทำการห้ามเลือด ซ่อมบาดแผล การช่วยชีวิตและหัตถการฉุกเฉินอื่นๆได้, ท่านสามารถรับดูแลผู้บาดเจ็บเล็กน้อยได้	ใช่ แต่ท่านต้องการการศึกษาเพิ่มเติม กรุณาระบุข้อเสนอแนะที่ต้องการศึกษาเพิ่มเติมในอื่นๆ, การช่วยชีวิต หัตถการฉุกเฉิน ซ่อมบาดแผล	ท่านขาดอุปกรณ์และเครื่องมือเพื่อเพิ่มความสามารถในการช่วยเหลือ กรุณาระบุอุปกรณ์และเครื่องมือที่ต้องการในอื่นๆ, อุปกรณ์การปฐมพยาบาลเบื้องต้น	ท่านขาดทรัพยากรในองค์กรเพื่อเพิ่มความสามารถในการช่วยเหลือ กรุณาระบุทรัพยากรในองค์กรที่ต้องการในอื่นๆ, อุปกรณ์ทำบาดแผล ช่วยเหลือชีวิตพื้นฐาน	ใช่ แต่ท่านต้องการการฝึกปฏิบัติเพิ่มเติม กรุณาระบุสิ่งที่ท่านสามารถฝึกได้ในอื่นๆ, การช่วยชีวิตฉุกเฉิน	การช่วยเหลือฉุกเฉินอาจมีประสบการณ์น้อย ไม่ได้ใช้หากมีโอกาสน่าจะมีการทบทวนหรือได้ศึกษาเพิ่มเติม
12/23/2020 12:28:06	อนุบาล 1	มัธยม 3		961	เพี้ยนพินอนุสรณ์ เขตบางนา กทม.	ท่านสามารถทำการห้ามเลือด ซ่อมบาดแผล การช่วยชีวิตและหัตถการฉุกเฉินอื่นๆได้, ท่านสามารถรับดูแลผู้บาดเจ็บเล็กน้อยได้, ท่านสามารถจัดสรรน้ำและอาหารให้ผู้ที่ต้องการได้, ท่านสามารถช่วยดูแลเด็กได้ กรณีญาติผู้ใหญ่จำเป็นต้องให้การช่วยเหลือผู้อื่น	ใช่ แต่ท่านต้องการการศึกษาเพิ่มเติม กรุณาระบุข้อเสนอแนะที่ต้องการศึกษาเพิ่มเติมในอื่นๆ	ท่านขาดอุปกรณ์และเครื่องมือเพื่อเพิ่มความสามารถในการช่วยเหลือ กรุณาระบุอุปกรณ์และเครื่องมือที่ต้องการในอื่นๆ	ท่านขาดทรัพยากรในองค์กรเพื่อเพิ่มความสามารถในการช่วยเหลือ กรุณาระบุทรัพยากรในองค์กรที่ต้องการในอื่นๆ	ไม่มี แต่ท่านสามารถทำได้หากมีคนมาแนะนำการฝึกปฏิบัติ กรุณาระบุสิ่งที่ท่านสามารถฝึกได้ในอื่นๆ	ต้องการได้รับการฝึกอบรมพัฒนาทักษะเพิ่มเติม
12/9/2020 10:36:02	อนุบาล 1	มัธยม 6		1623	มัธยมประชานิเวศน์	ท่านสามารถจัดสรรน้ำและอาหารให้ผู้ที่ต้องการได้	ไม่มี แต่ท่านสามารถทำได้หากมีได้รับการศึกษาที่ตรงจุด กรุณาระบุข้อเสนอแนะที่ต้องการในอื่นๆ	ท่านขาดอุปกรณ์และเครื่องมือเพื่อเพิ่มความสามารถในการช่วยเหลือ กรุณาระบุอุปกรณ์และเครื่องมือที่ต้องการในอื่นๆ	ท่านขาดทรัพยากรในองค์กรเพื่อเพิ่มความสามารถในการช่วยเหลือ กรุณาระบุทรัพยากรในองค์กรที่ต้องการในอื่นๆ	ไม่มี แต่ท่านสามารถทำได้หากมีคนมาแนะนำการฝึกปฏิบัติ กรุณาระบุสิ่งที่ท่านสามารถฝึกได้ในอื่นๆ	โรงเรียนมีเพียงห้องพยาบาลที่รองรับนักเรียนที่มีอาการป่วยเพียงเล็กน้อยและต้องการรักษาพยาบาลเบื้องต้นเท่านั้น
12/14/2020 11:42:47	อนุบาล 1	มัธยม 6		1061	มัธยมวัดสุทธาราม	ท่านสามารถทำการห้ามเลือด ซ่อมบาดแผล การช่วยชีวิตและหัตถการฉุกเฉินอื่นๆได้, ท่านสามารถรับดูแลผู้บาดเจ็บเล็กน้อยได้, ท่านสามารถช่วยดูแลเด็กได้ กรณีญาติผู้ใหญ่จำเป็นต้องให้การช่วยเหลือผู้อื่น, ท่านสามารถส่งเจ้าหน้าที่ไปช่วยเหลือองค์กรอื่นได้	ไม่มี แต่ท่านสามารถทำได้หากมีได้รับการศึกษาที่ตรงจุด กรุณาระบุข้อเสนอแนะที่ต้องการในอื่นๆ	ท่านขาดอุปกรณ์และเครื่องมือเพื่อเพิ่มความสามารถในการช่วยเหลือ กรุณาระบุอุปกรณ์และเครื่องมือที่ต้องการในอื่นๆ	ท่านขาดทรัพยากรในองค์กรเพื่อเพิ่มความสามารถในการช่วยเหลือ กรุณาระบุทรัพยากรในองค์กรที่ต้องการในอื่นๆ	ไม่มี แต่ท่านสามารถทำได้หากมีคนมาแนะนำการฝึกปฏิบัติ กรุณาระบุสิ่งที่ท่านสามารถฝึกได้ในอื่นๆ	สามารถทำได้ถ้ามีหน่วยงานให้ความรู้และสนับสนุนวัสดุอุปกรณ์
12/14/2020 13:34:55	อนุบาล 1	มัธยม 6		1433	มัธยมสุวิทย์เสรีอนุสรณ์	ท่านสามารถรับดูแลผู้บาดเจ็บเล็กน้อยได้	ไม่มี แต่ท่านสามารถทำได้หากมีได้รับการศึกษาที่ตรงจุด กรุณาระบุข้อเสนอแนะที่ต้องการในอื่นๆ	ท่านขาดอุปกรณ์และเครื่องมือเพื่อเพิ่มความสามารถในการช่วยเหลือ กรุณาระบุอุปกรณ์และเครื่องมือที่ต้องการในอื่นๆ	ท่านขาดทรัพยากรในองค์กรเพื่อเพิ่มความสามารถในการช่วยเหลือ กรุณาระบุทรัพยากรในองค์กรที่ต้องการในอื่นๆ	ไม่มี แต่ท่านสามารถทำได้หากมีคนมาแนะนำการฝึกปฏิบัติ กรุณาระบุสิ่งที่ท่านสามารถฝึกได้ในอื่นๆ	จากคำถามส่วนใหญ่จะไม่มีความสามารถจะทำได้ ขาดความรู้และทักษะ
12/9/2020 13:26:42	อนุบาล 1	มัธยม 3		1399	ราชมนตรี (ปลื้ม-เชื่อมนุกุล)	ท่านสามารถจัดสรรน้ำและอาหารให้ผู้ที่ต้องการได้	ไม่มี แต่ท่านสามารถทำได้หากมีได้รับการศึกษาที่ตรงจุด กรุณาระบุข้อเสนอแนะที่ต้องการในอื่นๆ	ท่านขาดอุปกรณ์และเครื่องมือเพื่อเพิ่มความสามารถในการช่วยเหลือ กรุณาระบุอุปกรณ์และเครื่องมือที่ต้องการในอื่นๆ	ท่านขาดทรัพยากรในองค์กรเพื่อเพิ่มความสามารถในการช่วยเหลือ กรุณาระบุทรัพยากรในองค์กรที่ต้องการในอื่นๆ	ไม่มี แต่ท่านสามารถทำได้หากมีคนมาแนะนำการฝึกปฏิบัติ กรุณาระบุสิ่งที่ท่านสามารถฝึกได้ในอื่นๆ	-
12/18/2020 12:31:08	อนุบาล 1	มัธยม 3		762	รุ่งเรืองอุปถัมภ์	ท่านสามารถรับดูแลผู้บาดเจ็บเล็กน้อยได้, ท่านสามารถช่วยดูแลเด็กได้ กรณีญาติผู้ใหญ่จำเป็นต้องให้การช่วยเหลือผู้อื่น	ไม่มี แต่ท่านสามารถทำได้หากมีได้รับการศึกษาที่ตรงจุด กรุณาระบุข้อเสนอแนะที่ต้องการในอื่นๆ	ท่านขาดอุปกรณ์และเครื่องมือเพื่อเพิ่มความสามารถในการช่วยเหลือ กรุณาระบุอุปกรณ์และเครื่องมือที่ต้องการในอื่นๆ	ท่านขาดทรัพยากรในองค์กรเพื่อเพิ่มความสามารถในการช่วยเหลือ กรุณาระบุทรัพยากรในองค์กรที่ต้องการในอื่นๆ	ไม่มี แต่ท่านสามารถทำได้หากมีคนมาแนะนำการฝึกปฏิบัติ กรุณาระบุสิ่งที่ท่านสามารถฝึกได้ในอื่นๆ	รร.ยังขาดอุปกรณ์
12/16/2020 14:47:41	อนุบาล 1	มัธยม 3		1337	โรงเรียนคลองหนองใหญ่	ท่านสามารถทำการห้ามเลือด ซ่อมบาดแผล การช่วยชีวิตและหัตถการฉุกเฉินอื่นๆได้, ท่านสามารถรับดูแลผู้บาดเจ็บเล็กน้อยได้, ท่านสามารถรับดูแลผู้ป่วยที่มีอาการตกใจและให้การดูแลทางด้านจิตใจได้, ท่านสามารถส่งเจ้าหน้าที่ไปช่วยเหลือองค์กรอื่นได้	ใช่ แต่ท่านต้องการการศึกษาเพิ่มเติม กรุณาระบุข้อเสนอแนะที่ต้องการศึกษาเพิ่มเติมในอื่นๆ	ท่านขาดอุปกรณ์และเครื่องมือเพื่อเพิ่มความสามารถในการช่วยเหลือ กรุณาระบุอุปกรณ์และเครื่องมือที่ต้องการในอื่นๆ	ท่านขาดทรัพยากรในองค์กรเพื่อเพิ่มความสามารถในการช่วยเหลือ กรุณาระบุทรัพยากรในองค์กรที่ต้องการในอื่นๆ	ใช่ แต่ท่านต้องการการฝึกปฏิบัติเพิ่มเติม กรุณาระบุสิ่งที่ท่านสามารถฝึกได้ในอื่นๆ	ควรให้เครื่องมือเพิ่มเติมแก่โรงเรียนที่บุคลากรมีทักษะการปฐมพยาบาล
12/16/2020 9:59:13	อนุบาล 1	ประถม 6		2224	โรงเรียนเคหะชุมชนลาดกระบัง	ท่านสามารถทำการห้ามเลือด ซ่อมบาดแผล การช่วยชีวิตและหัตถการฉุกเฉินอื่นๆได้, ท่านสามารถรับดูแลผู้บาดเจ็บเล็กน้อยได้, ท่านสามารถรับดูแลผู้ป่วยที่มีอาการตกใจและให้การดูแลทางด้านจิตใจได้, ท่านสามารถจัดสรรที่พักสำหรับคนจรจัด หรือผู้บาดเจ็บได้, ท่านสามารถจัดสรรน้ำและอาหารให้ผู้ที่ต้องการได้, ท่านสามารถช่วยดูแลเด็กได้ กรณีญาติผู้ใหญ่จำเป็นต้องให้การช่วยเหลือผู้อื่น, ท่านสามารถส่งเจ้าหน้าที่ไปช่วยเหลือองค…	ใช่ แต่ท่านต้องการการศึกษาเพิ่มเติม กรุณาระบุข้อเสนอแนะที่ต้องการศึกษาเพิ่มเติมในอื่นๆ	ท่านขาดอุปกรณ์และเครื่องมือเพื่อเพิ่มความสามารถในการช่วยเหลือ กรุณาระบุอุปกรณ์และเครื่องมือที่ต้องการในอื่นๆ	ท่านขาดทรัพยากรในองค์กรเพื่อเพิ่มความสามารถในการช่วยเหลือ กรุณาระบุทรัพยากรในองค์กรที่ต้องการในอื่นๆ	ไม่มี แต่ท่านสามารถทำได้หากมีคนมาแนะนำการฝึกปฏิบัติ กรุณาระบุสิ่งที่ท่านสามารถฝึกได้ในอื่นๆ	ควรจัดจนท.สาธารณสุขมาอบรมให้ความรู้และฝึกปฏิบัติปีละ2ครั้ง
12/9/2020 16:03:51	อนุบาล 1	มัธยม 3		763	โรงเรียนฉิมพลี	ท่านสามารถรับดูแลผู้บาดเจ็บเล็กน้อยได้	ใช่ แต่ท่านต้องการการศึกษาเพิ่มเติม กรุณาระบุข้อเสนอแนะที่ต้องการศึกษาเพิ่มเติมในอื่นๆ	ท่านขาดอุปกรณ์และเครื่องมือเพื่อเพิ่มความสามารถในการช่วยเหลือ กรุณาระบุอุปกรณ์และเครื่องมือที่ต้องการในอื่นๆ	ท่านขาดทรัพยากรในองค์กรเพื่อเพิ่มความสามารถในการช่วยเหลือ กรุณาระบุทรัพยากรในองค์กรที่ต้องการในอื่นๆ	ไม่มี แต่ท่านสามารถทำได้หากมีคนมาแนะนำการฝึกปฏิบัติ กรุณาระบุสิ่งที่ท่านสามารถฝึกได้ในอื่นๆ	-
12/7/2020 14:55:56	อนุบาล 1	ประถม 6		717	โรงเรียนพิชัยพัฒนา	ท่านสามารถทำการห้ามเลือด ซ่อมบาดแผล การช่วยชีวิตและหัตถการฉุกเฉินอื่นๆได้, ท่านสามารถรับดูแลผู้บาดเจ็บเล็กน้อยได้, ท่านสามารถรับดูแลผู้ป่วยที่มีอาการตกใจและให้การดูแลทางด้านจิตใจได้, ท่านสามารถช่วยดูแลเด็กได้ กรณีญาติผู้ใหญ่จำเป็นต้องให้การช่วยเหลือผู้อื่น	ไม่มี แต่ท่านสามารถทำได้หากมีได้รับการศึกษาที่ตรงจุด กรุณาระบุข้อเสนอแนะที่ต้องการในอื่นๆ	ท่านขาดอุปกรณ์และเครื่องมือเพื่อเพิ่มความสามารถในการช่วยเหลือ กรุณาระบุอุปกรณ์และเครื่องมือที่ต้องการในอื่นๆ	ท่านขาดทรัพยากรในองค์กรเพื่อเพิ่มความสามารถในการช่วยเหลือ กรุณาระบุทรัพยากรในองค์กรที่ต้องการในอื่นๆ	ไม่มี แต่ท่านสามารถทำได้หากมีคนมาแนะนำการฝึกปฏิบัติ กรุณาระบุสิ่งที่ท่านสามารถฝึกได้ในอื่นๆ	โรงเรียนบุคลากรที่มีทักษะการช่วยเหลือ
12/21/2020 14:31:00	อนุบาล 1	ประถม 6		587	โรงเรียนเพชรเกษม	ท่านสามารถรับดูแลผู้บาดเจ็บเล็กน้อยได้, ท่านสามารถรับดูแลผู้ป่วยที่มีอาการตกใจและให้การดูแลทางด้านจิตใจได้, ท่านสามารถช่วยดูแลเด็กได้ กรณีญาติผู้ใหญ่จำเป็นต้องให้การช่วยเหลือผู้อื่น	ไม่มี แต่ท่านสามารถทำได้หากมีได้รับการศึกษาที่ตรงจุด กรุณาระบุข้อเสนอแนะที่ต้องการในอื่นๆ	ท่านขาดอุปกรณ์และเครื่องมือเพื่อเพิ่มความสามารถในการช่วยเหลือ กรุณาระบุอุปกรณ์และเครื่องมือที่ต้องการในอื่นๆ	ท่านขาดทรัพยากรในองค์กรเพื่อเพิ่มความสามารถในการช่วยเหลือ กรุณาระบุทรัพยากรในองค์กรที่ต้องการในอื่นๆ, บุคลากรที่มีความรู้ด้านสุขอนามัยโดยตรง	ใช่ แต่ท่านต้องการการฝึกปฏิบัติเพิ่มเติม กรุณาระบุสิ่งที่ท่านสามารถฝึกได้ในอื่นๆ	ในการดูแลช่วยเหลือนักเรียนเบื้องต้นครูและบุคลากรสามารถปฏิบัติได้ในลักษณะการเกิดอุบัติเหตุเพียงเล็กน้อย เนื่องจากไม่มีบุคลากรที่มีความรู้ทางด้านนี้โดยตรง ซึ่งหากปฏิบัติผิดพลาดลงไปย่อมก่อให้เกิดผลเสียมากกว่าผลดี
12/15/2020 13:35:31	อนุบาล 1	ประถม 6		1218	โรงเรียนมัธยมนาคนาวาอุปถัมภ์	ท่านสามารถจัดสรรน้ำและอาหารให้ผู้ที่ต้องการได้	ใช่ แต่ท่านต้องการการศึกษาเพิ่มเติม กรุณาระบุข้อเสนอแนะที่ต้องการศึกษาเพิ่มเติมในอื่นๆ	ท่านมีอุปกรณ์และเครื่องมือเพียงพอต่อการช่วยเหลือสถานการณ์พิเศษ, ท่านขาดอุปกรณ์และเครื่องมือเพื่อเพิ่มความสามารถในการช่วยเหลือ กรุณาระบุอุปกรณ์และเครื่องมือที่ต้องการในอื่นๆ	ท่านมีสิ่งอำนวยความสะดวกเพียงพอต่อการช่วยเหลือสถานการณ์พิเศษ	ใช่ แต่ท่านต้องการการฝึกปฏิบัติเพิ่มเติม กรุณาระบุสิ่งที่ท่านสามารถฝึกได้ในอื่นๆ	ไม่มีค่ะ
12/7/2020 16:37:31	อนุบาล 1	มัธยม 3		605	โรงเรียนลอยสายอนุสรณ์	ท่านสามารถรับดูแลผู้บาดเจ็บเล็กน้อยได้, ท่านสามารถรับดูแลผู้ป่วยที่มีอาการตกใจและให้การดูแลทางด้านจิตใจได้, ท่านสามารถช่วยดูแลเด็กได้ กรณีญาติผู้ใหญ่จำเป็นต้องให้การช่วยเหลือผู้อื่น	ไม่มี แต่ท่านสามารถทำได้หากมีได้รับการศึกษาที่ตรงจุด กรุณาระบุข้อเสนอแนะที่ต้องการในอื่นๆ	ท่านขาดอุปกรณ์และเครื่องมือเพื่อเพิ่มความสามารถในการช่วยเหลือ กรุณาระบุอุปกรณ์และเครื่องมือที่ต้องการในอื่นๆ, ชุดอุปกรณ์ทำแผลเช่นกัน​ น้ำเกลือ​ เบตาดี​น​ ก๊อส​ ผ้าพันแผลพลาสเตอร์ปิดแผล	ท่านขาดทรัพยากรในองค์กรเพื่อเพิ่มความสามารถในการช่วยเหลือ กรุณาระบุทรัพยากรในองค์กรที่ต้องการในอื่นๆ, ชุดอุปกรณ์ทำแผลและอุปกรณ์ให้การพยาบาลเบื้องต้น	ไม่มี แต่ท่านสามารถทำได้หากมีคนมาแนะนำการฝึกปฏิบัติ กรุณาระบุสิ่งที่ท่านสามารถฝึกได้ในอื่นๆ	ครูและนักเรียนควรได้รับการฝึกปฏิบัติในการช่วยเหลือและดูแลผู้บาดเจ็บเบื้องต้น
12/8/2020 13:27:22	อนุบาล 1	ประถม 6		2185	โรงเรียนวัดบึงทองหลาง(ฝ่ายประถม)ซอยลาดพร้าว 101แยก41	ท่านสามารถจัดสรรน้ำและอาหารให้ผู้ที่ต้องการได้	ใช่ แต่ท่านต้องการการศึกษาเพิ่มเติม กรุณาระบุข้อเสนอแนะที่ต้องการศึกษาเพิ่มเติมในอื่นๆ	ท่านขาดอุปกรณ์และเครื่องมือเพื่อเพิ่มความสามารถในการช่วยเหลือ กรุณาระบุอุปกรณ์และเครื่องมือที่ต้องการในอื่นๆ	ท่านขาดทรัพยากรในองค์กรเพื่อเพิ่มความสามารถในการช่วยเหลือ กรุณาระบุทรัพยากรในองค์กรที่ต้องการในอื่นๆ	ไม่มี แต่ท่านสามารถทำได้หากมีคนมาแนะนำการฝึกปฏิบัติ กรุณาระบุสิ่งที่ท่านสามารถฝึกได้ในอื่นๆ	รร.มีสถานที่กว้างขวาง กรณีเกิดเหตุการณ์ ที่ต้องใช้พื้นที่สนามกว้างๆก็สามารถให้คนเข้ามาได้ ทางรร.ยินดีช่วยเหลือ ทั้งนี้เนื่อกจากเป็นรร.ของกทม.เป็นสถานที่ราชการ หากจำเป็นต้องจะใช้ต้องขออนุญาต เขตและกทม.ตามขั้นตอนของราชการ ขอสนับสนุนให้โครงการสำเร็จตามจุดประสงค์
12/15/2020 19:42:00	อนุบาล 1	มัธยม 3		875	โรงเรียนวัดบุณยประดิษฐ์	ท่านสามารถรับดูแลผู้บาดเจ็บเล็กน้อยได้	ไม่มี แต่ท่านสามารถทำได้หากมีได้รับการศึกษาที่ตรงจุด กรุณาระบุข้อเสนอแนะที่ต้องการในอื่นๆ	ไม่มีความเรื่องอุปกรณ์	ไม่มีประสบการณ์	ไม่มี แต่ท่านสามารถทำได้หากมีคนมาแนะนำการฝึกปฏิบัติ กรุณาระบุสิ่งที่ท่านสามารถฝึกได้ในอื่นๆ	ดูแลผู้บาดเล็กน้อยได้
12/17/2020 16:35:52	อนุบาล 1	มัธยม 3		1352	โรงเรียนวัดปากบ่อ	ท่านสามารถรับดูแลผู้บาดเจ็บเล็กน้อยได้, ท่านสามารถรับดูแลผู้ป่วยที่มีอาการตกใจและให้การดูแลทางด้านจิตใจได้, ท่านสามารถช่วยดูแลเด็กได้ กรณีญาติผู้ใหญ่จำเป็นต้องให้การช่วยเหลือผู้อื่น	ใช่ อย่างแน่นอน	ท่านขาดอุปกรณ์และเครื่องมือเพื่อเพิ่มความสามารถในการช่วยเหลือ กรุณาระบุอุปกรณ์และเครื่องมือที่ต้องการในอื่นๆ	ท่านขาดทรัพยากรในองค์กรเพื่อเพิ่มความสามารถในการช่วยเหลือ กรุณาระบุทรัพยากรในองค์กรที่ต้องการในอื่นๆ	ไม่มี แต่ท่านสามารถทำได้หากมีคนมาแนะนำการฝึกปฏิบัติ กรุณาระบุสิ่งที่ท่านสามารถฝึกได้ในอื่นๆ	ทักษะในการช่วยเหลือและอุปกรณ์การแพทย์
12/11/2020 11:30:30	อนุบาล 1	ประถม 6		830	โรงเรียนวัดไผ่ตัน	ท่านสามารถรับดูแลผู้บาดเจ็บเล็กน้อยได้, ท่านสามารถรับดูแลผู้ป่วยที่มีอาการตกใจและให้การดูแลทางด้านจิตใจได้, ท่านสามารถจัดสรรที่พักสำหรับคนจรจัด หรือผู้บาดเจ็บได้, ท่านสามารถจัดสรรน้ำและอาหารให้ผู้ที่ต้องการได้, ท่านสามารถช่วยดูแลเด็กได้ กรณีญาติผู้ใหญ่จำเป็นต้องให้การช่วยเหลือผู้อื่น	ใช่ แต่ท่านต้องการการศึกษาเพิ่มเติม กรุณาระบุข้อเสนอแนะที่ต้องการศึกษาเพิ่มเติมในอื่นๆ	ท่านขาดอุปกรณ์และเครื่องมือเพื่อเพิ่มความสามารถในการช่วยเหลือ กรุณาระบุอุปกรณ์และเครื่องมือที่ต้องการในอื่นๆ	ท่านขาดทรัพยากรในองค์กรเพื่อเพิ่มความสามารถในการช่วยเหลือ กรุณาระบุทรัพยากรในองค์กรที่ต้องการในอื่นๆ	ใช่ แต่ท่านต้องการการฝึกปฏิบัติเพิ่มเติม กรุณาระบุสิ่งที่ท่านสามารถฝึกได้ในอื่นๆ	เนื่องจากเป็นโรงเรียนขนาดกลาง การฃ่วยเหลือบุคคลตามสถานการณ์นั้นอาจจะทำได้ดีที่สุดเท่าที่ปัจจัยของโรงเรียนจะเอื้ออำนวย และที่สำคัญที่สุดคืออุปกรณ์ที่ต้องใช้ช่วยฃีวิต/การรักษา อาจจะไม่เพียงพอ
12/18/2020 7:52:38	อนุบาล 1	ประถม 6		1201	โรงเรียนวัดพลมานีย์	ท่านสามารถรับดูแลผู้บาดเจ็บเล็กน้อยได้	ไม่มี แต่ท่านสามารถทำได้หากมีได้รับการศึกษาที่ตรงจุด กรุณาระบุข้อเสนอแนะที่ต้องการในอื่นๆ	ท่านขาดอุปกรณ์และเครื่องมือเพื่อเพิ่มความสามารถในการช่วยเหลือ กรุณาระบุอุปกรณ์และเครื่องมือที่ต้องการในอื่นๆ	ท่านขาดทรัพยากรในองค์กรเพื่อเพิ่มความสามารถในการช่วยเหลือ กรุณาระบุทรัพยากรในองค์กรที่ต้องการในอื่นๆ	ใช่ แต่ท่านต้องการการฝึกปฏิบัติเพิ่มเติม กรุณาระบุสิ่งที่ท่านสามารถฝึกได้ในอื่นๆ	ครูขาดทักษะในการดูแลเบื้องต้น
12/15/2020 15:56:58	อนุบาล 1	มัธยม 3		1236	โรงเรียนวัดราชโกษา	ท่านสามารถทำการห้ามเลือด ซ่อมบาดแผล การช่วยชีวิตและหัตถการฉุกเฉินอื่นๆได้, ท่านสามารถช่วยดูแลเด็กได้ กรณีญาติผู้ใหญ่จำเป็นต้องให้การช่วยเหลือผู้อื่น	ใช่ แต่ท่านต้องการการศึกษาเพิ่มเติม กรุณาระบุข้อเสนอแนะที่ต้องการศึกษาเพิ่มเติมในอื่นๆ	ท่านขาดอุปกรณ์และเครื่องมือเพื่อเพิ่มความสามารถในการช่วยเหลือ กรุณาระบุอุปกรณ์และเครื่องมือที่ต้องการในอื่นๆ	ท่านขาดทรัพยากรในองค์กรเพื่อเพิ่มความสามารถในการช่วยเหลือ กรุณาระบุทรัพยากรในองค์กรที่ต้องการในอื่นๆ	ไม่มี แต่ท่านสามารถทำได้หากมีคนมาแนะนำการฝึกปฏิบัติ กรุณาระบุสิ่งที่ท่านสามารถฝึกได้ในอื่นๆ	-
12/16/2020 13:25:10	อนุบาล 1	ประถม 6		506	โรงเรียนวัดลาดบัวขาว	ท่านสามารถทำการห้ามเลือด ซ่อมบาดแผล การช่วยชีวิตและหัตถการฉุกเฉินอื่นๆได้, ท่านสามารถช่วยดูแลเด็กได้ กรณีญาติผู้ใหญ่จำเป็นต้องให้การช่วยเหลือผู้อื่น	ไม่มี แต่ท่านสามารถทำได้หากมีได้รับการศึกษาที่ตรงจุด กรุณาระบุข้อเสนอแนะที่ต้องการในอื่นๆ	ท่านมีอุปกรณ์และเครื่องมือเพียงพอต่อการช่วยเหลือสถานการณ์พิเศษ	ท่านมีสิ่งอำนวยความสะดวกเพียงพอต่อการช่วยเหลือสถานการณ์พิเศษ	ไม่มี แต่ท่านสามารถทำได้หากมีคนมาแนะนำการฝึกปฏิบัติ กรุณาระบุสิ่งที่ท่านสามารถฝึกได้ในอื่นๆ	การช่วยเหลือเบื้องต้นสามารถดำเนินการได้ หากแต่ต้องมีเชี่ยวชาญร่วมด้วย
12/17/2020 9:12:42	อนุบาล 1	มัธยม 3		893	โรงเรียนวัดลาดพร้าว	ท่านสามารถทำการห้ามเลือด ซ่อมบาดแผล การช่วยชีวิตและหัตถการฉุกเฉินอื่นๆได้, ท่านสามารถจัดสรรน้ำและอาหารให้ผู้ที่ต้องการได้, ท่านสามารถช่วยดูแลเด็กได้ กรณีญาติผู้ใหญ่จำเป็นต้องให้การช่วยเหลือผู้อื่น	ไม่มี แต่ท่านสามารถทำได้หากมีได้รับการศึกษาที่ตรงจุด กรุณาระบุข้อเสนอแนะที่ต้องการในอื่นๆ	ท่านขาดอุปกรณ์และเครื่องมือเพื่อเพิ่มความสามารถในการช่วยเหลือ กรุณาระบุอุปกรณ์และเครื่องมือที่ต้องการในอื่นๆ, อุปกรณ์ในการปฐมพยาบาลเบื้องต้น	ท่านขาดทรัพยากรในองค์กรเพื่อเพิ่มความสามารถในการช่วยเหลือ กรุณาระบุทรัพยากรในองค์กรที่ต้องการในอื่นๆ	ใช่ แต่ท่านต้องการการฝึกปฏิบัติเพิ่มเติม กรุณาระบุสิ่งที่ท่านสามารถฝึกได้ในอื่นๆ	ควรมีการฝึกอบรมและมอบอุปกรณ์การปฐมพยาบาลเบื้องต้น
12/9/2020 7:11:01	อนุบาล 1	มัธยม 3		1622	โรงเรียนวัดเวฬุวนาราม	ท่านสามารถทำการห้ามเลือด ซ่อมบาดแผล การช่วยชีวิตและหัตถการฉุกเฉินอื่นๆได้, ท่านสามารถรับดูแลผู้บาดเจ็บเล็กน้อยได้, ท่านสามารถจัดสรรน้ำและอาหารให้ผู้ที่ต้องการได้	ใช่ แต่ท่านต้องการการศึกษาเพิ่มเติม กรุณาระบุข้อเสนอแนะที่ต้องการศึกษาเพิ่มเติมในอื่นๆ, ซีพีอาร์	ท่านขาดอุปกรณ์และเครื่องมือเพื่อเพิ่มความสามารถในการช่วยเหลือ กรุณาระบุอุปกรณ์และเครื่องมือที่ต้องการในอื่นๆ	ท่านขาดทรัพยากรในองค์กรเพื่อเพิ่มความสามารถในการช่วยเหลือ กรุณาระบุทรัพยากรในองค์กรที่ต้องการในอื่นๆ	ใช่ อย่างแน่นอน	การอบรมแบบปฏิบัติจริงในเรื่องปั๊มหัวใจ
12/16/2020 14:22:58	อนุบาล 1	มัธยม 3		1364	โรงเรียนวัดศรีนวลธรรมวิมล	ท่านสามารถรับดูแลผู้บาดเจ็บเล็กน้อยได้	ใช่ แต่ท่านต้องการการศึกษาเพิ่มเติม กรุณาระบุข้อเสนอแนะที่ต้องการศึกษาเพิ่มเติมในอื่นๆ	ท่านมีอุปกรณ์และเครื่องมือเพียงพอต่อการช่วยเหลือสถานการณ์พิเศษ	ท่านขาดทรัพยากรในองค์กรเพื่อเพิ่มความสามารถในการช่วยเหลือ กรุณาระบุทรัพยากรในองค์กรที่ต้องการในอื่นๆ	ใช่ อย่างแน่นอน	ดีมากค่ะ
12/16/2020 9:20:18	อนุบาล 1	ประถม 6		647	โรงเรียนวัดสุวรรณ	ท่านสามารถรับดูแลผู้บาดเจ็บเล็กน้อยได้, ท่านสามารถรับดูแลผู้ป่วยที่มีอาการตกใจและให้การดูแลทางด้านจิตใจได้, ท่านสามารถจัดสรรน้ำและอาหารให้ผู้ที่ต้องการได้, ท่านสามารถช่วยดูแลเด็กได้ กรณีญาติผู้ใหญ่จำเป็นต้องให้การช่วยเหลือผู้อื่น	ไม่มี แต่ท่านสามารถทำได้หากมีได้รับการศึกษาที่ตรงจุด กรุณาระบุข้อเสนอแนะที่ต้องการในอื่นๆ	ท่านขาดอุปกรณ์และเครื่องมือเพื่อเพิ่มความสามารถในการช่วยเหลือ กรุณาระบุอุปกรณ์และเครื่องมือที่ต้องการในอื่นๆ	ท่านขาดทรัพยากรในองค์กรเพื่อเพิ่มความสามารถในการช่วยเหลือ กรุณาระบุทรัพยากรในองค์กรที่ต้องการในอื่นๆ	ใช่ อย่างแน่นอน	-
12/16/2020 13:02:16	อนุบาล 1	ประถม 6		2029	โรงเรียนศรีเอี่ยมอนุสรณ์	ท่านสามารถรับดูแลผู้บาดเจ็บเล็กน้อยได้	ใช่ แต่ท่านต้องการการศึกษาเพิ่มเติม กรุณาระบุข้อเสนอแนะที่ต้องการศึกษาเพิ่มเติมในอื่นๆ	ท่านขาดอุปกรณ์และเครื่องมือเพื่อเพิ่มความสามารถในการช่วยเหลือ กรุณาระบุอุปกรณ์และเครื่องมือที่ต้องการในอื่นๆ	ท่านขาดทรัพยากรในองค์กรเพื่อเพิ่มความสามารถในการช่วยเหลือ กรุณาระบุทรัพยากรในองค์กรที่ต้องการในอื่นๆ	ใช่ แต่ท่านต้องการการฝึกปฏิบัติเพิ่มเติม กรุณาระบุสิ่งที่ท่านสามารถฝึกได้ในอื่นๆ	การรักษาพยาบาลเบื้องต้น
12/7/2020 13:56:39	อนุบาล 1	ประถม 6		812	โรงเรียนศูนย์รวมน้ำใจ	ท่านสามารถทำการห้ามเลือด ซ่อมบาดแผล การช่วยชีวิตและหัตถการฉุกเฉินอื่นๆได้, ท่านสามารถจัดสรรน้ำและอาหารให้ผู้ที่ต้องการได้	ไม่มี แต่ท่านสามารถทำได้หากมีได้รับการศึกษาที่ตรงจุด กรุณาระบุข้อเสนอแนะที่ต้องการในอื่นๆ	ท่านขาดอุปกรณ์และเครื่องมือเพื่อเพิ่มความสามารถในการช่วยเหลือ กรุณาระบุอุปกรณ์และเครื่องมือที่ต้องการในอื่นๆ	ท่านขาดทรัพยากรในองค์กรเพื่อเพิ่มความสามารถในการช่วยเหลือ กรุณาระบุทรัพยากรในองค์กรที่ต้องการในอื่นๆ	ไม่มี แต่ท่านสามารถทำได้หากมีคนมาแนะนำการฝึกปฏิบัติ กรุณาระบุสิ่งที่ท่านสามารถฝึกได้ในอื่นๆ	-
12/17/2020 14:11:54	อนุบาล 1	มัธยม 3		3130	โรงเรียนสามเสนนอก (ประชาราษฎร์อนุกูล)	ท่านสามารถรับดูแลผู้บาดเจ็บเล็กน้อยได้, ท่านสามารถจัดสรรน้ำและอาหารให้ผู้ที่ต้องการได้, ท่านสามารถช่วยดูแลเด็กได้ กรณีญาติผู้ใหญ่จำเป็นต้องให้การช่วยเหลือผู้อื่น	ใช่ แต่ท่านต้องการการศึกษาเพิ่มเติม กรุณาระบุข้อเสนอแนะที่ต้องการศึกษาเพิ่มเติมในอื่นๆ, การปั๊มหัวใจ การห้ามเลือด	ท่านมีอุปกรณ์และเครื่องมือเพียงพอต่อการช่วยเหลือสถานการณ์พิเศษ	ท่านมีสิ่งอำนวยความสะดวกเพียงพอต่อการช่วยเหลือสถานการณ์พิเศษ	ใช่ อย่างแน่นอน	ต้องการรับการสนับสนุนอุปกรณ์ปฐมพยาบาล
12/17/2020 15:16:56	อนุบาล 1	มัธยม 3		2106	โรงเรียนสายไหม(ทัสนารมย์อนุสรณ์)	ท่านสามารถรับดูแลผู้บาดเจ็บเล็กน้อยได้	ไม่มี แต่ท่านสามารถทำได้หากมีได้รับการศึกษาที่ตรงจุด กรุณาระบุข้อเสนอแนะที่ต้องการในอื่นๆ	ท่านขาดอุปกรณ์และเครื่องมือเพื่อเพิ่มความสามารถในการช่วยเหลือ กรุณาระบุอุปกรณ์และเครื่องมือที่ต้องการในอื่นๆ, อุปกรณ์สำหรับการเคลื่อนย้ายผู้ป่วย	ท่านขาดทรัพยากรในองค์กรเพื่อเพิ่มความสามารถในการช่วยเหลือ กรุณาระบุทรัพยากรในองค์กรที่ต้องการในอื่นๆ	ไม่มี แต่ท่านสามารถทำได้หากมีคนมาแนะนำการฝึกปฏิบัติ กรุณาระบุสิ่งที่ท่านสามารถฝึกได้ในอื่นๆ	เคยฝึกปฎิบัตรการเคลื่อนย้ายผู้ป่วย การปฐมพยาบาลเบื้องต้นและการช่วยเหลือผู้ป่วยโดยการทำ CPR
12/16/2020 13:31:30	อนุบาล 1	มัธยม 3		813	โรงเรียนสุเหร่าแสนแสบ	ท่านสามารถรับดูแลผู้บาดเจ็บเล็กน้อยได้	ไม่มี แต่ท่านสามารถทำได้หากมีได้รับการศึกษาที่ตรงจุด กรุณาระบุข้อเสนอแนะที่ต้องการในอื่นๆ	ท่านขาดอุปกรณ์และเครื่องมือเพื่อเพิ่มความสามารถในการช่วยเหลือ กรุณาระบุอุปกรณ์และเครื่องมือที่ต้องการในอื่นๆ	ท่านขาดทรัพยากรในองค์กรเพื่อเพิ่มความสามารถในการช่วยเหลือ กรุณาระบุทรัพยากรในองค์กรที่ต้องการในอื่นๆ	ไม่มี แต่ท่านสามารถทำได้หากมีคนมาแนะนำการฝึกปฏิบัติ กรุณาระบุสิ่งที่ท่านสามารถฝึกได้ในอื่นๆ	ไม่มี
12/17/2020 10:39:16	อนุบาล 1	ประถม 6		918	ลำพะอง(ราษฎร์จำเริญบำรุง)	ท่านสามารถจัดสรรน้ำและอาหารให้ผู้ที่ต้องการได้	ไม่มี แต่ท่านสามารถทำได้หากมีได้รับการศึกษาที่ตรงจุด กรุณาระบุข้อเสนอแนะที่ต้องการในอื่นๆ, การอบรม	ท่านขาดอุปกรณ์และเครื่องมือเพื่อเพิ่มความสามารถในการช่วยเหลือ กรุณาระบุอุปกรณ์และเครื่องมือที่ต้องการในอื่นๆ	ท่านขาดทรัพยากรในองค์กรเพื่อเพิ่มความสามารถในการช่วยเหลือ กรุณาระบุทรัพยากรในองค์กรที่ต้องการในอื่นๆ	ใช่ แต่ท่านต้องการการฝึกปฏิบัติเพิ่มเติม กรุณาระบุสิ่งที่ท่านสามารถฝึกได้ในอื่นๆ	ควรมีการจัดอบรมให้ความรู้
12/8/2020 10:26:33	อนุบาล 1	ประถม 6		531	ลำสาลี (ราษฎร์บำรุงฉ	ท่านสามารถจัดสรรน้ำและอาหารให้ผู้ที่ต้องการได้, ท่านสามารถช่วยดูแลเด็กได้ กรณีญาติผู้ใหญ่จำเป็นต้องให้การช่วยเหลือผู้อื่น	ไม่มี แต่ท่านสามารถทำได้หากมีได้รับการศึกษาที่ตรงจุด กรุณาระบุข้อเสนอแนะที่ต้องการในอื่นๆ	ท่านขาดอุปกรณ์และเครื่องมือเพื่อเพิ่มความสามารถในการช่วยเหลือ กรุณาระบุอุปกรณ์และเครื่องมือที่ต้องการในอื่นๆ	ท่านขาดทรัพยากรในองค์กรเพื่อเพิ่มความสามารถในการช่วยเหลือ กรุณาระบุทรัพยากรในองค์กรที่ต้องการในอื่นๆ	ไม่มี แต่ท่านสามารถทำได้หากมีคนมาแนะนำการฝึกปฏิบัติ กรุณาระบุสิ่งที่ท่านสามารถฝึกได้ในอื่นๆ	การดูแลผู้บาดเจ็บต้องเป็นผู้มีทักษะในการที่จะสามารถช่วยเหลือได้อย่างถูกต้อง มิเช่นนั้น ปู้บาดเจ็บอาจจะมีการบาดเจ็บมากขึ้น
12/14/2020 13:32:30	อนุบาล 1	ประถม 6		671	วัดกระจับพินิจ	ท่านสามารถรับดูแลผู้บาดเจ็บเล็กน้อยได้, ท่านสามารถรับดูแลผู้ป่วยที่มีอาการตกใจและให้การดูแลทางด้านจิตใจได้, ท่านสามารถจัดสรรน้ำและอาหารให้ผู้ที่ต้องการได้, ท่านสามารถช่วยดูแลเด็กได้ กรณีญาติผู้ใหญ่จำเป็นต้องให้การช่วยเหลือผู้อื่น, ท่านสามารถส่งเจ้าหน้าที่ไปช่วยเหลือองค์กรอื่นได้	ไม่มี แต่ท่านสามารถทำได้หากมีได้รับการศึกษาที่ตรงจุด กรุณาระบุข้อเสนอแนะที่ต้องการในอื่นๆ	ท่านขาดอุปกรณ์และเครื่องมือเพื่อเพิ่มความสามารถในการช่วยเหลือ กรุณาระบุอุปกรณ์และเครื่องมือที่ต้องการในอื่นๆ	ท่านขาดทรัพยากรในองค์กรเพื่อเพิ่มความสามารถในการช่วยเหลือ กรุณาระบุทรัพยากรในองค์กรที่ต้องการในอื่นๆ	ใช่ แต่ท่านต้องการการฝึกปฏิบัติเพิ่มเติม กรุณาระบุสิ่งที่ท่านสามารถฝึกได้ในอื่นๆ	ทางโรงเรียนมีทรัพยากรบุคคลเพียงอย่างเดียวในการช่วยเหลือ และทักษะในการช่วยเหลือของแต่ละบุคคลมีไม่เท่ากันต้องได้รับคำแนะนำเพิ่มเติม สำหรับการปฏิบัติช่วยเหลือ
12/18/2020 7:33:25	อนุบาล 1	มัธยม 3		905	วัดกำแพง	ท่านสามารถช่วยดูแลเด็กได้ กรณีญาติผู้ใหญ่จำเป็นต้องให้การช่วยเหลือผู้อื่น	ไม่มี แต่ท่านสามารถทำได้หากมีได้รับการศึกษาที่ตรงจุด กรุณาระบุข้อเสนอแนะที่ต้องการในอื่นๆ, การทำ cpr	ท่านขาดอุปกรณ์และเครื่องมือเพื่อเพิ่มความสามารถในการช่วยเหลือ กรุณาระบุอุปกรณ์และเครื่องมือที่ต้องการในอื่นๆ	ท่านขาดทรัพยากรในองค์กรเพื่อเพิ่มความสามารถในการช่วยเหลือ กรุณาระบุทรัพยากรในองค์กรที่ต้องการในอื่นๆ	ไม่มี แต่ท่านสามารถทำได้หากมีคนมาแนะนำการฝึกปฏิบัติ กรุณาระบุสิ่งที่ท่านสามารถฝึกได้ในอื่นๆ	ถ้ามีการอบรมฝึกปฏิบัติน่าจะมีประโยชน์์์์์ในกรณีย์ที่เกิดเหตุ
12/15/2020 15:56:31	อนุบาล 1	ประถม 6		660	วัดไทร	ท่านสามารถรับดูแลผู้บาดเจ็บเล็กน้อยได้, ท่านสามารถจัดสรรที่พักสำหรับคนจรจัด หรือผู้บาดเจ็บได้, ท่านสามารถจัดสรรน้ำและอาหารให้ผู้ที่ต้องการได้, ท่านสามารถช่วยดูแลเด็กได้ กรณีญาติผู้ใหญ่จำเป็นต้องให้การช่วยเหลือผู้อื่น, หน่วยงานของท่านไม่สามารถให้ความช่วยเหลือได้	ใช่ แต่ท่านต้องการการศึกษาเพิ่มเติม กรุณาระบุข้อเสนอแนะที่ต้องการศึกษาเพิ่มเติมในอื่นๆ	เครื่องวัดความดัน	ท่านขาดทรัพยากรในองค์กรเพื่อเพิ่มความสามารถในการช่วยเหลือ กรุณาระบุทรัพยากรในองค์กรที่ต้องการในอื่นๆ, บุคลากร ที่มีความเชี่ยวชาญ	ไม่มี แต่ท่านสามารถทำได้หากมีคนมาแนะนำการฝึกปฏิบัติ กรุณาระบุสิ่งที่ท่านสามารถฝึกได้ในอื่นๆ, การปฐมพยาบาลเบื้องต้น	การช่เหลือจานก รพ.ในชุมย
12/7/2020 16:46:05	อนุบาล 1	ประถม 6		506	วัดบางพลัด	ท่านสามารถรับดูแลผู้บาดเจ็บเล็กน้อยได้, ท่านสามารถรับดูแลผู้ป่วยที่มีอาการตกใจและให้การดูแลทางด้านจิตใจได้, ท่านสามารถช่วยดูแลเด็กได้ กรณีญาติผู้ใหญ่จำเป็นต้องให้การช่วยเหลือผู้อื่น	ไม่มี แต่ท่านสามารถทำได้หากมีได้รับการศึกษาที่ตรงจุด กรุณาระบุข้อเสนอแนะที่ต้องการในอื่นๆ, การปั๊มหัวใจ..ทำแผล	ประเมินสถาการณ์ยาก..ว่าต้องมีอะไรพร้อม	ไม่แน่ใจ..มีอุปกรณ์ปฐมพยาบาลเบื้องต้นจำนวนเล็กน้อย	ไม่มี แต่ท่านสามารถทำได้หากมีคนมาแนะนำการฝึกปฏิบัติ กรุณาระบุสิ่งที่ท่านสามารถฝึกได้ในอื่นๆ	ครูมีความตั้งใจช่วยเหลือสังคม..แต่ไม่มีความรู้และทักษะเพียงพอ. บางสถานการณ์อาจทำในสิ่งที่ไม่ถูกต้องได้..อาจทำให้ผู้บาดเจ็บอันตรายมากกว่าเดิม
12/16/2020 16:34:36	อนุบาล 1	ประถม 6		815	วัดบำเพ็ญเหนือ	ท่านสามารถทำการห้ามเลือด ซ่อมบาดแผล การช่วยชีวิตและหัตถการฉุกเฉินอื่นๆได้, ท่านสามารถรับดูแลผู้บาดเจ็บเล็กน้อยได้, ท่านสามารถรับดูแลผู้ป่วยที่มีอาการตกใจและให้การดูแลทางด้านจิตใจได้	ใช่ แต่ท่านต้องการการศึกษาเพิ่มเติม กรุณาระบุข้อเสนอแนะที่ต้องการศึกษาเพิ่มเติมในอื่นๆ	ท่านขาดอุปกรณ์และเครื่องมือเพื่อเพิ่มความสามารถในการช่วยเหลือ กรุณาระบุอุปกรณ์และเครื่องมือที่ต้องการในอื่นๆ	ท่านขาดทรัพยากรในองค์กรเพื่อเพิ่มความสามารถในการช่วยเหลือ กรุณาระบุทรัพยากรในองค์กรที่ต้องการในอื่นๆ	ใช่ แต่ท่านต้องการการฝึกปฏิบัติเพิ่มเติม กรุณาระบุสิ่งที่ท่านสามารถฝึกได้ในอื่นๆ	การให้ความช่วยเหลือช่วงวิกฤษผู้ให้การช่วยเหลือควรมีทักษะการช่วยเหลือ
12/8/2020 11:57:28	อนุบาล 1	ประถม 6		830	วัดไผ่เงินโชตนาราม	ท่านสามารถทำการห้ามเลือด ซ่อมบาดแผล การช่วยชีวิตและหัตถการฉุกเฉินอื่นๆได้, ท่านสามารถรับดูแลผู้บาดเจ็บเล็กน้อยได้, ท่านสามารถรับดูแลผู้ป่วยที่มีอาการตกใจและให้การดูแลทางด้านจิตใจได้, ท่านสามารถช่วยดูแลเด็กได้ กรณีญาติผู้ใหญ่จำเป็นต้องให้การช่วยเหลือผู้อื่น	ไม่มี แต่ท่านสามารถทำได้หากมีได้รับการศึกษาที่ตรงจุด กรุณาระบุข้อเสนอแนะที่ต้องการในอื่นๆ	ท่านขาดอุปกรณ์และเครื่องมือเพื่อเพิ่มความสามารถในการช่วยเหลือ กรุณาระบุอุปกรณ์และเครื่องมือที่ต้องการในอื่นๆ	ท่านมีสิ่งอำนวยความสะดวกเพียงพอต่อการช่วยเหลือสถานการณ์พิเศษ, ท่านขาดทรัพยากรในองค์กรเพื่อเพิ่มความสามารถในการช่วยเหลือ กรุณาระบุทรัพยากรในองค์กรที่ต้องการในอื่นๆ	ใช่ แต่ท่านต้องการการฝึกปฏิบัติเพิ่มเติม กรุณาระบุสิ่งที่ท่านสามารถฝึกได้ในอื่นๆ	จัดอบรมให้ความรู้กับครูและบุคลากรในโรงเรียน เพื่อให้มีทักษะในการช่วยเหลือและดูแลผู้ที่ได้รับบาดเจ็บ
12/17/2020 17:20:55	อนุบาล 1	มัธยม 3		730	วัดพระยาปลา	ท่านสามารถรับดูแลผู้บาดเจ็บเล็กน้อยได้, ท่านสามารถจัดสรรน้ำและอาหารให้ผู้ที่ต้องการได้, ท่านสามารถช่วยดูแลเด็กได้ กรณีญาติผู้ใหญ่จำเป็นต้องให้การช่วยเหลือผู้อื่น	ใช่ แต่ท่านต้องการการศึกษาเพิ่มเติม กรุณาระบุข้อเสนอแนะที่ต้องการศึกษาเพิ่มเติมในอื่นๆ	ท่านขาดอุปกรณ์และเครื่องมือเพื่อเพิ่มความสามารถในการช่วยเหลือ กรุณาระบุอุปกรณ์และเครื่องมือที่ต้องการในอื่นๆ	ท่านขาดทรัพยากรในองค์กรเพื่อเพิ่มความสามารถในการช่วยเหลือ กรุณาระบุทรัพยากรในองค์กรที่ต้องการในอื่นๆ	ใช่ แต่ท่านต้องการการฝึกปฏิบัติเพิ่มเติม กรุณาระบุสิ่งที่ท่านสามารถฝึกได้ในอื่นๆ	ขอหลักสูตรทักษะการปฐมพยาบาลเบื้ิองต้นและการดูแลผู้สูงวัยสำหรับครูและนักเรียนระดับชั้นมัธยมศึกษา
12/17/2020 7:06:26	อนุบาล 1	มัธยม 3		936	วัดพระยาสุเรนทร์	ท่านสามารถรับดูแลผู้บาดเจ็บเล็กน้อยได้, ท่านสามารถช่วยดูแลเด็กได้ กรณีญาติผู้ใหญ่จำเป็นต้องให้การช่วยเหลือผู้อื่น	ไม่มี แต่ท่านสามารถทำได้หากมีได้รับการศึกษาที่ตรงจุด กรุณาระบุข้อเสนอแนะที่ต้องการในอื่นๆ	ท่านขาดอุปกรณ์และเครื่องมือเพื่อเพิ่มความสามารถในการช่วยเหลือ กรุณาระบุอุปกรณ์และเครื่องมือที่ต้องการในอื่นๆ	ท่านขาดทรัพยากรในองค์กรเพื่อเพิ่มความสามารถในการช่วยเหลือ กรุณาระบุทรัพยากรในองค์กรที่ต้องการในอื่นๆ	ใช่ แต่ท่านต้องการการฝึกปฏิบัติเพิ่มเติม กรุณาระบุสิ่งที่ท่านสามารถฝึกได้ในอื่นๆ	อยากมีความรู้พื้นฐานในการช่วยเหลือ
12/8/2020 17:02:39	อนุบาล 1	ประถม 6		544	วัดยางสูทธาราม	ท่านสามารถทำการห้ามเลือด ซ่อมบาดแผล การช่วยชีวิตและหัตถการฉุกเฉินอื่นๆได้	ไม่มี แต่ท่านสามารถทำได้หากมีได้รับการศึกษาที่ตรงจุด กรุณาระบุข้อเสนอแนะที่ต้องการในอื่นๆ	ท่านขาดอุปกรณ์และเครื่องมือเพื่อเพิ่มความสามารถในการช่วยเหลือ กรุณาระบุอุปกรณ์และเครื่องมือที่ต้องการในอื่นๆ	ท่านมีสิ่งอำนวยความสะดวกเพียงพอต่อการช่วยเหลือสถานการณ์พิเศษ	ใช่ แต่ท่านต้องการการฝึกปฏิบัติเพิ่มเติม กรุณาระบุสิ่งที่ท่านสามารถฝึกได้ในอื่นๆ	เป็นการปฐมพยาบาลที่ดี
12/17/2020 16:31:17	อนุบาล 1	มัธยม 3		1006	วัดราชสิงขร	ท่านสามารถทำการห้ามเลือด ซ่อมบาดแผล การช่วยชีวิตและหัตถการฉุกเฉินอื่นๆได้, ท่านสามารถรับดูแลผู้บาดเจ็บเล็กน้อยได้, ท่านสามารถรับดูแลผู้ป่วยที่มีอาการตกใจและให้การดูแลทางด้านจิตใจได้, ท่านสามารถจัดสรรน้ำและอาหารให้ผู้ที่ต้องการได้, ท่านสามารถช่วยดูแลเด็กได้ กรณีญาติผู้ใหญ่จำเป็นต้องให้การช่วยเหลือผู้อื่น	ใช่ แต่ท่านต้องการการศึกษาเพิ่มเติม กรุณาระบุข้อเสนอแนะที่ต้องการศึกษาเพิ่มเติมในอื่นๆ	ท่านขาดอุปกรณ์และเครื่องมือเพื่อเพิ่มความสามารถในการช่วยเหลือ กรุณาระบุอุปกรณ์และเครื่องมือที่ต้องการในอื่นๆ	ท่านขาดทรัพยากรในองค์กรเพื่อเพิ่มความสามารถในการช่วยเหลือ กรุณาระบุทรัพยากรในองค์กรที่ต้องการในอื่นๆ	ใช่ แต่ท่านต้องการการฝึกปฏิบัติเพิ่มเติม กรุณาระบุสิ่งที่ท่านสามารถฝึกได้ในอื่นๆ	การดูแลก่อนถึงมือแพทย์ เครื่องมือทางการแพทย์เบื้องต้น
12/16/2020 7:14:28	อนุบาล 1	ประถม 6		506	วัดลาดบัวขาว	ท่านสามารถรับดูแลผู้บาดเจ็บเล็กน้อยได้	ใช่ แต่ท่านต้องการการศึกษาเพิ่มเติม กรุณาระบุข้อเสนอแนะที่ต้องการศึกษาเพิ่มเติมในอื่นๆ	ท่านขาดอุปกรณ์และเครื่องมือเพื่อเพิ่มความสามารถในการช่วยเหลือ กรุณาระบุอุปกรณ์และเครื่องมือที่ต้องการในอื่นๆ, อุปกรณ์ทำแผล	ท่านขาดทรัพยากรในองค์กรเพื่อเพิ่มความสามารถในการช่วยเหลือ กรุณาระบุทรัพยากรในองค์กรที่ต้องการในอื่นๆ	ไม่มี แต่ท่านสามารถทำได้หากมีคนมาแนะนำการฝึกปฏิบัติ กรุณาระบุสิ่งที่ท่านสามารถฝึกได้ในอื่นๆ, การปฐมพยาบาลเบื้องต้น	ขอบคุณค่ะ
12/8/2020 14:42:29	อนุบาล 1	ประถม 6		958	วัด​ลาด​ปลา​เค้า	ท่านสามารถรับดูแลผู้บาดเจ็บเล็กน้อยได้	ไม่มี แต่ท่านสามารถทำได้หากมีได้รับการศึกษาที่ตรงจุด กรุณาระบุข้อเสนอแนะที่ต้องการในอื่นๆ	ท่านขาดอุปกรณ์และเครื่องมือเพื่อเพิ่มความสามารถในการช่วยเหลือ กรุณาระบุอุปกรณ์และเครื่องมือที่ต้องการในอื่นๆ	ท่านขาดทรัพยากรในองค์กรเพื่อเพิ่มความสามารถในการช่วยเหลือ กรุณาระบุทรัพยากรในองค์กรที่ต้องการในอื่นๆ	ใช่ แต่ท่านต้องการการฝึกปฏิบัติเพิ่มเติม กรุณาระบุสิ่งที่ท่านสามารถฝึกได้ในอื่นๆ	ในการให้ความช่วยเหลือ​ต้องมีความชำนาญ​และมีประสบการณ์​ค่อนข้าง​มาก เพราะ​ต้องยึดหลักความปลอดภัย​เป็น​อันดับ​แรก
12/14/2020 13:57:57	อนุบาล 1	ประถม 6		724	วัดศรีบุญเรือง	ท่านสามารถรับดูแลผู้บาดเจ็บเล็กน้อยได้, ท่านสามารถรับดูแลผู้ป่วยที่มีอาการตกใจและให้การดูแลทางด้านจิตใจได้	ไม่มี แต่ท่านสามารถทำได้หากมีได้รับการศึกษาที่ตรงจุด กรุณาระบุข้อเสนอแนะที่ต้องการในอื่นๆ	ท่านขาดอุปกรณ์และเครื่องมือเพื่อเพิ่มความสามารถในการช่วยเหลือ กรุณาระบุอุปกรณ์และเครื่องมือที่ต้องการในอื่นๆ	ท่านขาดทรัพยากรในองค์กรเพื่อเพิ่มความสามารถในการช่วยเหลือ กรุณาระบุทรัพยากรในองค์กรที่ต้องการในอื่นๆ	ไม่มี แต่ท่านสามารถทำได้หากมีคนมาแนะนำการฝึกปฏิบัติ กรุณาระบุสิ่งที่ท่านสามารถฝึกได้ในอื่นๆ	-
12/17/2020 10:23:08	อนุบาล 1	ประถม 6		732	วัดศาลาแดง	ท่านสามารถรับดูแลผู้บาดเจ็บเล็กน้อยได้, ท่านสามารถช่วยดูแลเด็กได้ กรณีญาติผู้ใหญ่จำเป็นต้องให้การช่วยเหลือผู้อื่น	ไม่มี แต่ท่านสามารถทำได้หากมีได้รับการศึกษาที่ตรงจุด กรุณาระบุข้อเสนอแนะที่ต้องการในอื่นๆ, อบรมบุคลากรเกี่ยวกับทักษะการช่วยเหลือ	ท่านขาดอุปกรณ์และเครื่องมือเพื่อเพิ่มความสามารถในการช่วยเหลือ กรุณาระบุอุปกรณ์และเครื่องมือที่ต้องการในอื่นๆ, เครื่องวัดความดัน ,เทอร์มิเตอร์วัดไข้,เครื่องเลเซอร์วัดไข้	ท่านขาดทรัพยากรในองค์กรเพื่อเพิ่มความสามารถในการช่วยเหลือ กรุณาระบุทรัพยากรในองค์กรที่ต้องการในอื่นๆ, เตียงพยาบาลไม่เพียงพอ,วัสดุอุปกรณ์ในการปฐมพยาบาลเบื้องต้น	ใช่ แต่ท่านต้องการการฝึกปฏิบัติเพิ่มเติม กรุณาระบุสิ่งที่ท่านสามารถฝึกได้ในอื่นๆ, การปฐมพยาบาล,การช่วยเหลือนักเรีบนภาวะฉุกเฉินหรือมีความเสี่ยง	ครูและบุคลากรยังขาดความรู้และทักษะ การช่วยเหลือและดูแลนักเรีบน ถ้าสามารถฝึกอบรมให้บุคลากร มีความรู้และทักษะการช่วยเหลือทุกคนจะเป็นประโยชน์กับนักเรียนมาก
12/15/2020 15:14:36	อนุบาล 1	มัธยม 3		824	วัดสามง่าม	ท่านสามารถทำการห้ามเลือด ซ่อมบาดแผล การช่วยชีวิตและหัตถการฉุกเฉินอื่นๆได้, ท่านสามารถรับดูแลผู้บาดเจ็บเล็กน้อยได้, ท่านสามารถรับดูแลผู้ป่วยที่มีอาการตกใจและให้การดูแลทางด้านจิตใจได้, ท่านสามารถส่งเจ้าหน้าที่ไปช่วยเหลือองค์กรอื่นได้	ไม่มี แต่ท่านสามารถทำได้หากมีได้รับการศึกษาที่ตรงจุด กรุณาระบุข้อเสนอแนะที่ต้องการในอื่นๆ	ท่านมีอุปกรณ์และเครื่องมือเพียงพอต่อการช่วยเหลือสถานการณ์พิเศษ	ท่านมีสิ่งอำนวยความสะดวกเพียงพอต่อการช่วยเหลือสถานการณ์พิเศษ	ใช่ แต่ท่านต้องการการฝึกปฏิบัติเพิ่มเติม กรุณาระบุสิ่งที่ท่านสามารถฝึกได้ในอื่นๆ	ไม่มี
12/16/2020 8:17:34	อนุบาล 1	ประถม 6		712	วัดเสมียนนารี	ท่านสามารถทำการห้ามเลือด ซ่อมบาดแผล การช่วยชีวิตและหัตถการฉุกเฉินอื่นๆได้, ท่านสามารถรับดูแลผู้บาดเจ็บเล็กน้อยได้, ท่านสามารถจัดสรรน้ำและอาหารให้ผู้ที่ต้องการได้, ท่านสามารถช่วยดูแลเด็กได้ กรณีญาติผู้ใหญ่จำเป็นต้องให้การช่วยเหลือผู้อื่น	ไม่มี แต่ท่านสามารถทำได้หากมีได้รับการศึกษาที่ตรงจุด กรุณาระบุข้อเสนอแนะที่ต้องการในอื่นๆ	ท่านขาดอุปกรณ์และเครื่องมือเพื่อเพิ่มความสามารถในการช่วยเหลือ กรุณาระบุอุปกรณ์และเครื่องมือที่ต้องการในอื่นๆ	ท่านขาดทรัพยากรในองค์กรเพื่อเพิ่มความสามารถในการช่วยเหลือ กรุณาระบุทรัพยากรในองค์กรที่ต้องการในอื่นๆ	ไม่มี แต่ท่านสามารถทำได้หากมีคนมาแนะนำการฝึกปฏิบัติ กรุณาระบุสิ่งที่ท่านสามารถฝึกได้ในอื่นๆ	ไม่มี
12/22/2020 10:53:09	อนุบาล 1	มัธยม 3		1521	วัดหนองใหญ่	ท่านสามารถรับดูแลผู้บาดเจ็บเล็กน้อยได้	ไม่มี แต่ท่านสามารถทำได้หากมีได้รับการศึกษาที่ตรงจุด กรุณาระบุข้อเสนอแนะที่ต้องการในอื่นๆ	ท่านขาดอุปกรณ์และเครื่องมือเพื่อเพิ่มความสามารถในการช่วยเหลือ กรุณาระบุอุปกรณ์และเครื่องมือที่ต้องการในอื่นๆ	ท่านขาดทรัพยากรในองค์กรเพื่อเพิ่มความสามารถในการช่วยเหลือ กรุณาระบุทรัพยากรในองค์กรที่ต้องการในอื่นๆ	ไม่มี แต่ท่านสามารถทำได้หากมีคนมาแนะนำการฝึกปฏิบัติ กรุณาระบุสิ่งที่ท่านสามารถฝึกได้ในอื่นๆ	ควรมีการฝึกอบรมให้ความรู้
12/14/2020 13:44:30	อนุบาล 1	มัธยม 3		510	วิจิตรวิทยา	ท่านสามารถทำการห้ามเลือด ซ่อมบาดแผล การช่วยชีวิตและหัตถการฉุกเฉินอื่นๆได้, ท่านสามารถรับดูแลผู้บาดเจ็บเล็กน้อยได้, ท่านสามารถจัดสรรน้ำและอาหารให้ผู้ที่ต้องการได้	ใช่ แต่ท่านต้องการการศึกษาเพิ่มเติม กรุณาระบุข้อเสนอแนะที่ต้องการศึกษาเพิ่มเติมในอื่นๆ	ท่านขาดอุปกรณ์และเครื่องมือเพื่อเพิ่มความสามารถในการช่วยเหลือ กรุณาระบุอุปกรณ์และเครื่องมือที่ต้องการในอื่นๆ	ท่านขาดทรัพยากรในองค์กรเพื่อเพิ่มความสามารถในการช่วยเหลือ กรุณาระบุทรัพยากรในองค์กรที่ต้องการในอื่นๆ	ไม่มี แต่ท่านสามารถทำได้หากมีคนมาแนะนำการฝึกปฏิบัติ กรุณาระบุสิ่งที่ท่านสามารถฝึกได้ในอื่นๆ	-
12/9/2020 17:16:50	อนุบาล 1	ประถม 6		526	สวนลุมพินี	ท่านสามารถทำการห้ามเลือด ซ่อมบาดแผล การช่วยชีวิตและหัตถการฉุกเฉินอื่นๆได้, ท่านสามารถรับดูแลผู้บาดเจ็บเล็กน้อยได้, ท่านสามารถรับดูแลผู้ป่วยที่มีอาการตกใจและให้การดูแลทางด้านจิตใจได้, ท่านสามารถจัดสรรน้ำและอาหารให้ผู้ที่ต้องการได้, ท่านสามารถช่วยดูแลเด็กได้ กรณีญาติผู้ใหญ่จำเป็นต้องให้การช่วยเหลือผู้อื่น	ไม่มี แต่ท่านสามารถทำได้หากมีได้รับการศึกษาที่ตรงจุด กรุณาระบุข้อเสนอแนะที่ต้องการในอื่นๆ	ท่านขาดอุปกรณ์และเครื่องมือเพื่อเพิ่มความสามารถในการช่วยเหลือ กรุณาระบุอุปกรณ์และเครื่องมือที่ต้องการในอื่นๆ	ท่านมีสิ่งอำนวยความสะดวกเพียงพอต่อการช่วยเหลือสถานการณ์พิเศษ	ใช่ แต่ท่านต้องการการฝึกปฏิบัติเพิ่มเติม กรุณาระบุสิ่งที่ท่านสามารถฝึกได้ในอื่นๆ	ไม่มี
12/21/2020 9:43:54	อนุบาล 1	มัธยม 3		1643	สุเหร่าทรายกองดิน	ท่านสามารถรับดูแลผู้บาดเจ็บเล็กน้อยได้	ใช่ แต่ท่านต้องการการศึกษาเพิ่มเติม กรุณาระบุข้อเสนอแนะที่ต้องการศึกษาเพิ่มเติมในอื่นๆ	ท่านขาดอุปกรณ์และเครื่องมือเพื่อเพิ่มความสามารถในการช่วยเหลือ กรุณาระบุอุปกรณ์และเครื่องมือที่ต้องการในอื่นๆ	ท่านขาดทรัพยากรในองค์กรเพื่อเพิ่มความสามารถในการช่วยเหลือ กรุณาระบุทรัพยากรในองค์กรที่ต้องการในอื่นๆ	ใช่ แต่ท่านต้องการการฝึกปฏิบัติเพิ่มเติม กรุณาระบุสิ่งที่ท่านสามารถฝึกได้ในอื่นๆ	อยากได้รับการสนับสนุนด้านอุปกรณ์การช่วยเหลือด้านต่างๆ
12/15/2020 13:58:37	อนุบาล 1	มัธยม 3		520	สุเหร่าใหม่	ท่านสามารถจัดสรรที่พักสำหรับคนจรจัด หรือผู้บาดเจ็บได้, ท่านสามารถจัดสรรน้ำและอาหารให้ผู้ที่ต้องการได้	ไม่มี แต่ท่านสามารถทำได้หากมีได้รับการศึกษาที่ตรงจุด กรุณาระบุข้อเสนอแนะที่ต้องการในอื่นๆ	ท่านขาดอุปกรณ์และเครื่องมือเพื่อเพิ่มความสามารถในการช่วยเหลือ กรุณาระบุอุปกรณ์และเครื่องมือที่ต้องการในอื่นๆ	ท่านขาดทรัพยากรในองค์กรเพื่อเพิ่มความสามารถในการช่วยเหลือ กรุณาระบุทรัพยากรในองค์กรที่ต้องการในอื่นๆ	ไม่มี แต่ท่านสามารถทำได้หากมีคนมาแนะนำการฝึกปฏิบัติ กรุณาระบุสิ่งที่ท่านสามารถฝึกได้ในอื่นๆ	ขาดทักษะและประสบการณ์
12/16/2020 14:27:43	อนุบาล 1	มัธยม 3		1232	เสนานิคม	ท่านสามารถรับดูแลผู้บาดเจ็บเล็กน้อยได้, ท่านสามารถรับดูแลผู้ป่วยที่มีอาการตกใจและให้การดูแลทางด้านจิตใจได้, ท่านสามารถจัดสรรน้ำและอาหารให้ผู้ที่ต้องการได้	ใช่ แต่ท่านต้องการการศึกษาเพิ่มเติม กรุณาระบุข้อเสนอแนะที่ต้องการศึกษาเพิ่มเติมในอื่นๆ	ท่านขาดอุปกรณ์และเครื่องมือเพื่อเพิ่มความสามารถในการช่วยเหลือ กรุณาระบุอุปกรณ์และเครื่องมือที่ต้องการในอื่นๆ	ท่านขาดทรัพยากรในองค์กรเพื่อเพิ่มความสามารถในการช่วยเหลือ กรุณาระบุทรัพยากรในองค์กรที่ต้องการในอื่นๆ	ใช่ แต่ท่านต้องการการฝึกปฏิบัติเพิ่มเติม กรุณาระบุสิ่งที่ท่านสามารถฝึกได้ในอื่นๆ	อุปกรณ์บางอย่างไม่เพียงพอต่อการช่วยเหลือ และบุคลากร มีความรู้แค่เบื้องต้นเท่านั้น
12/23/2020 9:09:27	อนุบาล 1	ประถม 6		713	อยู่เป็นสุขอนุสรณ์	ท่านสามารถทำการห้ามเลือด ซ่อมบาดแผล การช่วยชีวิตและหัตถการฉุกเฉินอื่นๆได้, ท่านสามารถรับดูแลผู้บาดเจ็บเล็กน้อยได้, ท่านสามารถรับดูแลผู้ป่วยที่มีอาการตกใจและให้การดูแลทางด้านจิตใจได้, ท่านสามารถจัดสรรที่พักสำหรับคนจรจัด หรือผู้บาดเจ็บได้, ท่านสามารถจัดสรรน้ำและอาหารให้ผู้ที่ต้องการได้, ท่านสามารถช่วยดูแลเด็กได้ กรณีญาติผู้ใหญ่จำเป็นต้องให้การช่วยเหลือผู้อื่น, ท่านสามารถส่งเจ้าหน้าที่ไปช่วยเหลือองค…	ใช่ แต่ท่านต้องการการศึกษาเพิ่มเติม กรุณาระบุข้อเสนอแนะที่ต้องการศึกษาเพิ่มเติมในอื่นๆ	ท่านขาดอุปกรณ์และเครื่องมือเพื่อเพิ่มความสามารถในการช่วยเหลือ กรุณาระบุอุปกรณ์และเครื่องมือที่ต้องการในอื่นๆ	ท่านขาดทรัพยากรในองค์กรเพื่อเพิ่มความสามารถในการช่วยเหลือ กรุณาระบุทรัพยากรในองค์กรที่ต้องการในอื่นๆ	ใช่ แต่ท่านต้องการการฝึกปฏิบัติเพิ่มเติม กรุณาระบุสิ่งที่ท่านสามารถฝึกได้ในอื่นๆ	ควรมีการอบรมเชิงปฏิบัติการสม่ำเสมอ
12/14/2020 15:12:14	อนุบาล 1	มัธยม 3		1867	วัดนิมมานรดี	ท่านสามารถรับดูแลผู้บาดเจ็บเล็กน้อยได้	ไม่มี แต่ท่านสามารถทำได้หากมีได้รับการศึกษาที่ตรงจุด กรุณาระบุข้อเสนอแนะที่ต้องการในอื่นๆ	ท่านขาดอุปกรณ์และเครื่องมือเพื่อเพิ่มความสามารถในการช่วยเหลือ กรุณาระบุอุปกรณ์และเครื่องมือที่ต้องการในอื่นๆ	ท่านขาดทรัพยากรในองค์กรเพื่อเพิ่มความสามารถในการช่วยเหลือ กรุณาระบุทรัพยากรในองค์กรที่ต้องการในอื่นๆ	ไม่มี แต่ท่านสามารถทำได้หากมีคนมาแนะนำการฝึกปฏิบัติ กรุณาระบุสิ่งที่ท่านสามารถฝึกได้ในอื่นๆ	เป็นงานวิจัยที่เป็นประโยชน์ต่อองค์กรและชุมชน
12/15/2020 11:14:11	อนุบาล 1	มัธยม 3		1602	วัดไทร (ถาวรพรหมานุกูล)	ท่านสามารถรับดูแลผู้บาดเจ็บเล็กน้อยได้, ท่านสามารถช่วยดูแลเด็กได้ กรณีญาติผู้ใหญ่จำเป็นต้องให้การช่วยเหลือผู้อื่น	ไม่มี แต่ท่านสามารถทำได้หากมีได้รับการศึกษาที่ตรงจุด กรุณาระบุข้อเสนอแนะที่ต้องการในอื่นๆ	ท่านขาดอุปกรณ์และเครื่องมือเพื่อเพิ่มความสามารถในการช่วยเหลือ กรุณาระบุอุปกรณ์และเครื่องมือที่ต้องการในอื่นๆ	ท่านขาดทรัพยากรในองค์กรเพื่อเพิ่มความสามารถในการช่วยเหลือ กรุณาระบุทรัพยากรในองค์กรที่ต้องการในอื่นๆ	ไม่มี แต่ท่านสามารถทำได้หากมีคนมาแนะนำการฝึกปฏิบัติ กรุณาระบุสิ่งที่ท่านสามารถฝึกได้ในอื่นๆ	ไม่มี
12/14/2020 13:18:31	อนุบาล 1	มัธยม 3	6 ไร่	581	ทุ่งสองห้อง(คุปตัษเฐียรอุทิศ)	ท่านสามารถทำการห้ามเลือด ซ่อมบาดแผล การช่วยชีวิตและหัตถการฉุกเฉินอื่นๆได้, ท่านสามารถรับดูแลผู้บาดเจ็บเล็กน้อยได้, ท่านสามารถรับดูแลผู้ป่วยที่มีอาการตกใจและให้การดูแลทางด้านจิตใจได้, ท่านสามารถจัดสรรน้ำและอาหารให้ผู้ที่ต้องการได้, ท่านสามารถช่วยดูแลเด็กได้ กรณีญาติผู้ใหญ่จำเป็นต้องให้การช่วยเหลือผู้อื่น, ท่านสามารถส่งเจ้าหน้าที่ไปช่วยเหลือองค์กรอื่นได้	ไม่มี แต่ท่านสามารถทำได้หากมีได้รับการศึกษาที่ตรงจุด กรุณาระบุข้อเสนอแนะที่ต้องการในอื่นๆ	ท่านมีอุปกรณ์และเครื่องมือเพียงพอต่อการช่วยเหลือสถานการณ์พิเศษ	ท่านมีสิ่งอำนวยความสะดวกเพียงพอต่อการช่วยเหลือสถานการณ์พิเศษ, ท่านขาดทรัพยากรในองค์กรเพื่อเพิ่มความสามารถในการช่วยเหลือ กรุณาระบุทรัพยากรในองค์กรที่ต้องการในอื่นๆ	ใช่ อย่างแน่นอน	ให้ความดูแลเป็นพิเศษในกรณีที่​เกิดในโรงเรียน ถ้านอกสถานที่ไม่สะดวกในทุกกรณีค่ะ
12/15/2020 9:38:47	อนุบาล 1	ประถม 6		730	โรงเรียนพหลโยธิน( พ่วงเจริญอุปถัมภ์)	ท่านสามารถรับดูแลผู้บาดเจ็บเล็กน้อยได้, ท่านสามารถรับดูแลผู้ป่วยที่มีอาการตกใจและให้การดูแลทางด้านจิตใจได้, ท่านสามารถจัดสรรน้ำและอาหารให้ผู้ที่ต้องการได้, ท่านสามารถช่วยดูแลเด็กได้ กรณีญาติผู้ใหญ่จำเป็นต้องให้การช่วยเหลือผู้อื่น	ไม่มี แต่ท่านสามารถทำได้หากมีได้รับการศึกษาที่ตรงจุด กรุณาระบุข้อเสนอแนะที่ต้องการในอื่นๆ	ช่วยเหลือได้กรณีบาดเจ็บเล็กน้อย	อุปกรณ์เครื่องมือปฐมพนาบาลเบื้องต้น	ไม่มี แต่ท่านสามารถทำได้หากมีคนมาแนะนำการฝึกปฏิบัติ กรุณาระบุสิ่งที่ท่านสามารถฝึกได้ในอื่นๆ	ต้องการการฝึกอบรมให้ความรู้เบื้องต้นในการปฐมพยาบาลแก่ครูและบุคลากร
12/16/2020 18:21:22	อนุบาล 1	ประถม 6	84 ตารางวา	525	โรงเรียนวัดท่าพระ	ท่านสามารถทำการห้ามเลือด ซ่อมบาดแผล การช่วยชีวิตและหัตถการฉุกเฉินอื่นๆได้, ท่านสามารถรับดูแลผู้บาดเจ็บเล็กน้อยได้, ท่านสามารถรับดูแลผู้ป่วยที่มีอาการตกใจและให้การดูแลทางด้านจิตใจได้, ท่านสามารถจัดสรรน้ำและอาหารให้ผู้ที่ต้องการได้, ท่านสามารถช่วยดูแลเด็กได้ กรณีญาติผู้ใหญ่จำเป็นต้องให้การช่วยเหลือผู้อื่น	ใช่ แต่ท่านต้องการการศึกษาเพิ่มเติม กรุณาระบุข้อเสนอแนะที่ต้องการศึกษาเพิ่มเติมในอื่นๆ	ท่านขาดอุปกรณ์และเครื่องมือเพื่อเพิ่มความสามารถในการช่วยเหลือ กรุณาระบุอุปกรณ์และเครื่องมือที่ต้องการในอื่นๆ, กล่องอุปกรณ์ปฐมพยาบาลเบื้องต้น	ท่านขาดทรัพยากรในองค์กรเพื่อเพิ่มความสามารถในการช่วยเหลือ กรุณาระบุทรัพยากรในองค์กรที่ต้องการในอื่นๆ, ผู้เชี่ยวชาญเฉพาะด้าน	ใช่ แต่ท่านต้องการการฝึกปฏิบัติเพิ่มเติม กรุณาระบุสิ่งที่ท่านสามารถฝึกได้ในอื่นๆ, การปฐมพยาบาลเบื้องต้น	อุปกรณ์และผู้ให้ความรู้

## Sheet: Sport
Sports Arena
Timestamp	ชื่อสถานที่ของท่าน	1.ท่านสามารถให้การช่วยเหลือเร่งด่วนสำหรับผู้บาดเจ็บข้อใดบ้าง	2.ท่านมีทักษะเพียงพอสำหรับการช่วยเหลือที่ท่านอยากให้ในอุบัติเหตุใหญ่หรือไม่	3.1. ในด้านอุปกรณ์และเครื่องมือ	3.2.ในด้านทรัพยากรในองค์กร	3.3.ในด้านทรัพยากรด้านความรู้ความสามารถ ท่านมีทักษะที่จำเป็นสำหรับสิ่งที่ท่านจะทำในเหตุการณ์ที่ต้องการการดูแลปริมาณมาก	กรุณาให้ความเห็นเพิ่มเติม
12/15/2020 15:15:27	ศูนย์กีฬาเฉลิมพระเกียรติ 84 พรรษา	ท่านสามารถทำการห้ามเลือด ซ่อมบาดแผล การช่วยชีวิตและหัตถการฉุกเฉินอื่นๆได้, ท่านสามารถรับดูแลผู้บาดเจ็บเล็กน้อยได้	ใช่ แต่ท่านต้องการการศึกษาเพิ่มเติม กรุณาระบุข้อเสนอแนะที่ต้องการศึกษาเพิ่มเติมในอื่นๆ	ท่านขาดอุปกรณ์และเครื่องมือเพื่อเพิ่มความสามารถในการช่วยเหลือ กรุณาระบุอุปกรณ์และเครื่องมือที่ต้องการในอื่นๆ	ท่านขาดทรัพยากรในองค์กรเพื่อเพิ่มความสามารถในการช่วยเหลือ กรุณาระบุทรัพยากรในองค์กรที่ต้องการในอื่นๆ	ใช่ แต่ท่านต้องการการฝึกปฏิบัติเพิ่มเติม กรุณาระบุสิ่งที่ท่านสามารถฝึกได้ในอื่นๆ	หน่วยงานควรมีการจัดอบรมหรือส่งเจ้าหน้าที่เข้าอบรมและจัดหาอุปกรณ์ให้เหมาะสมกับสถานการณ์ที่อาจเกิดขึ้น..
12/15/2020 15:15:27	ศูนย์กีฬาเฉลิมพระเกียรติ 84 พรรษา	ท่านสามารถทำการห้ามเลือด ซ่อมบาดแผล การช่วยชีวิตและหัตถการฉุกเฉินอื่นๆได้, ท่านสามารถรับดูแลผู้บาดเจ็บเล็กน้อยได้	ใช่ แต่ท่านต้องการการศึกษาเพิ่มเติม กรุณาระบุข้อเสนอแนะที่ต้องการศึกษาเพิ่มเติมในอื่นๆ	ท่านขาดอุปกรณ์และเครื่องมือเพื่อเพิ่มความสามารถในการช่วยเหลือ กรุณาระบุอุปกรณ์และเครื่องมือที่ต้องการในอื่นๆ	ท่านขาดทรัพยากรในองค์กรเพื่อเพิ่มความสามารถในการช่วยเหลือ กรุณาระบุทรัพยากรในองค์กรที่ต้องการในอื่นๆ	ใช่ แต่ท่านต้องการการฝึกปฏิบัติเพิ่มเติม กรุณาระบุสิ่งที่ท่านสามารถฝึกได้ในอื่นๆ	หน่วยงานควรมีการจัดอบรมหรือส่งเจ้าหน้าที่เข้าอบรมและจัดหาอุปกรณ์ให้เหมาะสมกับสถานการณ์ที่อาจเกิดขึ้น..
12/14/2020 9:48:27	ศูนย์กีฬาบึงหนองบอน	ท่านสามารถรับดูแลผู้บาดเจ็บเล็กน้อยได้, ท่านสามารถรับดูแลผู้ป่วยที่มีอาการตกใจและให้การดูแลทางด้านจิตใจได้, ท่านสามารถจัดสรรที่พักสำหรับคนจรจัด หรือผู้บาดเจ็บได้, ท่านสามารถช่วยดูแลเด็กได้ กรณีญาติผู้ใหญ่จำเป็นต้องให้การช่วยเหลือผู้อื่น	ไม่มี แต่ท่านสามารถทำได้หากมีได้รับการศึกษาที่ตรงจุด กรุณาระบุข้อเสนอแนะที่ต้องการในอื่นๆ, มีการฝึกอบรมในการปฐมพยาบาลและช่วยเหลือผู้บาดเจ็บ	ท่านขาดอุปกรณ์และเครื่องมือเพื่อเพิ่มความสามารถในการช่วยเหลือ กรุณาระบุอุปกรณ์และเครื่องมือที่ต้องการในอื่นๆ, ชุดปฐมพยาบาล เนื่องจากมีไม่เพียงพอและเครื่องกระตุกหัวใจอัตโนมัติ	ท่านมีสิ่งอำนวยความสะดวกเพียงพอต่อการช่วยเหลือสถานการณ์พิเศษ	ไม่มี แต่ท่านสามารถทำได้หากมีคนมาแนะนำการฝึกปฏิบัติ กรุณาระบุสิ่งที่ท่านสามารถฝึกได้ในอื่นๆ, คู่มือการปฐมพยาบาลและการดูแลผู้บาดเจ็บ รวมถึงมีการฝึกอบรมในการปฐมพยาบาลผู้ป่วยด้านต่างๆ	-
12/16/2020 10:00:20	ศูนย์กีฬาอ่อนนุช	ท่านสามารถรับดูแลผู้บาดเจ็บเล็กน้อยได้	ใช่ แต่ท่านต้องการการศึกษาเพิ่มเติม กรุณาระบุข้อเสนอแนะที่ต้องการศึกษาเพิ่มเติมในอื่นๆ	ท่านขาดอุปกรณ์และเครื่องมือเพื่อเพิ่มความสามารถในการช่วยเหลือ กรุณาระบุอุปกรณ์และเครื่องมือที่ต้องการในอื่นๆ	ท่านขาดทรัพยากรในองค์กรเพื่อเพิ่มความสามารถในการช่วยเหลือ กรุณาระบุทรัพยากรในองค์กรที่ต้องการในอื่นๆ	ใช่ แต่ท่านต้องการการฝึกปฏิบัติเพิ่มเติม กรุณาระบุสิ่งที่ท่านสามารถฝึกได้ในอื่นๆ	ไม่มีความเห็นเพิ่มเติม
12/22/2020 17:20:40	ศูนย์วิทยาศาสตร์การกีฬาคลินิกเวชกรรม	ท่านสามารถรับดูแลผู้บาดเจ็บเล็กน้อยได้	ใช่ อย่างแน่นอน	มีเพียงรถพยาบาลพื้นฐาน 1 คัน	ท่านขาดทรัพยากรในองค์กรเพื่อเพิ่มความสามารถในการช่วยเหลือ กรุณาระบุทรัพยากรในองค์กรที่ต้องการในอื่นๆ, มีเพียงพยาบาลวิชาชีพ 2 ตำแหน่งไม่มีแพทย์	ไม่มี แต่ท่านสามารถทำได้หากมีคนมาแนะนำการฝึกปฏิบัติ กรุณาระบุสิ่งที่ท่านสามารถฝึกได้ในอื่นๆ, ขั้นตอนต่างๆในการปฏิบัติเมื่อเกิดอุบัติภัยหมู่การติดต่อสื่อสารการประสานงานและการส่งต่อ	การกีฬาแห่งประเทศไทยมีเพียงสถานที่ที่สามารถเอื้ออำนวยให้ได้แต่ไม่มีบุคลากรทางการแพทย์ที่เพียงพอ

## Sheet: Veterinary
Veterinary clinics
Timestamp	ชื่อคลินิกของท่าน	1.หากเวลาที่เกิดเหตุหน่วยงานของท่านมีผู้ขึ้นปฏิบัติงานปกติ ท่านจะให้ความช่วยเหลืออะไรบ้าง	2.1. ในด้านอุปกรณ์และเครื่องมือ	2.2.ในด้านทรัพยากรในองค์กร	2.3.ในด้านทรัพยากรด้านความรู้ความสามารถ คลินิกของท่านมีทักษะเพียงพอสำหรับการช่วยเหลือที่ท่านอยากให้ในอุบัติเหตุใหญ่เมื่อความต้องการการช่วยเหลือมากกว่าทรัพยากรที่มีหรือไม่	กรุณาให้ความเห็นเพิ่มเติม
11/23/2020 9:59:17	โรงพยาบาลสัตว์วุฒิชัย	ท่านสามารถรับดูแลผู้บาดเจ็บเล็กน้อยได้	ท่านขาดอุปกรณ์และเครื่องมือเพื่อเพิ่มความสามารถในการช่วยเหลือ กรุณาระบุอุปกรณ์และเครื่องมือที่ต้องการในอื่นๆ	ท่านขาดทรัพยากรในองค์กรเพื่อเพิ่มความสามารถในการช่วยเหลือ กรุณาระบุทรัพยากรในองค์กรที่ต้องการในอื่นๆ	ไม่มี แต่ท่านสามารถทำได้หากมีคนมาแนะนำการฝึกปฏิบัติ กรุณาระบุสิ่งที่ท่านสามารถฝึกได้ในอื่นๆ	ไม่มีครับ
11/23/2020 15:27:22	โรงพยาบาลสัตวแพทย์ 50	ท่านสามารถรับดูแลผู้บาดเจ็บเล็กน้อยได้	ท่านขาดอุปกรณ์และเครื่องมือเพื่อเพิ่มความสามารถในการช่วยเหลือ กรุณาระบุอุปกรณ์และเครื่องมือที่ต้องการในอื่นๆ	ท่านขาดทรัพยากรในองค์กรเพื่อเพิ่มความสามารถในการช่วยเหลือ กรุณาระบุทรัพยากรในองค์กรที่ต้องการในอื่นๆ	ไม่มี แต่ท่านสามารถทำได้หากมีคนมาแนะนำการฝึกปฏิบัติ กรุณาระบุสิ่งที่ท่านสามารถฝึกได้ในอื่นๆ	No comment
11/23/2020 19:14:52	อุรุพงษ์รักษาสัตว์	ท่านสามารถรับดูแลผู้บาดเจ็บเล็กน้อยได้	ท่านขาดอุปกรณ์และเครื่องมือเพื่อเพิ่มความสามารถในการช่วยเหลือ กรุณาระบุอุปกรณ์และเครื่องมือที่ต้องการในอื่นๆ	ท่านขาดทรัพยากรในองค์กรเพื่อเพิ่มความสามารถในการช่วยเหลือ กรุณาระบุทรัพยากรในองค์กรที่ต้องการในอื่นๆ	ไม่มี แต่ท่านสามารถทำได้หากมีคนมาแนะนำการฝึกปฏิบัติ กรุณาระบุสิ่งที่ท่านสามารถฝึกได้ในอื่นๆ	-
11/23/2020 21:05:04	คลินิคแสนสุขสามเสน28	ท่านสามารถรับดูแลผู้บาดเจ็บเล็กน้อยได้	ท่านขาดอุปกรณ์และเครื่องมือเพื่อเพิ่มความสามารถในการช่วยเหลือ กรุณาระบุอุปกรณ์และเครื่องมือที่ต้องการในอื่นๆ, อุปกรที่ใช้ในคน	ัคน	ใช่ แต่ท่านต้องการการฝึกปฏิบัติเพิ่มเติม, ไม่มี แต่ท่านสามารถทำได้หากมีคนมาแนะนำการฝึกปฏิบัติ กรุณาระบุสิ่งที่ท่านสามารถฝึกได้ในอื่นๆ	ยินดีให้ความช่วยเหลือเบื้องต้นเช่นการดมออกซิเจนแผลเบื้องต้นแต่กรณีกู้ชีพไม่สามารถทำได้ค่ะ
11/25/2020 17:05:13	คลินิกสัตว์เลี้ยง เอ็น.ที.	ท่านสามารถรับดูแลผู้บาดเจ็บรุนแรงด้วยการให้การดูแลเบื้องต้นให้ผู้บาดเจ็บมีอาการคงที่ ระหว่างรอการส่งต่อไปยังโรงพยาบาลขนาดใหญ่	ท่านมีอุปกรณ์และเครื่องมือเพียงพอต่อการช่วยเหลือสถานการณ์พิเศษ	ท่านขาดทรัพยากรในองค์กรเพื่อเพิ่มความสามารถในการช่วยเหลือ กรุณาระบุทรัพยากรในองค์กรที่ต้องการในอื่นๆ	ใช่ แต่ท่านต้องการการฝึกปฏิบัติเพิ่มเติม	ไม่มี
12/1/2020 23:23:19	คลิรักสัตว์	ท่านสามารถรับดูแลผู้บาดเจ็บเล็กน้อยได้, องค์กรของท่านมีทรัพยากรที่สามารถช่วยเหลือได้ ได้แก่ พื้นที่ อุปกรณ์และเครื่องมือทางการแพทย์	ท่านขาดอุปกรณ์และเครื่องมือเพื่อเพิ่มความสามารถในการช่วยเหลือ กรุณาระบุอุปกรณ์และเครื่องมือที่ต้องการในอื่นๆ, ถังออกซิเจน	ท่านมีทรัพยากรในองค์กรเพียงพอต่อการช่วยเหลือสถานการณ์พิเศษ	ใช่ อย่างแน่นอน, ใช่ แต่ท่านต้องการการฝึกปฏิบัติเพิ่มเติม, CPR ใส่เฝื่อกอ่อน การให้ fluid IV drip	ของที่มีในคลินิก เช่น ผ้ากอซ น้ำเกลือล้างแผล มีไม่มากพอสำหรับ 40 คน อาจช่วยได้ 5-10 คนเท่านั้น
12/2/2020 12:10:09	คลินิกสัตวแพทย์ 761	ท่านสามารถรับดูแลผู้บาดเจ็บเล็กน้อยได้, องค์กรของท่านมีทรัพยากรที่สามารถช่วยเหลือได้ ได้แก่ พื้นที่ อุปกรณ์และเครื่องมือทางการแพทย์, หน่วยงานของท่านสามารถทำผ่าตัดเล็ก เย็บแผล หรือใส่เฝือกกรณีกระดูกหักที่ไม่ซับซ้อน	ท่านมีอุปกรณ์และเครื่องมือเพียงพอต่อการช่วยเหลือสถานการณ์พิเศษ	เครื่องมือที่ใช้ในสัตว์ บางอย่าง ไม่สะอาดเพียงพอที่จะใช้ในคน	ไม่มี แต่ท่านสามารถทำได้หากมีคนมาแนะนำการฝึกปฏิบัติ กรุณาระบุสิ่งที่ท่านสามารถฝึกได้ในอื่นๆ, ทำ cpr	อยากให้มีการจัดสัมมนาการช่วยชีวิตเบื้องต้นค่ะ จะได้ส่งบุคคลากรเข้าอบรม การช่วยชรวิตสัตว์ และคนบางทีก็ไม่มีเหมือน
12/3/2020 14:17:48	คลินิกหมอกมลรักษาสัตว์	ท่านสามารถรับดูแลผู้บาดเจ็บเล็กน้อยได้	ท่านขาดอุปกรณ์และเครื่องมือเพื่อเพิ่มความสามารถในการช่วยเหลือ กรุณาระบุอุปกรณ์และเครื่องมือที่ต้องการในอื่นๆ	ท่านขาดทรัพยากรในองค์กรเพื่อเพิ่มความสามารถในการช่วยเหลือ กรุณาระบุทรัพยากรในองค์กรที่ต้องการในอื่นๆ	ใช่ แต่ท่านต้องการการฝึกปฏิบัติเพิ่มเติม	สามารถช่วยเหลือเบื้องต้นได้บ้าง แต่อุปกรณ์และความพร้อมของบุคลากรยังไม่เพียงพอ
12/7/2020 10:28:45	สุโขทัย สัตวแพทย์	หน่วยงานของท่านสามารถให้การดูแลทางจิตใจกับผู้บาดเจ็บและทีมงานได้, ขนาดเล็กมาก มีพื้นที่น้อย	ท่านขาดอุปกรณ์และเครื่องมือเพื่อเพิ่มความสามารถในการช่วยเหลือ กรุณาระบุอุปกรณ์และเครื่องมือที่ต้องการในอื่นๆ, อุปกรณ์ ไม่ฆ่าเชื้อพอ	ท่านขาดทรัพยากรในองค์กรเพื่อเพิ่มความสามารถในการช่วยเหลือ กรุณาระบุทรัพยากรในองค์กรที่ต้องการในอื่นๆ, จ้างสัตวแพทย์จากข้างนอก ฝึกผู้ช่วยแพทย์	ไม่มี แต่ท่านสามารถทำได้หากมีคนมาแนะนำการฝึกปฏิบัติ กรุณาระบุสิ่งที่ท่านสามารถฝึกได้ในอื่นๆ	ทางคลินิคไม่พร้อมรับผู้บาดเจ็บ
12/7/2020 11:59:21	ร้านสัตวแพทย์หมอหนุ่ยวัดไผ่ตัน	ท่านสามารถรับดูแลผู้บาดเจ็บเล็กน้อยได้	ท่านมีอุปกรณ์และเครื่องมือเพียงพอต่อการช่วยเหลือสถานการณ์พิเศษ	ท่านมีทรัพยากรในองค์กรเพียงพอต่อการช่วยเหลือสถานการณ์พิเศษ	ไม่มี แต่ท่านสามารถทำได้หากมีคนมาแนะนำการฝึกปฏิบัติ กรุณาระบุสิ่งที่ท่านสามารถฝึกได้ในอื่นๆ	ช่วยเหลือเรื่องทำแผล แต่งแผล
12/7/2020 16:17:49	ร้านสัตวแพทย์หมอหนุ่ยวัดไผ่ตัน	ท่านสามารถรับดูแลผู้บาดเจ็บเล็กน้อยได้	ท่านมีอุปกรณ์และเครื่องมือเพียงพอต่อการช่วยเหลือสถานการณ์พิเศษ	ท่านมีทรัพยากรในองค์กรเพียงพอต่อการช่วยเหลือสถานการณ์พิเศษ	ไม่มี แต่ท่านสามารถทำได้หากมีคนมาแนะนำการฝึกปฏิบัติ กรุณาระบุสิ่งที่ท่านสามารถฝึกได้ในอื่นๆ	ช่วยเหลือเรื่องทำแผล แต่งแผล
12/7/2020 21:09:58	คลินิกสัตวแพทย์	ท่านสามารถรับดูแลผู้บาดเจ็บเล็กน้อยได้	ท่านขาดอุปกรณ์และเครื่องมือเพื่อเพิ่มความสามารถในการช่วยเหลือ กรุณาระบุอุปกรณ์และเครื่องมือที่ต้องการในอื่นๆ	ท่านขาดทรัพยากรในองค์กรเพื่อเพิ่มความสามารถในการช่วยเหลือ กรุณาระบุทรัพยากรในองค์กรที่ต้องการในอื่นๆ	ใช่ แต่ท่านต้องการการฝึกปฏิบัติเพิ่มเติม	ควรมีการฝึกปฏิบัติการเพื่อให้ปฏิบัติได้เมื่อมีเหตุฉุกเฉินต้องให้ความช่วยเหลือได้ทันที
12/7/2020 23:20:46	ร้านสัตวแพทย์หมอหนุ่ยวัดไผ่ตัน	ท่านสามารถรับดูแลผู้บาดเจ็บเล็กน้อยได้	ท่านมีอุปกรณ์และเครื่องมือเพียงพอต่อการช่วยเหลือสถานการณ์พิเศษ	ท่านมีทรัพยากรในองค์กรเพียงพอต่อการช่วยเหลือสถานการณ์พิเศษ	ไม่มี แต่ท่านสามารถทำได้หากมีคนมาแนะนำการฝึกปฏิบัติ กรุณาระบุสิ่งที่ท่านสามารถฝึกได้ในอื่นๆ	ช่วยเหลือเรื่องทำแผล แต่งแผล
12/11/2020 12:06:42	โรงพยาบาลสัตว์เบสท์แคร์	ท่านสามารถรับดูแลผู้บาดเจ็บเล็กน้อยได้	ท่านขาดอุปกรณ์และเครื่องมือเพื่อเพิ่มความสามารถในการช่วยเหลือ กรุณาระบุอุปกรณ์และเครื่องมือที่ต้องการในอื่นๆ	ท่านมีทรัพยากรในองค์กรเพียงพอต่อการช่วยเหลือสถานการณ์พิเศษ	ใช่ แต่ท่านต้องการการฝึกปฏิบัติเพิ่มเติม	เปิดคอร์สสอนการช่วยเหลือเบื้องต้นเพิ่มเติม

## Sheet: Hotel
Hotel
Timestamp	ชื่อสถานที่ของท่าน	1.ท่านสามารถให้การช่วยเหลือเร่งด่วนสำหรับผู้บาดเจ็บข้อใดบ้าง	2.ท่านมีทักษะเพียงพอสำหรับการช่วยเหลือที่ท่านอยากให้ในอุบัติเหตุใหญ่หรือไม่	3.1. ในด้านอุปกรณ์และเครื่องมือ	3.2.ในด้านทรัพยากรในองค์กร	3.3.ในด้านทรัพยากรด้านความรู้ความสามารถ ท่านมีทักษะที่จำเป็นสำหรับสิ่งที่ท่านจะทำในเหตุการณ์ที่ต้องการการดูแลปริมาณมาก	กรุณาให้ความเห็นเพิ่มเติม
12/15/2020 14:49:22	ariyoutopia	ท่านสามารถจัดสรรที่พักสำหรับคนจรจัด หรือผู้บาดเจ็บได้, ท่านสามารถจัดสรรน้ำและอาหารให้ผู้ที่ต้องการได้	ใช่ อย่างแน่นอน	ท่านมีอุปกรณ์และเครื่องมือเพียงพอต่อการช่วยเหลือสถานการณ์พิเศษ, dressing, bandaging 1-2 sets	ท่านขาดทรัพยากรในองค์กรเพื่อเพิ่มความสามารถในการช่วยเหลือ กรุณาระบุทรัพยากรในองค์กรที่ต้องการในอื่นๆ, องค์กรขนาดเล็ก อุปกรณ์ไม่พอ	ใช่ แต่ท่านต้องการการฝึกปฏิบัติเพิ่มเติม กรุณาระบุสิ่งที่ท่านสามารถฝึกได้ในอื่นๆ, ที่จอดฉุกเฉินทุกชุมชน สำหรับรถพยาบาลฉุกเฉิน และต้องการฝึกทักษะ BLS and first aids ให้บุคลากรของโรงแรม	อยากให้มีกฎหมายที่เกี่ยวข้องกับการปรับปรุง
12/13/2020 14:36:56	Let's Zzz Bangkok	ท่านสามารถจัดสรรที่พักสำหรับคนจรจัด หรือผู้บาดเจ็บได้, ท่านสามารถจัดสรรน้ำและอาหารให้ผู้ที่ต้องการได้, ท่านสามารถช่วยดูแลเด็กได้ กรณีญาติผู้ใหญ่จำเป็นต้องให้การช่วยเหลือผู้อื่น	ไม่มี แต่ท่านสามารถทำได้หากมีได้รับการศึกษาที่ตรงจุด กรุณาระบุข้อเสนอแนะที่ต้องการในอื่นๆ	ท่านขาดอุปกรณ์และเครื่องมือเพื่อเพิ่มความสามารถในการช่วยเหลือ กรุณาระบุอุปกรณ์และเครื่องมือที่ต้องการในอื่นๆ	ท่านขาดทรัพยากรในองค์กรเพื่อเพิ่มความสามารถในการช่วยเหลือ กรุณาระบุทรัพยากรในองค์กรที่ต้องการในอื่นๆ	ไม่มี แต่ท่านสามารถทำได้หากมีคนมาแนะนำการฝึกปฏิบัติ กรุณาระบุสิ่งที่ท่านสามารถฝึกได้ในอื่นๆ	No comment
12/15/2020 10:22:06	Loogchoob the city homestay	ท่านสามารถจัดสรรที่พักสำหรับคนจรจัด หรือผู้บาดเจ็บได้, ท่านสามารถจัดสรรน้ำและอาหารให้ผู้ที่ต้องการได้	ใช่ อย่างแน่นอน	ท่านมีอุปกรณ์และเครื่องมือเพียงพอต่อการช่วยเหลือสถานการณ์พิเศษ	ท่านขาดทรัพยากรในองค์กรเพื่อเพิ่มความสามารถในการช่วยเหลือ กรุณาระบุทรัพยากรในองค์กรที่ต้องการในอื่นๆ, กำลังคน	ไม่มี แต่ท่านสามารถทำได้หากมีคนมาแนะนำการฝึกปฏิบัติ กรุณาระบุสิ่งที่ท่านสามารถฝึกได้ในอื่นๆ	เป็นโรงแรมขนาดเล็ก​ จึงไม่มีกำลังคนที่จะดูแลคนจำนวนมาก​ แต่พอมีพื้นที่ให้คนที่ช่วยเหลือตัวเองได้​เข้าพักพิงชั่วคราวได้
12/23/2020 17:09:12	Vic3 Bangkok	ท่านสามารถรับดูแลผู้บาดเจ็บเล็กน้อยได้, ท่านสามารถรับดูแลผู้ป่วยที่มีอาการตกใจและให้การดูแลทางด้านจิตใจได้, ท่านสามารถจัดสรรที่พักสำหรับคนจรจัด หรือผู้บาดเจ็บได้, ท่านสามารถจัดสรรน้ำและอาหารให้ผู้ที่ต้องการได้, ท่านสามารถช่วยดูแลเด็กได้ กรณีญาติผู้ใหญ่จำเป็นต้องให้การช่วยเหลือผู้อื่น	ใช่ แต่ท่านต้องการการศึกษาเพิ่มเติม กรุณาระบุข้อเสนอแนะที่ต้องการศึกษาเพิ่มเติมในอื่นๆ	ท่านขาดอุปกรณ์และเครื่องมือเพื่อเพิ่มความสามารถในการช่วยเหลือ กรุณาระบุอุปกรณ์และเครื่องมือที่ต้องการในอื่นๆ	ท่านขาดทรัพยากรในองค์กรเพื่อเพิ่มความสามารถในการช่วยเหลือ กรุณาระบุทรัพยากรในองค์กรที่ต้องการในอื่นๆ	ไม่มี แต่ท่านสามารถทำได้หากมีคนมาแนะนำการฝึกปฏิบัติ กรุณาระบุสิ่งที่ท่านสามารถฝึกได้ในอื่นๆ	ไม่มี
12/12/2020 15:46:32	villaphrasumen	ท่านสามารถรับดูแลผู้บาดเจ็บเล็กน้อยได้, ท่านสามารถจัดสรรน้ำและอาหารให้ผู้ที่ต้องการได้, ท่านสามารถช่วยดูแลเด็กได้ กรณีญาติผู้ใหญ่จำเป็นต้องให้การช่วยเหลือผู้อื่น	ไม่มี แต่ท่านสามารถทำได้หากมีได้รับการศึกษาที่ตรงจุด กรุณาระบุข้อเสนอแนะที่ต้องการในอื่นๆ	ท่านขาดอุปกรณ์และเครื่องมือเพื่อเพิ่มความสามารถในการช่วยเหลือ กรุณาระบุอุปกรณ์และเครื่องมือที่ต้องการในอื่นๆ	ท่านขาดทรัพยากรในองค์กรเพื่อเพิ่มความสามารถในการช่วยเหลือ กรุณาระบุทรัพยากรในองค์กรที่ต้องการในอื่นๆ	ไม่มี แต่ท่านสามารถทำได้หากมีคนมาแนะนำการฝึกปฏิบัติ กรุณาระบุสิ่งที่ท่านสามารถฝึกได้ในอื่นๆ	ไม่มี
12/18/2020 14:13:37	โรงแรมไนซ์พาเลซ	ท่านสามารถจัดสรรที่พักสำหรับคนจรจัด หรือผู้บาดเจ็บได้, ท่านสามารถจัดสรรน้ำและอาหารให้ผู้ที่ต้องการได้, ท่านสามารถช่วยดูแลเด็กได้ กรณีญาติผู้ใหญ่จำเป็นต้องให้การช่วยเหลือผู้อื่น	ใช่ แต่ท่านต้องการการศึกษาเพิ่มเติม กรุณาระบุข้อเสนอแนะที่ต้องการศึกษาเพิ่มเติมในอื่นๆ	ท่านขาดอุปกรณ์และเครื่องมือเพื่อเพิ่มความสามารถในการช่วยเหลือ กรุณาระบุอุปกรณ์และเครื่องมือที่ต้องการในอื่นๆ	ท่านขาดทรัพยากรในองค์กรเพื่อเพิ่มความสามารถในการช่วยเหลือ กรุณาระบุทรัพยากรในองค์กรที่ต้องการในอื่นๆ	ไม่มี แต่ท่านสามารถทำได้หากมีคนมาแนะนำการฝึกปฏิบัติ กรุณาระบุสิ่งที่ท่านสามารถฝึกได้ในอื่นๆ	-
12/14/2020 12:39:34	โรงแรมสยามสวานา	ท่านสามารถทำการห้ามเลือด ซ่อมบาดแผล การช่วยชีวิตและหัตถการฉุกเฉินอื่นๆได้, ท่านสามารถรับดูแลผู้บาดเจ็บเล็กน้อยได้, ท่านสามารถจัดสรรน้ำและอาหารให้ผู้ที่ต้องการได้	ใช่ อย่างแน่นอน	ท่านขาดอุปกรณ์และเครื่องมือเพื่อเพิ่มความสามารถในการช่วยเหลือ กรุณาระบุอุปกรณ์และเครื่องมือที่ต้องการในอื่นๆ	ท่านขาดทรัพยากรในองค์กรเพื่อเพิ่มความสามารถในการช่วยเหลือ กรุณาระบุทรัพยากรในองค์กรที่ต้องการในอื่นๆ	ใช่ อย่างแน่นอน	อยากให้ภาครัฐเข้ามาดูแลองค์กร
12/16/2020 9:16:18	โรงแรมสวนดุสิตเพลส	ท่านสามารถรับดูแลผู้ป่วยที่มีอาการตกใจและให้การดูแลทางด้านจิตใจได้, ท่านสามารถจัดสรรน้ำและอาหารให้ผู้ที่ต้องการได้, ท่านสามารถช่วยดูแลเด็กได้ กรณีญาติผู้ใหญ่จำเป็นต้องให้การช่วยเหลือผู้อื่น	ใช่ อย่างแน่นอน	ท่านมีอุปกรณ์และเครื่องมือเพียงพอต่อการช่วยเหลือสถานการณ์พิเศษ	ท่านมีสิ่งอำนวยความสะดวกเพียงพอต่อการช่วยเหลือสถานการณ์พิเศษ	ใช่ อย่างแน่นอน	โรงแรมมีการจัดอบรมพื้นฐานให้พนักงานที่เกี่ยวข้องอยู่ประจำปีแต่จะช่วยได้ในกรณีที่เลือกข้างต้นเพราะบุคลากรที่ได้อบรมมีจำนวนน้อยถ้ามีเหตุการณ์ที่ต้องช่วยเหลือคงต้องประสานผู้เชี่ยวชาญมาฝึกอบรมอีกครั้ง
